# Supplementary material for: Design, synthesis, and fungicidal activity of novel carboxylic acid amides represented by N-benzhydryl valinamode carbamates
Source: Royal Society of Chemistry journal article supplement (doi:10.1039/c4ob00744a), 2014-01-01

*Supporting information for:*

**Design, Synthesis and Antifungal Activities of a Novel Carboxylic  
Acid Amides Fungicide: Substituted N-Benzhydryl Valinamide  
Carbamates**

Xiu-Jiang Du,<sup>a</sup> Qiang Bian,<sup>\*b</sup> Hong-Xue Wang,<sup>b</sup> Shu-Jing Yu,<sup>a</sup> Jun-Jie Kou,<sup>b</sup> Zhi-Peng Wang,<sup>a</sup>  
Zheng-Ming Li,<sup>a</sup> Wei-Guang Zhao<sup>\*a</sup>

*State Key Laboratory of Elemento-Organic Chemistry, National Pesticide Engineering Research  
Center (Tianjin), Nankai University, Tianjin 300071, China*

**Table of contents**

|                                                                           |         |
|---------------------------------------------------------------------------|---------|
| Data for new compounds.....                                               | S3-S12  |
| Copies of <sup>1</sup> H, <sup>13</sup> C NMR and HRMS of compounds ..... | S13-S81 |

**(3,4-dimethoxy phenyl)(phenyl)methanone 4a.** white solid, mp 85 - 87 °C. [ref: 88 - 90 °C].<sup>1</sup>

**(3,4-dimethoxy phenyl)(4-fluorophenyl)methanone 4b.** white solid, mp 115 - 117 °C. [ref: 117.5 - 119.5 °C].<sup>2</sup>

**(3,4-dimethoxy phenyl)(4-chlorophenyl)methanone 4c.** white solid, mp 105 - 107 °C. [ref: 111 - 112 °C].<sup>3</sup>

**(3,4-dimethoxy phenyl)(4-bromophenyl)methanone 4d.** white solid, mp 115 - 117 °C. [ref: 121 - 122 °C].<sup>4</sup>

**(3,4-dimethoxy phenyl)(4-methylphenyl)methanone 4e.** white solid, mp 108 - 110 °C. [ref: 105 - 107 °C].<sup>5</sup>

**(3,4-dimethoxy phenyl)(4-tert-Butylphenyl)methanone 4f** was commercial reagents (J&K).

**(3,4-dimethoxy phenyl)(4-methoxy phenyl)methanone 4g.** white solid, mp 98 - 100 °C. [ref: 98.3 - 99.2 °C].<sup>6</sup>

**(3-methoxy-4-ethoxy phenyl)(phenyl)methanol 3h.** white solid, mp 108 - 110 °C. <sup>1</sup>H NMR (400 MHz, CDCl<sub>3</sub>) δ 7.34 - 7.15 (m, 5H, Ph-H), 6.85 (d, *J* = 1.8 Hz, 1H, Ph-H), 6.76 (dt, *J* = 15.2, 5.0 Hz, 2H, Ph-H), 5.71 (s, 1H, Ph-CH-Ph), 4.00 (q, *J* = 7.0 Hz, 2H, CH<sub>3</sub>CH<sub>2</sub>O), 3.76 (s, 3H, CH<sub>3</sub>O), 1.37 (t, *J* = 7.0 Hz, 3H, CH<sub>3</sub>CH<sub>2</sub>O).

**(3-methoxy-4-ethoxy phenyl)(4-fluorophenyl)methanol 3i.** white solid, mp 95 - 96 °C. <sup>1</sup>H NMR (300 MHz, CDCl<sub>3</sub>) δ 7.34 (dd, *J* = 8.4, 5.6 Hz, 2H, Ph-H), 7.02 (t, *J* = 8.7 Hz, 2H, Ph-H), 6.89 (s, 1H, Ph-H), 6.83 (s, 2H, Ph-H), 5.78 (s, 1H, Ph-H-Ph), 4.08 (q, *J* = 7.0 Hz, 2H, OCH<sub>2</sub>CH<sub>3</sub>), 3.84 (s, 3H, OCH<sub>3</sub>), 1.45 (t, *J* = 7.0 Hz, 3H, OCH<sub>2</sub>CH<sub>3</sub>). HRMS calcd for C<sub>16</sub>H<sub>17</sub>FO<sub>3</sub> ([M + H]): 276.1054; Found: 276.1162.

**(3-methoxy-4-ethoxy phenyl)(4-chlorophenyl)methanol 3j.** white solid, mp 88 - 90 °C. <sup>1</sup>H NMR (400 MHz, CDCl<sub>3</sub>) δ 7.29 (s, 4H, Ph-H), 6.85 (s, 1H, Ph-H), 6.80 (d, *J* = 0.4 Hz, 2H, Ph-H), 5.72 (s, 1H, Ph-H-Ph), 4.07 (dd, *J* = 14.0, 7.0 Hz, 2H, OCH<sub>2</sub>CH<sub>3</sub>), 3.81 (s, 3H, OCH<sub>3</sub>), 1.44 (t, *J* = 7.0 Hz, 3H, OCH<sub>2</sub>CH<sub>3</sub>). HRMS calcd for C<sub>16</sub>H<sub>17</sub>ClO<sub>3</sub> ([M + H]): 292.1582; Found: 292.0866.

**(3-methoxy-4-ethoxy phenyl)(4-methylphenyl)methanol 3k.** white solid, mp 92 - 94 °C. <sup>1</sup>H NMR (300 MHz, CDCl<sub>3</sub>) δ 7.35 - 7.24 (m, 2H, Ph-H), 7.17 (d, *J* = 7.9 Hz, 2H, Ph-H), 6.95 (s, 1H, Ph-H), 6.90 - 6.80 (m, 2H, Ph-H), 5.79 (s, 1H, Ph-H-Ph), 4.10 (q, *J* = 7.0 Hz, 2H, OCH<sub>2</sub>CH<sub>3</sub>), 3.86 (s, 3H, OCH<sub>3</sub>), 2.36 (s, 3H, Ph-CH<sub>3</sub>), 1.47 (t, *J* = 7.0 Hz, 3H, OCH<sub>2</sub>CH<sub>3</sub>). HRMS calcd for C<sub>17</sub>H<sub>20</sub>O<sub>3</sub> ([M + H]): 272.1304; Found: 272.1412.

**(3-methoxy-4-propargyl phenyl)(4-methylphenyl)methanol 3l.** yellow oil. <sup>1</sup>H NMR (400 MHz, CDCl<sub>3</sub>) δ 7.40 - 7.23 (m, 2H, Ph-H), 7.17 (t, *J* = 7.5 Hz, 2H, Ph-H), 7.07 - 6.83 (m, 3H, Ph-H), 5.58 (d, *J* = 177.9 Hz, 1H, Ph-H-Ph), 4.77 (d, *J* = 2.1 Hz, 2H, CHCH<sub>2</sub>O), 3.97 - 3.73 (m, 3H, OCH<sub>3</sub>), 2.53 (d, *J* = 2.4 Hz, 1H, CHCH<sub>2</sub>O), 2.37 (s, 3H, Ph-CH<sub>3</sub>).

**(3-methoxy-4-benzyloxy phenyl)(4-fluorophenyl)methanol 3m.**<sup>7</sup> white solid, mp 92 - 94 °C.

**(3-methoxy-4-benzyloxy phenyl)(4-chlorophenyl)methanol 3n.** white solid, mp 81 - 83 °C. [ref: 82 - 85 °C].<sup>8</sup>

**(3-methoxy-4-benzyloxy phenyl)(4-bromophenyl)methanol 3o.** white solid, mp 91 - 93 °C. <sup>1</sup>H NMR (400 MHz, CDCl<sub>3</sub>) δ 7.42 (d, *J* = 7.1 Hz, 2H, Ph-H), 7.36 (t, *J* = 7.3 Hz, 2H, Ph-H), 7.30 (s, 5H, Ph-H), 6.90 (d, *J* = 1.6 Hz, 1H, Ph-H), 6.83 (d, *J* = 8.2 Hz, 1H, Ph-H), 6.77 (dd, *J* = 8.3, 1.6 Hz, 1H, Ph-H), 5.75 (d, *J* = 3.1 Hz, 1H, Ph-H-Ph), 5.14 (s, 2H, Ph-CH<sub>2</sub>O), 3.85 (s, 3H, OCH<sub>3</sub>).

**(3-methoxy-4-benzyloxy phenyl)(4-methylphenyl)methanol 3p.** white solid, mp 100 - 102 °C. [ref: 101 - 103 °C].<sup>9</sup>

**(3-ethoxy-4-methoxy phenyl)(phenyl)methanol 3q.** white solid, mp 101 - 104 °C. <sup>1</sup>H NMR (400

MHz, CDCl<sub>3</sub>) δ 7.41 – 7.22 (m, 5H, Ph-H), 6.96 – 6.76 (m, 3H, Ph-H), 5.78 (s, 1H, Ph-H-Ph), 4.06 (q, *J* = 7.0 Hz, 2H, OCH<sub>2</sub>CH<sub>3</sub>), 3.85 (s, 3H, OCH<sub>3</sub>), 1.43 (t, *J* = 7.0 Hz, 3H, OCH<sub>2</sub>CH<sub>3</sub>).

**(3-ethoxyl-4-methoxyl phenyl)(4-fluorophenyl)methanol 3r.** white solid, mp 96 - 98 °C. <sup>1</sup>H NMR (300 MHz, CDCl<sub>3</sub>) δ 7.34 (dd, *J* = 8.4, 5.6 Hz, 2H, Ph-H), 7.02 (t, *J* = 8.7 Hz, 2H, Ph-H), 6.89 (s, 1H, Ph-H), 6.83 (s, 2H, Ph-H), 5.78 (s, 1H, Ph-H-Ph), 4.08 (q, *J* = 7.0 Hz, 2H, OCH<sub>2</sub>CH<sub>3</sub>), 3.84 (s, 3H, OCH<sub>3</sub>), 1.45 (t, *J* = 7.0 Hz, 3H, OCH<sub>2</sub>CH<sub>3</sub>).

**(3-ethoxyl-4-methoxyl phenyl)(4-chlorophenyl)methanol 3s.** white solid, mp 97 - 99 °C. <sup>1</sup>H NMR (300 MHz, CDCl<sub>3</sub>) δ 7.35 – 7.13 (m, 4H, Ph-H), 6.78 (d, *J* = 7.8 Hz, 3H, Ph-H), 5.23 (s, 1H, Ph-H-Ph), 3.95 (q, *J* = 6.9 Hz, 2H, OCH<sub>2</sub>CH<sub>3</sub>), 3.82 (d, *J* = 3.9 Hz, 3H, OCH<sub>3</sub>), 1.42 – 1.30 (m, 3H, OCH<sub>2</sub>CH<sub>3</sub>). HRMS calcd for C<sub>16</sub>H<sub>17</sub>ClO<sub>3</sub> ([M + Na]): 292.0758; Found: 292.0866.

**(3-ethoxyl-4-methoxyl phenyl)(4-bromophenyl)methanol 3t.** white solid, mp 102 - 104 °C. <sup>1</sup>H NMR (400 MHz, CDCl<sub>3</sub>) δ 7.43 (dd, *J* = 10.4, 8.5 Hz, 2H, Ph-H), 7.22 (dd, *J* = 17.8, 10.0 Hz, 2H, Ph-H), 6.82 (d, *J* = 10.8 Hz, 3H, Ph-H), 5.26 (s, 1H, Ph-H-Ph), 4.11 – 3.91 (m, 2H, OCH<sub>2</sub>CH<sub>3</sub>), 3.86 (d, *J* = 5.1 Hz, 3H, OCH<sub>3</sub>), 1.41 (t, *J* = 6.9 Hz, 3H, OCH<sub>2</sub>CH<sub>3</sub>).

**(3-ethoxyl-4-methoxyl phenyl)(4-methylphenyl)methanol 3u.** white solid, mp 82 - 84 °C. <sup>1</sup>H NMR (300 MHz, CDCl<sub>3</sub>) δ 7.35 – 7.24 (m, 2H, Ph-H), 7.17 (d, *J* = 7.9 Hz, 2H, Ph-H), 6.95 (s, 1H, Ph-H), 6.90 – 6.80 (m, 2H, Ph-H), 5.79 (s, 1H, Ph-H-Ph), 4.10 (q, *J* = 7.0 Hz, 2H, OCH<sub>2</sub>CH<sub>3</sub>), 3.86 (s, 3H, OCH<sub>3</sub>), 2.36 (s, 3H, Ph-CH<sub>3</sub>), 1.47 (t, *J* = 7.0 Hz, 3H, OCH<sub>2</sub>CH<sub>3</sub>). HRMS calcd for C<sub>16</sub>H<sub>20</sub>O<sub>3</sub> ([M + H]): 272.1331; Found: 272.1412.

**(3-benzyloxy-4-methoxyl phenyl)(4-methylphenyl)methanol 3v.** white solid, mp 112 - 114 °C. <sup>1</sup>H NMR (300 MHz, CDCl<sub>3</sub>) δ 7.42 – 7.20 (m, 5H, Ph-H), 7.17 (d, *J* = 6.1 Hz, 2H, Ph-H), 7.07 (d, *J* = 8.0 Hz, 2H, Ph-H), 6.88 (s, 1H, Ph-H), 6.79 – 6.67 (m, 2H, Ph-H), 5.68 (s, 1H, Ph-H-Ph), 5.06 (s, 2H, Ph-CH<sub>2</sub>), 3.78 (s, 3H, OCH<sub>3</sub>), 2.26 (s, 3H, Ph-CH<sub>3</sub>). HRMS calcd for C<sub>22</sub>H<sub>22</sub>O<sub>3</sub> ([M + Na]): 334.1587; Found: 334.1569.

**(3-methoxyl-4-ethoxyl phenyl)(phenyl)methanone 4h.** white solid, mp 100 - 102 °C. <sup>1</sup>H NMR (400 MHz, CDCl<sub>3</sub>) δ 7.76 (dd, *J* = 8.2, 1.3 Hz, 2H, Ph-H), 7.63 – 7.53 (m, 1H, Ph-H), 7.48 (dd, *J* = 13.5, 4.7 Hz, 3H, Ph-H), 7.36 (dd, *J* = 8.3, 2.0 Hz, 1H, Ph-H), 6.88 (d, *J* = 8.4 Hz, 1H, Ph-H), 4.19 (q, *J* = 7.0 Hz, 2H, CH<sub>3</sub>CH<sub>2</sub>O), 3.94 (s, 3H, CH<sub>3</sub>O), 1.52 (t, *J* = 7.0 Hz, 3H, CH<sub>3</sub>CH<sub>2</sub>O).

**(3-methoxyl-4-ethoxyl phenyl)(4-fluorophenyl)methanone 4i.** white solid, mp 92 - 94 °C. <sup>1</sup>H NMR (400 MHz, CDCl<sub>3</sub>) δ 7.80 (dd, *J* = 8.4, 5.6 Hz, 2H, Ph-H), 7.46 (d, *J* = 1.5 Hz, 1H, Ph-H), 7.32 (dd, *J* = 8.3, 1.6 Hz, 1H, Ph-H), 7.15 (t, *J* = 8.5 Hz, 2H, Ph-H), 6.88 (d, *J* = 8.4 Hz, 1H, Ph-H), 4.19 (q, *J* = 7.0 Hz, 2H, OCH<sub>2</sub>CH<sub>3</sub>), 3.93 (s, 3H, OCH<sub>3</sub>), 1.52 (t, *J* = 7.0 Hz, 3H, OCH<sub>2</sub>CH<sub>3</sub>). HRMS calcd for C<sub>16</sub>H<sub>15</sub>FO<sub>3</sub> ([M + H]): 274.1084; Found: 274.1005.

**(3-methoxyl-4-ethoxyl phenyl)(4-chlorophenyl)methanone 4j.** white solid, mp 117 - 119 °C. <sup>1</sup>H NMR (400 MHz, CDCl<sub>3</sub>) δ 7.71 (d, *J* = 8.4 Hz, 2H, Ph-H), 7.48 – 7.43 (m, 3H, Ph-H), 7.32 (dd, *J* = 8.3, 2.0 Hz, 1H, Ph-H), 6.88 (d, *J* = 8.4 Hz, 1H, Ph-H), 4.19 (q, *J* = 7.0 Hz, 2H, OCH<sub>2</sub>CH<sub>3</sub>), 3.94 (s, 3H, OCH<sub>3</sub>), 1.52 (t, *J* = 7.0 Hz, 3H, OCH<sub>2</sub>CH<sub>3</sub>). HRMS calcd for C<sub>16</sub>H<sub>15</sub>ClO<sub>3</sub> ([M + H]): 290.0784; Found: 290.0710.

**(3-methoxyl-4-ethoxyl phenyl)(4-methylphenyl)methanone 4k.** white solid, mp 78 - 80 °C. <sup>1</sup>H NMR (400 MHz, CDCl<sub>3</sub>) δ 7.68 (d, *J* = 8.1 Hz, 2H, Ph-H), 7.47 (d, *J* = 1.9 Hz, 1H, Ph-H), 7.35 (dd, *J* = 8.3, 2.0 Hz, 1H, Ph-H), 7.28 (d, *J* = 8.1 Hz, 2H, Ph-H), 6.88 (d, *J* = 8.4 Hz, 1H, Ph-H), 4.19 (q, *J* = 7.0 Hz, 2H, OCH<sub>2</sub>CH<sub>3</sub>), 3.93 (s, 3H, OCH<sub>3</sub>), 2.44 (s, 3H, Ph-CH<sub>3</sub>), 1.52 (t, *J* = 7.0 Hz, 3H, OCH<sub>2</sub>CH<sub>3</sub>). HRMS calcd for C<sub>17</sub>H<sub>18</sub>O<sub>3</sub> ([M + H]): 270.1334; Found: 270.1256.

**(3-methoxyl-4-benzyloxy phenyl)(4-fluorophenyl)methanone 4m.** white solid, mp 98 - 100 °C.

[ref: 99 - 101 °C].<sup>7</sup>

**(3-methoxy-4-benzyloxy phenyl)(4-chlorophenyl)methanone 4n.** white solid, mp 103 - 104 °C.  
[ref: 106 - 108 °C].<sup>7</sup>

**(3-methoxy-4-benzyloxy phenyl)(4-methylphenyl)methanone 4p.** white solid, mp 72 - 74 °C.  
[ref: 70 - 72 °C].<sup>9</sup>

**(3-ethoxy-4-methoxy phenyl)(phenyl)methanone 4q.** white solid, mp 118 - 120 °C. <sup>1</sup>H NMR (400 MHz, CDCl<sub>3</sub>) δ 7.80 – 7.70 (m, 2H, Ph-H), 7.57 (t, *J* = 7.4 Hz, 1H, Ph-H), 7.48 (dt, *J* = 10.3, 5.0 Hz, 3H, Ph-H), 7.37 (dd, *J* = 8.3, 2.0 Hz, 1H, Ph-H), 6.89 (d, *J* = 8.4 Hz, 1H, Ph-H), 4.17 (q, *J* = 7.0 Hz, 2H, OCH<sub>2</sub>CH<sub>3</sub>), 3.95 (s, 3H, OCH<sub>3</sub>), 1.49 (t, *J* = 7.0 Hz, 3H, OCH<sub>2</sub>CH<sub>3</sub>). HRMS calcd for C<sub>16</sub>H<sub>16</sub>O<sub>3</sub> ([M + H]): 256.1177; Found: 256.1099.

**(3-ethoxy-4-methoxy phenyl)(4-fluorophenyl)methanone 4r.** white solid, mp 123 - 125 °C. <sup>1</sup>H NMR (400 MHz, CDCl<sub>3</sub>) δ 7.80 (dd, *J* = 8.7, 5.5 Hz, 2H, Ph-H), 7.44 (d, *J* = 1.8 Hz, 1H, Ph-H), 7.34 (dd, *J* = 8.3, 1.9 Hz, 1H, Ph-H), 7.15 (t, *J* = 8.6 Hz, 2H, Ph-H), 6.90 (d, *J* = 8.4 Hz, 1H, Ph-H), 4.16 (q, *J* = 7.0 Hz, 2H, OCH<sub>2</sub>CH<sub>3</sub>), 3.96 (s, 3H, OCH<sub>3</sub>), 1.50 (t, *J* = 7.0 Hz, 3H, OCH<sub>2</sub>CH<sub>3</sub>). HRMS calcd for C<sub>16</sub>H<sub>15</sub>FO<sub>3</sub> ([M + H]): 274.1083; Found: 274.1005.

**(3-ethoxy-4-methoxy phenyl)(4-chlorophenyl)methanone 4s.** white solid, mp 110 - 111 °C. <sup>1</sup>H NMR (400 MHz, CDCl<sub>3</sub>) δ 7.75 – 7.64 (m, 2H, Ph-H), 7.51 – 7.41 (m, 3H, Ph-H), 7.32 (dd, *J* = 8.3, 2.0 Hz, 1H, Ph-H), 6.88 (d, *J* = 8.4 Hz, 1H, Ph-H), 4.19 (q, *J* = 7.0 Hz, 2H, OCH<sub>2</sub>CH<sub>3</sub>), 3.93 (s, 3H, OCH<sub>3</sub>), 1.52 (t, *J* = 7.0 Hz, 3H, OCH<sub>2</sub>CH<sub>3</sub>). HRMS calcd for C<sub>16</sub>H<sub>15</sub>ClO<sub>3</sub> ([M + H]): 290.0787; Found: 290.0710.

**(3-ethoxy-4-methoxy phenyl)(4-bromophenyl)methanone 4t.** white solid, mp 123 - 124 °C. <sup>1</sup>H NMR (400 MHz, CDCl<sub>3</sub>) δ 7.63 (d, *J* = 1.7 Hz, 4H, Ph-H), 7.44 (d, *J* = 2.0 Hz, 1H, Ph-H), 7.33 (dd, *J* = 8.3, 2.0 Hz, 1H, Ph-H), 6.89 (d, *J* = 8.4 Hz, 1H, Ph-H), 4.16 (q, *J* = 7.0 Hz, 2H, OCH<sub>2</sub>CH<sub>3</sub>), 3.96 (s, 3H, OCH<sub>3</sub>), 1.50 (t, *J* = 7.0 Hz, 3H, OCH<sub>2</sub>CH<sub>3</sub>). HRMS calcd for C<sub>16</sub>H<sub>15</sub>BrO<sub>3</sub> ([M + H]): 334.0277; Found: 334.0205.

**(3-ethoxy-4-methoxy phenyl)(4-methylphenyl)methanone 4u.** white solid, mp 113 - 115 °C. <sup>1</sup>H NMR (400 MHz, CDCl<sub>3</sub>) δ 7.68 (d, *J* = 7.5 Hz, 2H, Ph-H), 7.40 – 7.34 (m, 2H, Ph-H), 7.28 (m, 1H, Ph-H), 7.15 (d, *J* = 7.1 Hz, 1H, Ph-H), 6.89 (d, *J* = 8.3 Hz, 1H, Ph-H), 4.24 – 4.10 (m, 2H, OCH<sub>2</sub>CH<sub>3</sub>), 3.95 (s, 3H, OCH<sub>3</sub>), 2.44 (s, 3H, Ph-CH<sub>3</sub>), 1.49 (t, *J* = 6.6 Hz, 3H, OCH<sub>2</sub>CH<sub>3</sub>). HRMS calcd for C<sub>17</sub>H<sub>18</sub>O<sub>3</sub> ([M + H]): 270.1334; Found: 270.1256.

**(3-benzyloxy-4-methoxy phenyl)(4-methylphenyl)methanone 4v.** white solid, mp 114 - 115 °C. <sup>1</sup>H NMR (400 MHz, CDCl<sub>3</sub>) δ 7.51 (d, *J* = 8.1 Hz, 2H, Ph-H), 7.39 – 7.21 (m, 7H, Ph-H), 7.14 (d, *J* = 7.9 Hz, 2H, Ph-H), 6.83 (d, *J* = 8.4 Hz, 1H, Ph-H), 5.09 (s, 2H, Ph-CH<sub>2</sub>O), 3.87 (s, 3H, OCH<sub>3</sub>), 2.34 (s, 3H, Ph-CH<sub>3</sub>). HRMS calcd for C<sub>22</sub>H<sub>20</sub>O<sub>3</sub> ([M + H]): 332.1489; Found: 332.1412.  
Compounds **5a-5g** were prepared according to published procedures.<sup>10, 11</sup>

**(3-methoxy-4-ethoxy phenyl)(phenyl)methanone oxime 5h.** yellow oil. <sup>1</sup>H NMR (400 MHz, CDCl<sub>3</sub>) δ 7.55 – 7.29 (m, 5H, Ph-H), 7.22 – 6.89 (m, 2H, Ph-H), 6.78 (dd, *J* = 14.1, 5.1 Hz, 1H, Ph-H), 4.14 (dd, *J* = 15.2, 8.5 Hz, 2H, CH<sub>3</sub>CH<sub>2</sub>O), 3.84 (s, 3H, CH<sub>3</sub>O), 1.51 – 1.45 (m, 3H, CH<sub>3</sub>CH<sub>2</sub>O).

**(3-methoxy-4-ethoxy phenyl)(4-fluorophenyl)methanone oxime 5i.** yellow oil. <sup>1</sup>H NMR (400 MHz, CDCl<sub>3</sub>) δ 7.44 (ddd, *J* = 19.4, 8.7, 5.5 Hz, 2H, Ph-H), 7.20 – 7.09 (m, 2H, Ph-H), 6.99 (ddd, *J* = 20.8, 11.1, 5.9 Hz, 2H, Ph-H), 6.78 (s, 1H, Ph-H), 4.13 (dd, *J* = 20.6, 7.0 Hz, 2H, OCH<sub>2</sub>CH<sub>3</sub>), 3.84 (d, *J* = 2.6 Hz, 3H, OCH<sub>3</sub>), 1.48 (dd, *J* = 18.5, 7.0 Hz, 3H, OCH<sub>2</sub>CH<sub>3</sub>). HRMS calcd for C<sub>16</sub>H<sub>16</sub>FNO<sub>3</sub> ([M + K]): 289.1114; Found: 289.1667.

**(3-methoxy-4-ethoxy phenyl)(4-chlorophenyl)methanone oxime 5j.** white solid, mp 107 - 109 °C. <sup>1</sup>H NMR (400 MHz, CDCl<sub>3</sub>) δ 7.43 (t, *J* = 6.6 Hz, 2H, Ph-H), 7.33 (dd, *J* = 13.2, 8.1 Hz, 2H, Ph-H), 7.21 (s, 1H, Ph-H), 6.96 (d, *J* = 19.0 Hz, 1H, Ph-H), 6.78 (s, 1H, Ph-H), 4.13 (dd, *J* = 19.8, 6.8 Hz, 2H, OCH<sub>2</sub>CH<sub>3</sub>), 3.85 (d, *J* = 9.5 Hz, 3H, OCH<sub>3</sub>), 1.75 – 1.22 (m, 3H, OCH<sub>2</sub>CH<sub>3</sub>). HRMS calcd for C<sub>22</sub>H<sub>20</sub>O<sub>3</sub> ([M + K]): 289.1114; Found: 289.1667. HRMS calcd for C<sub>16</sub>H<sub>16</sub>ClNO<sub>3</sub> ([M + H]): 305.0785; Found: 305.0819.

**(3-methoxy-4-ethoxy phenyl)(4-methylphenyl)methanone oxime 5k.** white solid, mp 87 - 89 °C. <sup>1</sup>H NMR (400 MHz, CDCl<sub>3</sub>) δ 7.29 (ddd, *J* = 25.4, 22.1, 4.9 Hz, 4H, Ph-H), 7.14 (d, *J* = 8.0 Hz, 1H, Ph-H), 6.96 (dd, *J* = 12.0, 10.3 Hz, 1H, Ph-H), 6.80 (dt, *J* = 21.7, 5.2 Hz, 1H, Ph-H), 4.13 (dd, *J* = 22.3, 7.0 Hz, 2H, OCH<sub>2</sub>CH<sub>3</sub>), 3.84 (d, *J* = 5.6 Hz, 3H, OCH<sub>3</sub>), 2.41 (s, 1H), 1.51 – 1.45 (m, 3H, OCH<sub>2</sub>CH<sub>3</sub>). HRMS calcd for C<sub>17</sub>H<sub>19</sub>NO<sub>3</sub> ([M + H]): 285.1442; Found: 285.1365.

**(3-methoxy-4-benzyloxy phenyl)(4-methylphenyl)methanone oxime 5p.** white solid, mp 92 - 94 °C. <sup>1</sup>H NMR (400 MHz, CDCl<sub>3</sub>) δ 7.45 – 7.25 (m, 5H, Ph-H), 7.14 (d, *J* = 5.2 Hz, 1H, Ph-H), 7.04 (d, *J* = 3.6 Hz, 1H, Ph-H), 7.01 – 6.94 (m, 1H, Ph-H), 5.13 (s, 2H, Ph-CH<sub>2</sub>O), 3.93 (dd, *J* = 17.8, 3.4 Hz, 3H, OCH<sub>3</sub>), 2.42 (dd, *J* = 23.3, 3.2 Hz, 3H, Ph-CH<sub>3</sub>).

**(3-ethoxy-4-methoxy phenyl)(phenyl)methanone oxime 5q.** white solid, mp 128 - 130 °C. <sup>1</sup>H NMR (400 MHz, CDCl<sub>3</sub>) δ 7.51 – 7.29 (m, 5H, Ph-H), 7.21 (s, 1H, Ph-H), 7.04 – 6.91 (m, 1H, Ph-H), 6.81 (dt, *J* = 21.9, 5.1 Hz, 1H, Ph-H), 4.07 (dd, *J* = 7.0, 3.6 Hz, 2H, OCH<sub>2</sub>CH<sub>3</sub>), 3.90 (d, *J* = 20.0 Hz, 3H, OCH<sub>3</sub>), 1.44 (td, *J* = 6.9, 1.4 Hz, 3H, OCH<sub>2</sub>CH<sub>3</sub>). HRMS calcd for C<sub>16</sub>H<sub>17</sub>NO<sub>3</sub> ([M + H]): 271.1177; Found: 271.1208.

**(3-ethoxy-4-methoxy phenyl)(4-fluorophenyl)methanone 5r.** white solid, mp 86 - 88 °C. <sup>1</sup>H NMR (400 MHz, CDCl<sub>3</sub>) δ 7.87 – 7.70 (m, 2H, Ph-H), 7.48 – 7.41 (m, 2H, Ph-H), 7.34 (dd, *J* = 8.3, 2.0 Hz, 1H, Ph-H), 7.16 (s, 1H, Ph-H), 6.89 (s, 1H, Ph-H), 4.17 (q, *J* = 7.0 Hz, 2H, OCH<sub>2</sub>CH<sub>3</sub>), 3.96 (s, 3H, OCH<sub>3</sub>), 1.43 (t, *J* = 7.0 Hz, 3H, OCH<sub>2</sub>CH<sub>3</sub>). HRMS calcd for C<sub>16</sub>H<sub>16</sub>FNO<sub>3</sub> ([M + H]): 289.1177; Found: 289.1114.

**(3-ethoxy-4-methoxy phenyl)(4-chlorophenyl)methanone oxime 5s.** yellow oil. <sup>1</sup>H NMR (400 MHz, CDCl<sub>3</sub>) δ 7.87 – 7.70 (m, 2H, Ph-H), 7.48 – 7.41 (m, 2H, Ph-H), 7.34 (dd, *J* = 8.3, 2.0 Hz, 1H, Ph-H), 7.16 (s, 1H, Ph-H), 6.89 (s, 1H, Ph-H), 4.17 (q, *J* = 7.0 Hz, 2H, OCH<sub>2</sub>CH<sub>3</sub>), 3.96 (s, 3H, OCH<sub>3</sub>), 1.43 (t, *J* = 7.0 Hz, 3H, OCH<sub>2</sub>CH<sub>3</sub>). HRMS calcd for C<sub>16</sub>H<sub>16</sub>ClNO<sub>3</sub> ([M + H]): 305.0789; Found: 305.0819.

**(3-ethoxy-4-methoxy phenyl)(4-bromophenyl)methanone oxime 5t.** white solid, mp 85 - 87 °C. <sup>1</sup>H NMR (400 MHz, CDCl<sub>3</sub>) δ 7.53 (dd, *J* = 50.5, 8.4 Hz, 2H, Ph-H), 7.32 (dd, *J* = 26.5, 8.2 Hz, 2H, Ph-H), 7.17 (s, 1H, Ph-H), 7.00 – 6.92 (m, 1H, Ph-H), 6.79 (d, *J* = 2.9 Hz, 1H, Ph-H), 4.12 – 4.01 (m, 2H, OCH<sub>2</sub>CH<sub>3</sub>), 3.90 (d, *J* = 17.3 Hz, 3H, OCH<sub>3</sub>), 1.45 (t, *J* = 7.0 Hz, 3H, OCH<sub>2</sub>CH<sub>3</sub>). HRMS calcd for C<sub>16</sub>H<sub>16</sub>BrNO<sub>3</sub> ([M + K]): 349.0102; Found: 349.0314.

**(3-ethoxy-4-methoxy phenyl)(4-methylphenyl)methanone oxime 5u.** yellow oil. <sup>1</sup>H NMR (400 MHz, CDCl<sub>3</sub>) δ 7.72 (d, *J* = 8.0 Hz, 1H, Ph-H), 7.49 (s, 1H, Ph-H), 7.40 (d, *J* = 8.1 Hz, 1H, Ph-H), 7.30 (d, *J* = 7.6 Hz, 2H, Ph-H), 7.04 – 6.88 (m, 2H, Ph-H), 4.19 (dt, *J* = 9.2, 4.7 Hz, 2H, OCH<sub>2</sub>CH<sub>3</sub>), 3.97 (d, *J* = 13.1 Hz, 3H, OCH<sub>3</sub>), 2.47 (s, 3H, Ph-CH<sub>3</sub>), 1.52 (t, *J* = 7.0 Hz, 3H, OCH<sub>2</sub>CH<sub>3</sub>). HRMS calcd for C<sub>17</sub>H<sub>19</sub>NO<sub>3</sub> ([M + H]): 285.1441; Found: 285.1365.

**(3-benzyloxy-4-methoxy phenyl)(4-methylphenyl)methanone oxime 5v.** white solid, mp 120 - 122 °C. <sup>1</sup>H NMR (400 MHz, CDCl<sub>3</sub>) δ 7.36 (d, *J* = 10.7 Hz, 2H, Ph-H), 7.33 (d, *J* = 7.2 Hz, 3H, Ph-H), 7.25 (d, *J* = 7.3 Hz, 4H, Ph-H), 7.12 (d, *J* = 7.1 Hz, 1H, Ph-H), 7.04 (s, 1H, Ph-H), 6.95 (d, *J* = 8.6 Hz, 1H, Ph-H), 5.10 (s, 2H, OCH<sub>2</sub>-Ph), 3.91 (d, *J* = 17.1 Hz, 3H, OCH<sub>3</sub>), 2.41 (t, *J* = 13.8

Hz, 3H, Ph-CH<sub>3</sub>). HRMS calcd for C<sub>22</sub>H<sub>21</sub>NO<sub>2</sub> ([M + H]): 347.1599; Found: 347.1521.

Compounds **6a-6g** were prepared according to published procedures.<sup>10, 11</sup>

**(3-methoxy-4-ethoxy phenyl)(phenyl)methanamine 6h.** yellow oil. <sup>1</sup>H NMR (400 MHz, CDCl<sub>3</sub>) δ 7.37 (d, *J* = 7.2 Hz, 2H, Ph-H), 7.31 (t, *J* = 7.5 Hz, 2H, Ph-H), 7.23 (d, *J* = 7.1 Hz, 1H, Ph-H), 6.93 (d, *J* = 1.8 Hz, 1H, Ph-H), 6.87 (dd, *J* = 8.2, 1.9 Hz, 1H, Ph-H), 6.80 (d, *J* = 8.2 Hz, 1H, Ph-H), 5.16 (s, 1H, Ph-CH-Ph), 4.07 (q, *J* = 7.0 Hz, 2H, CH<sub>2</sub>CH<sub>3</sub>O), 3.83 (s, 3H, CH<sub>3</sub>O), 1.52 – 1.36 (m, 3H, CH<sub>3</sub>CH<sub>2</sub>O).

**(3-methoxy-4-ethoxy phenyl)(4-fluorophenyl)methanamine 6i.** yellow oil. <sup>1</sup>H NMR (400 MHz, CDCl<sub>3</sub>) δ 7.40 – 7.28 (m, 2H, Ph-H), 6.98 (t, *J* = 8.4 Hz, 2H, Ph-H), 6.93 – 6.74 (m, 3H, Ph-H), 5.14 (s, 1H, CHNH), 4.06 (dd, *J* = 13.6, 6.7 Hz, 2H, OCH<sub>2</sub>CH<sub>3</sub>), 3.83 (s, 3H, OCH<sub>3</sub>), 1.44 (t, *J* = 6.8 Hz, 3H, OCH<sub>2</sub>CH<sub>3</sub>). HRMS calcd for C<sub>16</sub>H<sub>18</sub>FNO<sub>3</sub> ([M + H]): 275.1137; Found: 275.1322.

**(3-methoxy-4-ethoxy phenyl)(4-chlorophenyl)methanamine 6j.** white solid, mp 36 - 38 °C. <sup>1</sup>H NMR (400 MHz, CDCl<sub>3</sub>) δ 7.32 (dt, *J* = 13.5, 6.6 Hz, 4H, Ph-H), 6.93 – 6.80 (m, 3H, Ph-H), 5.19 (s, 1H, CHNH), 4.14 – 4.04 (m, 2H, OCH<sub>2</sub>CH<sub>3</sub>), 3.86 (s, 3H, OCH<sub>3</sub>), 1.47 (t, *J* = 6.8 Hz, 3H, OCH<sub>2</sub>CH<sub>3</sub>). HRMS calcd for C<sub>16</sub>H<sub>18</sub>ClNO<sub>2</sub> ([M + H]): 291.1010; Found: 291.1026.

**(3-methoxy-4-ethoxy phenyl)(4-methylphenyl)methanamine 6k.** yellow oil. <sup>1</sup>H NMR (400 MHz, CDCl<sub>3</sub>) δ 7.25 (d, *J* = 8.8 Hz, 2H, Ph-H), 7.12 (d, *J* = 7.9 Hz, 2H, Ph-H), 6.93 (d, *J* = 1.9 Hz, 1H, Ph-H), 6.86 (dd, *J* = 8.2, 1.9 Hz, 1H, Ph-H), 6.80 (d, *J* = 8.2 Hz, 1H, Ph-H), 5.13 (s, 1H, CHNH), 4.06 (q, *J* = 7.0 Hz, 2H, OCH<sub>2</sub>CH<sub>3</sub>), 3.84 (s, 3H, OCH<sub>3</sub>), 2.32 (s, 3H, Ph-CH<sub>3</sub>), 1.44 (t, *J* = 7.0 Hz, 3H, OCH<sub>2</sub>CH<sub>3</sub>). HRMS calcd for C<sub>17</sub>H<sub>21</sub>NO<sub>2</sub> ([M + H]): 271.1385; Found: 271.1572.

**(3-methoxy-4-benzyloxy phenyl)(4-methylphenyl)methanamine 6p.** yellow solid. Mp 69 - 72 °C. <sup>1</sup>H NMR (400 MHz, CDCl<sub>3</sub>) δ 7.48 – 7.27 (m, 5H, Ph-H), 7.17 (d, *J* = 7.9 Hz, 2H, Ph-H), 7.09 (d, *J* = 7.8 Hz, 2H, Ph-H), 6.96 – 6.89 (m, 2H, Ph-H), 6.82 (d, *J* = 8.2 Hz, 1H, Ph-H), 5.11 (s, 2H, Ph-CH<sub>2</sub>O), 5.08 (s, 1H, CHNH), 3.85 (s, 3H, OCH<sub>3</sub>), 2.32 (s, 3H, Ph-CH<sub>3</sub>).

**(3-ethoxy-4-methoxy phenyl)(phenyl)methanamine 6q.** yellow oil. <sup>1</sup>H NMR (400 MHz, CDCl<sub>3</sub>) δ 7.40 – 7.19 (m, 5H, Ph-H), 6.96 – 6.86 (m, 2H, Ph-H), 6.81 (d, *J* = 8.1 Hz, 1H, Ph-H), 5.16 (s, 1H, CHNH), 4.06 (dd, *J* = 13.5, 6.6 Hz, 2H, OCH<sub>2</sub>CH<sub>3</sub>), 3.84 (s, 3H, OCH<sub>3</sub>), 1.42 (t, *J* = 6.5 Hz, 3H, OCH<sub>2</sub>CH<sub>3</sub>). HRMS calcd for C<sub>16</sub>H<sub>19</sub>FNO<sub>2</sub> ([M + H]): 257.1208; Found: 257.1416.

**(3-ethoxy-4-methoxy phenyl)(4-fluorophenyl)methanamine 6r.** yellow oil, <sup>1</sup>H NMR (400 MHz, CDCl<sub>3</sub>) δ 7.33 (dd, *J* = 8.5, 5.6 Hz, 2H, Ph-H), 6.98 (t, *J* = 8.7 Hz, 2H, Ph-H), 6.89 – 6.84 (m, 2H, Ph-H), 6.81 (d, *J* = 8.1 Hz, 1H, Ph-H), 5.14 (s, 1H, CHNH), 4.05 (q, *J* = 7.0 Hz, 2H, OCH<sub>2</sub>CH<sub>3</sub>), 3.84 (s, 3H, OCH<sub>3</sub>), 1.42 (t, *J* = 7.0 Hz, 3H, OCH<sub>2</sub>CH<sub>3</sub>). HRMS calcd for C<sub>16</sub>H<sub>18</sub>FNO<sub>2</sub> ([M + H]): 275.1133; Found: 275.1322.

**(3-ethoxy-4-methoxy phenyl)(4-chlorophenyl)methanamine 6s.** yellow oil. <sup>1</sup>H NMR (400 MHz, CDCl<sub>3</sub>) δ 7.32 (d, *J* = 8.6 Hz, 2H, Ph-H), 7.29 – 7.25 (m, 2H, Ph-H), 6.88 (d, *J* = 1.8 Hz, 1H, Ph-H), 6.87 – 6.83 (m, 1H, Ph-H), 6.81 (dd, *J* = 8.0, 3.1 Hz, 1H, Ph-H), 5.14 (s, 1H, CHNH), 4.07 (q, *J* = 7.0 Hz, 2H, OCH<sub>2</sub>CH<sub>3</sub>), 3.83 (s, 3H, OCH<sub>3</sub>), 1.44 (t, *J* = 7.0 Hz, 3H, OCH<sub>2</sub>CH<sub>3</sub>). HRMS calcd for C<sub>16</sub>H<sub>18</sub>ClNO<sub>2</sub> ([M + H]): 291.0838; Found: 291.1026.

**(3-ethoxy-4-methoxy phenyl)(4-bromophenyl)methanamine 6t.** yellow oil. <sup>1</sup>H NMR (400 MHz, CDCl<sub>3</sub>) δ 7.44 (d, *J* = 7.7 Hz, 2H, Ph-H), 7.28 (d, *J* = 7.8 Hz, 2H, Ph-H), 6.91 (t, *J* = 14.9 Hz, 2H, Ph-H), 6.83 (d, *J* = 7.9 Hz, 1H, Ph-H), 5.14 (s, 1H, CHNH), 4.08 (dd, *J* = 13.2, 6.4 Hz, 2H, OCH<sub>2</sub>CH<sub>3</sub>), 3.86 (s, 3H, OCH<sub>3</sub>), 1.45 (t, *J* = 6.2 Hz, 3H, OCH<sub>2</sub>CH<sub>3</sub>). HRMS calcd for C<sub>16</sub>H<sub>18</sub>BrNO<sub>2</sub> ([M + H]): 319.0329; Found: 319.0521.

**(3-ethoxy-4-methoxy phenyl)(4-methylphenyl)methanamine 6u.** yellow oil. <sup>1</sup>H NMR (400

MHz, CDCl<sub>3</sub>) δ 7.28 – 7.21 (m, 2H, Ph-H), 7.11 (d, *J* = 7.8 Hz, 2H, Ph-H), 6.93 (s, 1H, Ph-H), 6.88 (d, *J* = 8.3 Hz, 1H, Ph-H), 6.80 (d, *J* = 8.2 Hz, 1H, Ph-H), 5.13 (s, 1H, CHNH), 4.06 (q, *J* = 7.0 Hz, 2H, OCH<sub>2</sub>CH<sub>3</sub>), 3.84 (s, 3H, OCH<sub>3</sub>), 2.32 (s, 3H, Ph-CH<sub>3</sub>), 1.42 (t, *J* = 7.0 Hz, 3H, OCH<sub>2</sub>CH<sub>3</sub>). HRMS calcd for C<sub>16</sub>H<sub>18</sub>ClNO<sub>2</sub> ([M + Na]): 271.1531; Found: 271.1572.

**(3-benzyloxy-4-methoxy phenyl)(4-methylphenyl)methanamine 6v.** yellow oil, <sup>1</sup>H NMR (400 MHz, CDCl<sub>3</sub>) δ 7.40 (d, *J* = 7.1 Hz, 2H, Ph-H), 7.36 – 7.27 (m, 3H, Ph-H), 7.18 (d, *J* = 8.0 Hz, 2H, Ph-H), 7.09 (d, *J* = 7.9 Hz, 2H, Ph-H), 6.95 (d, *J* = 1.7 Hz, 1H, Ph-H), 6.91 (dd, *J* = 8.3, 1.7 Hz, 1H, Ph-H), 6.82 (d, *J* = 8.2 Hz, 1H, Ph-H), 5.11 (s, 2H, Ph-CH<sub>2</sub>O), 5.08 (s, 1H, CHNH), 3.85 (s, 3H, OCH<sub>3</sub>), 2.32 (s, 3H, Ph-CH<sub>3</sub>). HRMS calcd for C<sub>16</sub>H<sub>18</sub>FNO<sub>3</sub> ([M + H]): 275.1137; Found: 275.1322. HRMS calcd for C<sub>22</sub>H<sub>23</sub>NO<sub>2</sub> ([M + H]): 333.1497; Found: 333.1729.

**Isopropyl((2S)-1-(((3,4-dimethoxyphenyl)(phenyl)methyl)amino)-3-methyl-1-oxobutan-2-yl)carbamate 9a.** white solid, mp 171 - 172 °C. <sup>1</sup>H NMR (400 MHz, CDCl<sub>3</sub>) δ 7.48 – 7.05 (m, 5H, Ph-H), 6.92 – 6.56 (m, 3H, Ph-H), 6.18 (d, *J* = 8.0 Hz, 1H, Ph-CHNH), 5.19 (d, *J* = 8.1 Hz, 1H, Ph-CH-Ph), 4.77 (d, *J* = 5.5 Hz, 1H, COCHNH), 4.02 (t, *J* = 7.5 Hz, 1H, (CH<sub>3</sub>)<sub>2</sub>CHO), 3.81 (dd, *J* = 22.0, 5.7 Hz, 6H, OCH<sub>3</sub>), 2.14 (d, *J* = 6.2 Hz, 1H, (CH<sub>3</sub>)<sub>2</sub>CHCH), 1.25 – 1.08 (m, 6H, (CH<sub>3</sub>)<sub>2</sub>CHO), 1.01 – 0.80 (m, 6H, (CH<sub>3</sub>)<sub>2</sub>CHCH). <sup>13</sup>C NMR (101 MHz, CDCl<sub>3</sub>) δ 170.67, 149.08, 148.35, 128.61, 127.49, 127.42, 127.27, 119.46, 111.10, 110.87, 68.69, 56.59, 55.89, 55.82, 30.85, 22.01, 19.40. HRMS calcd for C<sub>24</sub>H<sub>32</sub>N<sub>2</sub>O<sub>5</sub> ([M + H]): 428.2382; Found: 428.2311.

**Isopropyl((2S)-1-(((3,4-dimethoxyphenyl)(4-fluorophenyl)methyl)amino)-3-methyl-1-oxobutan-2-yl)carbamate 9b.** white solid, mp 169 - 171 °C. <sup>1</sup>H NMR (400 MHz, CDCl<sub>3</sub>) δ 7.32 – 7.22 (m, 1H, Ph-H), 7.19 (t, *J* = 6.8 Hz, 1H, Ph-H), 7.16 – 7.07 (m, 2H, Ph-H), 6.93 (t, *J* = 8.6 Hz, 1H, Ph-H), 6.67 (m, 1H, Ph-H), 6.11 (d, *J* = 8.4 Hz, 1H, Ph-H), 5.13 (s, 1H, Ph-CH-Ph), 4.74 (s, 1H, COCHNH), 3.94 (d, *J* = 6.0 Hz, 1H, (CH<sub>3</sub>)<sub>2</sub>CHO), 3.75 (s, 6H, OCH<sub>3</sub>), 2.08 (s, 1H, (CH<sub>3</sub>)<sub>2</sub>CHCH), 1.30 – 1.03 (m, 6H, (CH<sub>3</sub>)<sub>2</sub>CHO), 1.01 – 0.72 (m, 6H, (CH<sub>3</sub>)<sub>2</sub>CHCH). <sup>13</sup>C NMR (101 MHz, CDCl<sub>3</sub>) δ 171.03, 156.56, 149.07, 129.08, 128.88, 128.56, 127.45, 127.27, 119.41, 115.49, 115.28, 111.02, 110.83, 68.72, 63.77, 60.45, 55.88, 55.80, 53.52, 30.90, 21.99, 19.37. HRMS calcd for C<sub>24</sub>H<sub>31</sub>FN<sub>2</sub>O<sub>5</sub> ([M + Na]): 446.2105; Found: 446.2217.

**Isopropyl((2S)-1-(((3,4-dimethoxyphenyl)(4-chlorophenyl)methyl)amino)-3-methyl-1-oxobutan-2-yl)carbamate 9c.** white solid, mp 182 - 184 °C. <sup>1</sup>H NMR (400 MHz, CDCl<sub>3</sub>) δ 7.45 – 7.22 (m, 2H, Ar-H), 7.16 (d, *J* = 7.8 Hz, 2H, Ar-H), 6.79 (dd, *J* = 8.0, 3.5 Hz, 1H, Ar-H), 6.74 – 6.65 (m, 2H, Ar-H), 6.61 (d, *J* = 7.4 Hz, 1H, CHNHCO), 6.14 (d, *J* = 7.8 Hz, 1H, Ar-CHNH), 5.08 (s, 1H, Ar-CH-Ar), 4.91 – 4.76 (m, 1H, COCHNH), 3.97 (dd, *J* = 13.9, 7.0 Hz, 1H, (CH<sub>3</sub>)<sub>2</sub>CHO), 3.83 (d, *J* = 18.9 Hz, 6H, OCH<sub>3</sub>), 3.10 (d, *J* = 6.0 Hz, 1H, (CH<sub>3</sub>)<sub>2</sub>CHCH), 1.20 (dd, *J* = 12.6, 6.1 Hz, 6H, (CH<sub>3</sub>)<sub>2</sub>CHO), 0.94 (dd, *J* = 16.5, 6.2 Hz, 6H, (CH<sub>3</sub>)<sub>2</sub>CHCH). <sup>13</sup>C NMR (101 MHz, CDCl<sub>3</sub>) δ 170.84, 155.57, 149.13, 148.51, 139.81, 133.23, 128.79, 128.70, 119.73, 119.50, 111.06, 110.81, 68.73, 60.45, 55.99, 55.89, 55.85, 45.94, 30.83, 22.00, 19.41. HRMS calcd for C<sub>24</sub>H<sub>31</sub>ClN<sub>2</sub>O<sub>5</sub> ([M + H]): 462.1995; Found: 462.1922.

**Isopropyl((2S)-1-(((3,4-dimethoxyphenyl)(4-bromophenyl)methyl)amino)-3-methyl-1-oxobutan-2-yl)carbamate 9d.** white solid, mp 180 - 182 °C. <sup>1</sup>H NMR (400 MHz, CDCl<sub>3</sub>) δ 7.45 – 7.22 (m, 2H, Ph-H), 7.16 (d, *J* = 7.8 Hz, 2H, Ph-H), 6.79 (dd, *J* = 8.0, 3.5 Hz, 1H, Ph-H), 6.74 – 6.65 (m, 2H, Ph-H), 6.61 (d, *J* = 7.4 Hz, 1H, CHNHCO), 6.14 (d, *J* = 7.8 Hz, 1H, Ph-CHNH), 5.08 (s, 1H, Ph-CH-Ph), 4.91 – 4.76 (m, 1H, COCHNH), 3.97 (dd, *J* = 13.9, 7.0 Hz, 1H, (CH<sub>3</sub>)<sub>2</sub>CHO), 3.83 (d, *J* = 18.9 Hz, 6H, OCH<sub>3</sub>), 3.10 (d, *J* = 6.0 Hz, 1H, (CH<sub>3</sub>)<sub>2</sub>CHCH), 1.20 (dd, *J* = 12.6, 6.1 Hz, 6H, (CH<sub>3</sub>)<sub>2</sub>CHO), 0.94 (dd, *J* = 16.5, 6.2 Hz, 6H, (CH<sub>3</sub>)<sub>2</sub>CHCH). <sup>13</sup>C NMR (101

MHz, CDCl<sub>3</sub>) δ 171.04, 156.32, 148.58, 148.29, 140.84, 133.38, 131.45, 129.18, 121.02, 119.69, 112.41, 111.29, 68.45, 64.31, 63.69, 55.92, 53.37, 43.76, 31.08, 22.00, 19.39, 17.93, 14.71. HRMS calcd for C<sub>24</sub>H<sub>31</sub>BrN<sub>2</sub>O<sub>5</sub> ([M + H]): 506.1483; Found: 506.1416.

**Isopropyl((2S)-1-(((3,4-dimethoxyphenyl)(4-methylphenyl)methyl)amino)-3-methyl-1-oxobutan-2-yl)carbamate 9e.** white solid, mp 184 - 185 °C. <sup>1</sup>H NMR (400 MHz, CDCl<sub>3</sub>) δ 7.10 (t, *J* = 7.3 Hz, 4H, Ph-H), 6.76 (dt, *J* = 13.6, 6.4 Hz, 3H, Ph-H), 6.56 (d, *J* = 7.2 Hz, 1H, CHNHCO), 6.14 (d, *J* = 7.4 Hz, 1H, Ph-CHNH), 5.12 (s, 1H, Ph-CH-Ph), 4.85 (d, *J* = 5.5 Hz, 1H, COCHNH), 4.09 – 3.93 (m, 1H, (CH<sub>3</sub>)<sub>2</sub>CHO), 3.83 (d, *J* = 17.6 Hz, 6H, OCH<sub>3</sub>), 2.33 (s, 3H, Ph-CH<sub>3</sub>), 2.16 (s, 1H, (CH<sub>3</sub>)<sub>2</sub>CHCH), 1.22 (t, *J* = 12.3 Hz, 6H, (CH<sub>3</sub>)<sub>2</sub>CHO), 0.94 (dd, *J* = 18.8, 6.5 Hz, 6H, (CH<sub>3</sub>)<sub>2</sub>CHCH). <sup>13</sup>C NMR (101 MHz, CDCl<sub>3</sub>) δ 170.86, 156.50, 148.97, 148.22, 138.28, 137.14, 134.13, 129.28, 128.53, 127.77, 127.23, 119.39, 110.99, 110.75, 68.69, 63.76, 60.42, 58.74, 56.39, 55.82, 53.48, 43.83, 30.94, 22.02, 21.07, 19.41, 19.08, 18.00, 17.40. HRMS calcd for C<sub>25</sub>H<sub>34</sub>N<sub>2</sub>O<sub>5</sub> ([M + Na]): 442.2362; Found: 442.2468.

**Isopropyl((2S)-1-(((3,4-dimethoxyphenyl)((4-(tert-butyl)phenyl)methyl)amino)-3-methyl-1-oxobutan-2-yl)carbamate 9f.** white solid, mp 145 - 146 °C. <sup>1</sup>H NMR (400 MHz, CDCl<sub>3</sub>) δ 7.40 – 7.21 (m, 2H, Ph-H), 7.12 (d, *J* = 7.9 Hz, 2H, Ph-H), 6.76 (dd, *J* = 17.5, 8.8 Hz, 3H, Ph-H), 6.64 (s, 1H, CHNHCO), 6.15 (d, *J* = 6.7 Hz, 1H, Ph-CHNH), 5.14 (s, 1H, Ph-CH-Ph), 4.84 (s, 1H, COCHNH), 4.00 (s, 1H, (CH<sub>3</sub>)<sub>2</sub>CHO), 3.83 (s, 6H, OCH<sub>3</sub>), 2.17 (s, 1H, (CH<sub>3</sub>)<sub>2</sub>CHCH), 1.30 (s, 9H, Ph-C(CH<sub>3</sub>)<sub>3</sub>), 1.19 (d, *J* = 9.0 Hz, 6H, (CH<sub>3</sub>)<sub>2</sub>CHO), 1.07 – 0.80 (m, 6H, (CH<sub>3</sub>)<sub>2</sub>CHCH). <sup>13</sup>C NMR (101 MHz, CDCl<sub>3</sub>) δ 169.68, 155.38, 149.28, 147.96, 147.17, 137.51, 133.13, 126.12, 124.44, 118.35, 110.00, 67.54, 59.34, 55.18, 54.75, 33.44, 30.28, 20.97, 18.40. HRMS calcd for C<sub>28</sub>H<sub>40</sub>N<sub>2</sub>O<sub>5</sub> ([M + H]): 484.3006; Found: 484.2937.

**Isopropyl((2S)-1-(((3,4-dimethoxy)(4-methoxyphenyl)methyl)amino)-3-methyl-1-oxobutan-2-yl)carbamate 9g.** white solid, mp 184 - 186 °C. <sup>1</sup>H NMR (400 MHz, CDCl<sub>3</sub>) δ 7.10 (d, *J* = 8.4 Hz, 2H, Ph-H), 6.87 (s, 1H, Ph-H), 6.82 (d, *J* = 8.6 Hz, 1H, Ph-H), 6.74 (m, 3H, Ph-H), 6.12 (d, *J* = 7.8 Hz, 1H, Ph-CHNH), 5.24 (d, *J* = 8.5 Hz, 1H, Ph-CH-Ph), 4.72 (s, 1H, COCHNH), 4.04 (d, *J* = 6.5 Hz, 1H, (CH<sub>3</sub>)<sub>2</sub>CHO), 3.83 (d, *J* = 7.4 Hz, 3H, OCH<sub>3</sub>), 3.77 (s, 6H, OCH<sub>3</sub>), 2.17 – 2.03 (m, 1H, (CH<sub>3</sub>)<sub>2</sub>CHCH), 1.16 (dd, *J* = 11.5, 5.6 Hz, 6H, (CH<sub>3</sub>)<sub>2</sub>CHO), 0.99 – 0.83 (m, 6H, (CH<sub>3</sub>)<sub>2</sub>CHCH). <sup>13</sup>C NMR (101 MHz, CDCl<sub>3</sub>) δ 170.65, 156.41, 149.00, 148.22, 128.66, 128.49, 119.27, 113.94, 111.02, 110.76, 110.64, 68.62, 60.45, 55.87, 55.79, 55.27, 30.96, 22.02, 19.39. HRMS calcd for C<sub>25</sub>H<sub>34</sub>N<sub>2</sub>O<sub>6</sub> ([M + H]): 458.2482; Found: 458.2417.

**isopropyl((2S)-1-(((4-ethoxy-3-methoxyphenyl)(phenyl)methyl)amino)-3-methyl-1-oxobutan-2-yl)carbamate 9h.** white solid, mp 142 - 144 °C. <sup>1</sup>H NMR (400 MHz, CDCl<sub>3</sub>) δ 7.36 – 7.24 (m, 3H, Ph-H), 7.21 (d, *J* = 7.1 Hz, 2H, Ph-H), 6.77 (dd, *J* = 11.6, 8.6 Hz, 2H, Ph-H), 6.69 (d, *J* = 5.8 Hz, 1H, Ph-H), 6.17 (d, *J* = 7.6 Hz, 1H, CHNHCO), 5.17 (d, *J* = 7.7 Hz, 1H, Ph-CHNH), 4.85 (d, *J* = 6.3 Hz, 1H, Ph-CH-Ph), 4.14 – 4.03 (m, 2H, CH<sub>3</sub>CH<sub>2</sub>O), 4.02 – 3.92 (m, 1H, COCHNH), 3.79 (s, 3H, OCH<sub>3</sub>), 3.21 – 2.92 (m, 1H, (CH<sub>3</sub>)<sub>2</sub>CHO), 2.15 (m, 1H, (CH<sub>3</sub>)<sub>2</sub>CHCH), 1.44 (t, *J* = 7.0 Hz, 3H, CH<sub>3</sub>CH<sub>2</sub>O), 1.20 (dd, *J* = 12.7, 6.6 Hz, 6H, (CH<sub>3</sub>)<sub>2</sub>CHO), 0.93 (dd, *J* = 17.8, 6.3 Hz, 6H, (CH<sub>3</sub>)<sub>2</sub>CHCH). <sup>13</sup>C NMR (101 MHz, CDCl<sub>3</sub>) δ 169.85, 155.42, 147.54, 147.28, 133.05, 127.48, 126.28, 118.75, 118.48, 111.36, 110.29, 67.49, 63.18, 59.28, 54.89, 44.67, 29.88, 20.98, 18.36, 13.71. HRMS calcd for C<sub>25</sub>H<sub>34</sub>N<sub>2</sub>O<sub>5</sub> ([M + H]): 442.2540; Found: 442.2468.

**Isopropyl((2S)-1-(((4-ethoxy-3-methoxyphenyl)(4-fluorophenyl)methyl)amino)-3-methyl-1-oxobutan-2-yl)carbamate 9i.** white solid, mp 176 - 177 °C. <sup>1</sup>H NMR (400 MHz, CDCl<sub>3</sub>) δ 7.17 (dd, *J* = 8.2, 5.2 Hz, 2H, Ph-H), 6.99 (dd, *J* = 18.0, 9.0 Hz, 2H, Ph-H), 6.78 (dd, *J* = 8.2, 5.5 Hz,



1H, Ph-H), 6.71 (s, 1H, Ph-H), 6.68 – 6.61 (m, 1H, Ph-H), 6.15 (d,  $J = 7.8$  Hz, 1H, Ph-CHNH), 5.18 (d,  $J = 8.6$  Hz, 1H, Ph-CH-Ph), 4.80 (s, 1H, COCHNH), 4.12 – 4.02 (m, 2H, CH<sub>3</sub>CH<sub>2</sub>O), 3.99 (dd,  $J = 12.7, 7.3$  Hz, 1H, (CH<sub>3</sub>)<sub>2</sub>CHO), 3.78 (d,  $J = 3.2$  Hz, 3H, OCH<sub>3</sub>), 2.14 (s, 1H, (CH<sub>3</sub>)<sub>2</sub>CHCH), 1.44 (td,  $J = 6.9, 2.4$  Hz, 3H, CH<sub>3</sub>CH<sub>2</sub>O), 1.19 (dd,  $J = 11.7, 5.7$  Hz, 6H, (CH<sub>3</sub>)<sub>2</sub>CHO), 0.98 – 0.86 (m, 6H, (CH<sub>3</sub>)<sub>2</sub>CHCH). <sup>13</sup>C NMR (101 MHz, CDCl<sub>3</sub>) δ 170.96, 163.22, 160.78, 156.51, 149.33, 147.75, 129.11, 128.95, 119.37, 115.46, 115.25, 112.40, 111.12, 68.68, 64.28, 60.42, 55.84, 30.98, 21.98, 19.36, 18.16, 14.79. HRMS calcd for C<sub>25</sub>H<sub>33</sub>FN<sub>2</sub>O<sub>5</sub> ([M + H]): 460.2446; Found: 460.2374.

**Isopropyl((2S)-1-(((4-ethoxyl-3-methoxyphenyl)(4-chlorophenyl)methyl)amino)-3-methyl-1-oxobutan-2-yl)carbamate 9j.** white solid, mp 186 - 187 °C. <sup>1</sup>H NMR (400 MHz, CDCl<sub>3</sub>) δ 7.17 (dd,  $J = 8.2, 5.2$  Hz, 2H, Ph-H), 6.99 (dd,  $J = 18.0, 9.0$  Hz, 2H, Ph-H), 6.78 (dd,  $J = 8.2, 5.5$  Hz, 1H, Ph-H), 6.71 (s, 1H, Ph-H), 6.68 – 6.61 (m, 1H, Ph-H), 6.15 (d,  $J = 7.8$  Hz, 1H, Ph-CHNH), 5.18 (d,  $J = 8.6$  Hz, 1H, Ph-CH-Ph), 4.80 (s, 1H, COCHNH), 4.12 – 4.02 (m, 2H, CH<sub>3</sub>CH<sub>2</sub>O), 3.99 (dd,  $J = 12.7, 7.3$  Hz, 1H, (CH<sub>3</sub>)<sub>2</sub>CHO), 3.78 (d,  $J = 3.2$  Hz, 3H, OCH<sub>3</sub>), 2.14 (s, 1H, (CH<sub>3</sub>)<sub>2</sub>CHCH), 1.44 (td,  $J = 6.9, 2.4$  Hz, 3H, CH<sub>3</sub>CH<sub>2</sub>O), 1.19 (dd,  $J = 11.7, 5.7$  Hz, 6H, (CH<sub>3</sub>)<sub>2</sub>CHO), 0.98 – 0.86 (m, 6H, (CH<sub>3</sub>)<sub>2</sub>CHCH). <sup>13</sup>C NMR (101 MHz, CDCl<sub>3</sub>) δ 170.95, 148.36, 140.33, 133.49, 132.96, 128.72, 128.56, 119.72, 112.30, 111.30, 68.55, 64.29, 63.69, 55.92, 53.39, 43.74, 31.03, 21.99, 19.39, 18.01, 17.83, 14.72. HRMS calcd for C<sub>25</sub>H<sub>33</sub>ClN<sub>2</sub>O<sub>5</sub> ([M + H]): 476.2150; Found: 476.2078.

**Isopropyl((2S)-1-(((4-ethoxyl-3-methoxyphenyl)(4-methylphenyl)methyl)amino)-3-methyl-1-oxobutan-2-yl)carbamate 9k.** white solid, mp 174 - 176 °C. <sup>1</sup>H NMR (400 MHz, CDCl<sub>3</sub>) δ 7.19 – 7.01 (m, 4H, Ph-H), 6.76 (dd,  $J = 13.3, 6.0$  Hz, 2H, Ph-H), 6.69 (d,  $J = 7.8$  Hz, 1H, Ph-H), 6.13 (d,  $J = 7.6$  Hz, 1H, CHNHCO), 5.19 (d,  $J = 5.6$  Hz, 1H, Ph-CHNH), 4.78 (s, 1H, Ph-CH-Ph), 4.06 (dd,  $J = 12.6, 6.8$  Hz, 2H, COCHNH), 4.02 – 3.97 (m, 1H, (CH<sub>3</sub>)<sub>2</sub>CHO), 3.78 (d,  $J = 4.7$  Hz, 3H, OCH<sub>3</sub>), 2.31 (d,  $J = 4.9$  Hz, 3H, Ph-CH<sub>3</sub>), 2.13 (s, 1H, (CH<sub>3</sub>)<sub>2</sub>CHCH), 1.43 (td,  $J = 6.9, 3.1$  Hz, 3H, CH<sub>3</sub>CH<sub>2</sub>O), 1.18 (dd,  $J = 9.8, 6.0$  Hz, 6H, (CH<sub>3</sub>)<sub>2</sub>CHO), 0.92 (dd,  $J = 17.3, 6.5$  Hz, 6H, (CH<sub>3</sub>)<sub>2</sub>CHCH). <sup>13</sup>C NMR (101 MHz, CDCl<sub>3</sub>) δ 170.76, 156.43, 149.23, 147.54, 137.03, 129.23, 127.44, 127.22, 119.69, 119.33, 112.40, 111.12, 68.55, 64.24, 60.37, 56.24, 55.83, 22.01, 21.08, 19.38, 14.82. HRMS calcd for C<sub>26</sub>H<sub>36</sub>N<sub>2</sub>O<sub>5</sub> ([M + H]): 456.2695; Found: 456.2624.

**Isopropyl((2S)-1-(((3-methoxy-4-(prop-2-yn-1-yloxy)phenyl)(p-tolyl)methyl)amino)-3-methyl-1-oxobutan-2-yl)carbamate 9l.** white solid, mp 181 - 182 °C. <sup>1</sup>H NMR (400 MHz, CDCl<sub>3</sub>) δ 7.15 – 7.04 (m, 4H, Ph-H), 6.95 (dd,  $J = 8.3, 3.2$  Hz, 1H, Ph-H), 6.78 (s, 1H, Ph-H), 6.72 (dd,  $J = 8.0, 2.7$  Hz, 1H, Ph-H), 6.13 (d,  $J = 7.8$  Hz, 1H, Ph-CH-Ph), 5.15 (d,  $J = 8.3$  Hz, 1H, COCHNH), 4.90 – 4.79 (m, 1H, (CH<sub>3</sub>)<sub>2</sub>CHO), 4.72 (t,  $J = 2.2$  Hz, 2H, CH<sub>2</sub>CCH), 3.79 (s, 3H, OCH<sub>3</sub>), 2.49 (t,  $J = 2.1$  Hz, 1H, CH<sub>2</sub>CCH), 2.31 (s, 3H, Ar-CH<sub>3</sub>), 2.15 (m, 1H, (CH<sub>3</sub>)<sub>2</sub>CHCH), 1.19 (dd,  $J = 11.8, 5.6$  Hz, 6H, (CH<sub>3</sub>)<sub>2</sub>CHO), 0.97 – 0.86 (m, 6H, (CH<sub>3</sub>)<sub>2</sub>CHCH). <sup>13</sup>C NMR (101 MHz, CDCl<sub>3</sub>) δ 170.85, 156.41, 149.59, 145.95, 137.10, 135.68, 129.25, 127.32, 119.36, 114.04, 111.28, 78.57, 75.87, 68.58, 63.74, 60.31, 55.84, 53.39, 22.01, 21.04, 19.39. HRMS calcd for C<sub>27</sub>H<sub>34</sub>N<sub>2</sub>O<sub>5</sub> ([M + H]): 466.2535; Found: 466.2468.

**Isopropyl((2S)-1-(((4-(benzyloxy)-3-methoxyphenyl)(4-fluorophenyl)methyl)amino)-3-methyl-1-oxobutan-2-yl)carbamate 9m.** white solid, mp 177 - 179 °C. <sup>1</sup>H NMR (400 MHz, CDCl<sub>3</sub>) δ 7.44 (d,  $J = 7.1$  Hz, 2H, Ph-H), 7.38 (t,  $J = 7.3$  Hz, 2H, Ph-H), 7.35 – 7.24 (m, 2H, Ph-H), 7.19 (dd,  $J = 12.1, 5.2$  Hz, 2H, Ph-H), 7.00 (dd,  $J = 18.8, 8.7$  Hz, 2H, Ph-H), 6.80 (dd,  $J = 17.9, 10.8$  Hz, 2H, Ph-H), 6.63 (s, 1H, CHNHCO), 6.16 (d,  $J = 7.7$  Hz, 1H, Ph-CHNH), 5.20 (d,  $J = 7.9$

Hz, 1H, Ph-CH-Ph), 5.14 (d,  $J = 5.1$  Hz, 2H, OCH<sub>2</sub>-Ph), 4.80 (s, 1H, COCHNH), 4.02 (t,  $J = 7.4$  Hz, 1H, (CH<sub>3</sub>)<sub>2</sub>CHO), 3.83 (s, 3H, OCH<sub>3</sub>), 2.16 (s, 1H, (CH<sub>3</sub>)<sub>2</sub>CHCH), 1.20 (dd,  $J = 14.9, 5.7$  Hz, 6H, (CH<sub>3</sub>)<sub>2</sub>CHO), 1.03 – 0.84 (m, 6H, (CH<sub>3</sub>)<sub>2</sub>CHCH). <sup>13</sup>C NMR (101 MHz, CDCl<sub>3</sub>) δ 170.92, 170.87, 160.70, 156.42, 149.66, 147.51, 137.00, 134.36, 134.24, 129.07, 128.55, 127.88, 127.26, 119.59, 115.42, 115.21, 113.72, 111.42, 70.98, 63.73, 55.99, 53.45, 43.83, 30.97, 22.01, 19.40. HRMS calcd for C<sub>30</sub>H<sub>35</sub>FN<sub>2</sub>O<sub>5</sub> ([M + Na]): 522.2415; Found: 522.2530.

**Isopropyl((2S)-1-(((4-(benzyloxy)-3-methoxyphenyl)(4-chlorophenyl)methyl)amino)-3-methyl-1-oxobutan-2-yl)carbamate 9n.** white solid, mp 193 - 195 °C. <sup>1</sup>H NMR (400 MHz, CDCl<sub>3</sub>) δ 7.41 (d,  $J = 7.5$  Hz, 2H, Ph-H), 7.35 (t,  $J = 7.3$  Hz, 2H, Ph-H), 7.32 – 7.22 (m, 3H, Ph-H), 7.13 (dd,  $J = 8.1, 4.4$  Hz, 2H, Ph-H), 6.85 – 6.75 (m, 2H, Ph-H), 6.73 (s, 1H, Ph-H), 6.59 (d,  $J = 8.2$  Hz, 1H, CHNHCO), 6.12 (d,  $J = 7.3$  Hz, 1H, Ph-CHNH), 5.20 (d,  $J = 8.4$  Hz, 1H, Ph-CH-Ph), 5.12 (d,  $J = 4.8$  Hz, 2H, OCH<sub>2</sub>-Ph), 4.79 (s, 1H, COCHNH), 3.99 (dd,  $J = 13.3, 6.6$  Hz, 1H, (CH<sub>3</sub>)<sub>2</sub>CHO), 3.80 (d,  $J = 3.3$  Hz, 3H, OCH<sub>3</sub>), 2.13 (s, 1H, (CH<sub>3</sub>)<sub>2</sub>CHCH), 1.26 – 1.07 (m, 6H, (CH<sub>3</sub>)<sub>2</sub>CHO), 0.99 – 0.80 (m, 6H, (CH<sub>3</sub>)<sub>2</sub>CHCH). <sup>13</sup>C NMR (101 MHz, CDCl<sub>3</sub>) δ 169.98, 155.48, 148.67, 146.62, 138.65, 135.92, 133.00, 132.17, 127.81, 127.60, 127.53, 126.87, 126.19, 118.36, 112.64, 110.35, 69.90, 67.70, 59.40, 54.90, 20.95, 18.34, 17.12. HRMS calcd for C<sub>30</sub>H<sub>35</sub>ClN<sub>2</sub>O<sub>5</sub> ([M + H]): 538.2304; Found: 538.2234.

**Isopropyl((2S)-1-(((4-(benzyloxy)-3-methoxyphenyl)(4-bromophenyl)methyl)amino)-3-methyl-1-oxobutan-2-yl)carbamate 9o.** white solid, mp 164 - 165 °C. <sup>1</sup>H NMR (400 MHz, CDCl<sub>3</sub>) δ 7.41 (d,  $J = 7.5$  Hz, 2H, Ph-H), 7.35 (t,  $J = 7.3$  Hz, 2H, Ph-H), 7.32 – 7.22 (m, 3H, Ph-H), 7.13 (dd,  $J = 8.1, 4.4$  Hz, 2H, Ph-H), 6.85 – 6.75 (m, 2H, Ph-H), 6.73 (s, 1H, Ph-H), 6.59 (d,  $J = 8.2$  Hz, 1H, CHNHCO), 6.12 (d,  $J = 7.3$  Hz, 1H, Ph-CHNH), 5.20 (d,  $J = 8.4$  Hz, 1H, Ph-CH-Ph), 5.12 (d,  $J = 4.8$  Hz, 2H, OCH<sub>2</sub>-Ph), 4.79 (s, 1H, COCHNH), 3.99 (dd,  $J = 13.3, 6.6$  Hz, 1H, (CH<sub>3</sub>)<sub>2</sub>CHO), 3.80 (d,  $J = 3.3$  Hz, 3H, OCH<sub>3</sub>), 2.13 (s, 1H, (CH<sub>3</sub>)<sub>2</sub>CHCH), 1.26 – 1.07 (m, 6H, (CH<sub>3</sub>)<sub>2</sub>CHO), 0.99 – 0.80 (m, 6H, (CH<sub>3</sub>)<sub>2</sub>CHCH). <sup>13</sup>C NMR (101 MHz, CDCl<sub>3</sub>) δ 171.06, 156.46, 149.61, 147.44, 136.98, 134.61, 134.03, 131.56, 129.21, 129.10, 128.56, 127.89, 127.27, 113.68, 111.41, 70.97, 63.71, 55.98, 53.37, 43.68, 31.05, 22.02, 19.41. HRMS calcd for C<sub>30</sub>H<sub>35</sub>BrN<sub>2</sub>O<sub>5</sub> ([M + H]): 582.1796; Found: 582.1729.

**Isopropyl((2S)-1-(((4-(benzyloxy)-3-methoxyphenyl)(p-tolyl)methyl)amino)-3-methyl-1-oxobutan-2-yl)carbamate 9p.** white solid, mp 168 - 170 °C. <sup>1</sup>H NMR (400 MHz, CDCl<sub>3</sub>) δ 7.45 (d,  $J = 7.3$  Hz, 1H, Ph-H), 7.38 (t,  $J = 7.3$  Hz, 2H, Ph-H), 7.35 – 7.27 (m, 1H, Ph-H), 7.12 (t,  $J = 7.3$  Hz, 4H, Ph-H), 6.87 – 6.78 (m, 2H, Ph-H), 6.67 (d,  $J = 8.2$  Hz, 2H, Ph-H), 6.16 (d,  $J = 7.7$  Hz, 1H, Ph-CH-Ph), 5.15 (d,  $J = 2.4$  Hz, 2H, OCH<sub>2</sub>-Ph), 4.86 (d,  $J = 6.0$  Hz, 1H, COCHNH), 4.01 (d,  $J = 7.0$  Hz, 1H, (CH<sub>3</sub>)<sub>2</sub>CHO), 3.84 (s, 3H, OCH<sub>3</sub>), 2.35 (d,  $J = 2.7$  Hz, 3H, Ph-CH<sub>3</sub>), 2.20 (s, 1H, (CH<sub>3</sub>)<sub>2</sub>CHCH), 1.22 (d,  $J = 6.5$  Hz, 6H, (CH<sub>3</sub>)<sub>2</sub>CHO), 0.96 (dd,  $J = 18.4, 6.5$  Hz, 6H, (CH<sub>3</sub>)<sub>2</sub>CHCH). <sup>13</sup>C NMR (101 MHz, CDCl<sub>3</sub>) δ 169.98, 155.48, 148.67, 146.62, 135.92, 127.81, 127.64, 127.60, 127.53, 126.87, 126.19, 118.36, 112.64, 110.35, 69.92, 69.88, 67.70, 59.40, 54.90, 29.85, 20.95, 18.34. HRMS calcd for C<sub>31</sub>H<sub>38</sub>N<sub>2</sub>O<sub>5</sub> ([M + Na]): 518.2670; Found: 518.2781.

**Isopropyl((2S)-1-(((3-ethoxy-4-methoxyphenyl)(phenyl)methyl)amino)-3-methyl-1-oxobutan-2-yl)carbamate 9q.** white solid, mp 178 - 180 °C. <sup>1</sup>H NMR (400 MHz, CDCl<sub>3</sub>) δ 7.38 – 7.09 (m, 5H, Ph-H), 6.84 – 6.64 (m, 3H, Ph-H), 6.16 (d,  $J = 8.0$  Hz, 1H, Ph-CH-Ph), 5.20 (d,  $J = 43.2$  Hz, 1H, COCHNH), 4.89 – 4.73 (m, 1H, (CH<sub>3</sub>)<sub>2</sub>CHO), 3.99 (dd,  $J = 14.1, 7.0$  Hz, 2H, CH<sub>3</sub>CH<sub>2</sub>O), 3.83 (dd,  $J = 7.5, 4.2$  Hz, 3H, OCH<sub>3</sub>), 2.28 – 1.99 (s, 1H, (CH<sub>3</sub>)<sub>2</sub>CHCH), 1.51 – 1.32 (m, 3H, CH<sub>3</sub>CH<sub>2</sub>O), 1.20 (dd,  $J = 11.7, 5.3$  Hz, 6H, (CH<sub>3</sub>)<sub>2</sub>CHO), 0.93 (dd,  $J = 16.6, 9.3$  Hz, 6H,

(CH<sub>3</sub>)<sub>2</sub>CHCH). <sup>13</sup>C NMR (101 MHz, CDCl<sub>3</sub>) δ 169.85, 155.42, 147.54, 147.28, 133.05, 127.48, 126.28, 118.75, 118.48, 111.36, 110.29, 67.49, 63.18, 59.28, 54.89, 44.67, 29.88, 20.98, 18.36, 13.71. HRMS calcd for C<sub>25</sub>H<sub>34</sub>N<sub>2</sub>O<sub>5</sub> ([M + H]): 442.2541; Found: 442.2468.

**Isopropyl((2S)-1-(((3-ethoxy-4-methoxyphenyl)(4-fluorophenyl)methyl)amino)-3-methyl-1-oxobutan-2-yl)carbamate 9r.** white solid, mp 194 - 195 °C. <sup>1</sup>H NMR (400 MHz, CDCl<sub>3</sub>) δ 7.32 – 7.22 (d, *J* = 7.5 Hz, 2H, Ph-H), 7.16 (d, *J* = 8.2 Hz, 2H, Ph-H), 6.81 – 6.74 (m, 1H, Ph-H), 6.73 (s, 1H, Ph-H), 6.67 (s, 1H, Ph-H), 6.12 (d, *J* = 7.9 Hz, 1H, CHNHCO), 5.20 (s, 1H, Ph-CHNH), 4.79 (s, 1H, Ph-CH-Ph), 4.18 (s, 1H, COCHNH), 4.04 (dd, *J* = 6.9, 3.9 Hz, 2H, CH<sub>3</sub>CH<sub>2</sub>O), 3.98 (s, 1H, (CH<sub>3</sub>)<sub>2</sub>CHO), 3.78 (s, 3H, OCH<sub>3</sub>), 2.12 (m, 1H, (CH<sub>3</sub>)<sub>2</sub>CHCH), 1.42 (t, *J* = 6.8, 3H, CH<sub>3</sub>CH<sub>2</sub>O), 1.18 (dd, *J* = 9.3, 6.1 Hz, 6H, (CH<sub>3</sub>)<sub>2</sub>CHO), 0.91 (dd, *J* = 13.0, 5.1 Hz, 6H, (CH<sub>3</sub>)<sub>2</sub>CHCH). <sup>13</sup>C NMR (101 MHz, CDCl<sub>3</sub>) δ 170.91, 163.12, 160.65, 156.39, 148.32, 137.57, 133.78, 129.00, 119.65, 115.15, 112.27, 111.27, 64.26, 63.70, 55.86, 53.39, 43.73, 31.05, 21.98, 19.36, 14.71. HRMS calcd for C<sub>25</sub>H<sub>33</sub>FN<sub>2</sub>O<sub>5</sub> ([M + H]): 460.2446; Found: 460.2374.

**Isopropyl((2S)-1-(((3-ethoxy-4-methoxyphenyl)(4-chlorophenyl)methyl)amino)-3-methyl-1-oxobutan-2-yl)carbamate 9s.** white solid, mp 176 - 178 °C. <sup>1</sup>H NMR (400 MHz, CDCl<sub>3</sub>) δ 7.32 – 7.22 (d, *J* = 7.5 Hz, 2H, Ph-H), 7.16 (d, *J* = 8.2 Hz, 2H, Ph-H), 6.81 – 6.74 (m, 1H, Ph-H), 6.73 (s, 1H, Ph-H), 6.67 (s, 1H, Ph-H), 6.12 (d, *J* = 7.9 Hz, 1H, CHNHCO), 5.20 (s, 1H, Ph-CHNH), 4.79 (s, 1H, Ph-CH-Ph), 4.18 (s, 1H, COCHNH), 4.04 (dd, *J* = 6.9, 3.9 Hz, 2H, CH<sub>3</sub>CH<sub>2</sub>O), 3.98 (s, 1H, (CH<sub>3</sub>)<sub>2</sub>CHO), 3.78 (s, 3H, OCH<sub>3</sub>), 2.12 (m, 1H, (CH<sub>3</sub>)<sub>2</sub>CHCH), 1.42 (t, *J* = 6.8, 3H, CH<sub>3</sub>CH<sub>2</sub>O), 1.18 (dd, *J* = 9.3, 6.1 Hz, 6H, (CH<sub>3</sub>)<sub>2</sub>CHO), 0.91 (dd, *J* = 13.0, 5.1 Hz, 6H, (CH<sub>3</sub>)<sub>2</sub>CHCH). <sup>13</sup>C NMR (101 MHz, CDCl<sub>3</sub>) δ 171.03, 156.46, 149.31, 147.72, 140.31, 133.45, 133.07, 128.81, 128.58, 119.75, 119.58, 112.37, 64.27, 63.71, 55.92, 53.41, 43.74, 31.04, 21.99, 19.39, 14.77. HRMS calcd for C<sub>25</sub>H<sub>33</sub>ClN<sub>2</sub>O<sub>5</sub> ([M + H]): 476.2150; Found: 476.2078.

**Isopropyl((2S)-1-(((3-ethoxy-4-methoxyphenyl)(4-bromophenyl)methyl)amino)-3-methyl-1-oxobutan-2-yl)carbamate 9t.** white solid, mp 190 - 192 °C. <sup>1</sup>H NMR (400 MHz, CDCl<sub>3</sub>) δ 7.32 – 7.22 (d, *J* = 7.5 Hz, 2H, Ph-H), 7.16 (d, *J* = 8.2 Hz, 2H, Ph-H), 6.81 – 6.74 (m, 1H, Ph-H), 6.73 (s, 1H, Ph-H), 6.67 (s, 1H, Ph-H), 6.12 (d, *J* = 7.9 Hz, 1H, CHNHCO), 5.20 (s, 1H, Ph-CHNH), 4.79 (s, 1H, Ph-CH-Ph), 4.18 (s, 1H, COCHNH), 4.04 (dd, *J* = 6.9, 3.9 Hz, 2H, CH<sub>3</sub>CH<sub>2</sub>O), 3.98 (s, 1H, (CH<sub>3</sub>)<sub>2</sub>CHO), 3.78 (s, 3H, OCH<sub>3</sub>), 2.12 (m, 1H, (CH<sub>3</sub>)<sub>2</sub>CHCH), 1.42 (t, *J* = 6.8, 3H, CH<sub>3</sub>CH<sub>2</sub>O), 1.18 (dd, *J* = 9.3, 6.1 Hz, 6H, (CH<sub>3</sub>)<sub>2</sub>CHO), 0.91 (dd, *J* = 13.0, 5.1 Hz, 6H, (CH<sub>3</sub>)<sub>2</sub>CHCH). <sup>13</sup>C NMR (101 MHz, CDCl<sub>3</sub>) δ 171.02, 156.42, 149.04, 140.84, 133.50 (s), 131.52, 129.08, 128.52, 127.31, 121.17, 119.77, 111.00, 68.57, 63.71, 55.90, 53.41, 43.74, 31.06, 21.99, 19.38, 17.91. HRMS calcd for C<sub>25</sub>H<sub>33</sub>BrN<sub>2</sub>O<sub>5</sub> ([M + H]): 520.1636; Found: 520.1573.

**Isopropyl((2S)-1-(((3-ethoxy-4-methoxyphenyl)(p-tolyl)methyl)amino)-3-methyl-1-oxobutan-2-yl)carbamate 9u.** white solid, mp 174 - 175 °C. <sup>1</sup>H NMR (400 MHz, CDCl<sub>3</sub>) δ 7.11 (d, *J* = 8.6 Hz, 2H, Ph-H), 6.81 (d, *J* = 5.2 Hz, 2H, Ph-H), 6.75 – 6.60 (m, 3H, Ph-H), 6.09 (d, *J* = 6.3 Hz, 1H, Ph-CHNH), 5.17 (s, 1H, Ph-CH-Ph), 4.81 (s, 1H, COCHNH), 3.98 (s, 3H, OCH<sub>3</sub>), 3.80 (t, *J* = 7.8 Hz, 2H, CH<sub>3</sub>CH<sub>2</sub>O), 3.41 (d, *J* = 10.9 Hz, 1H, (CH<sub>3</sub>)<sub>2</sub>CHO), 2.80 (s, 3H, Ph-CH<sub>3</sub>), 2.09 (d, *J* = 32.9 Hz, 1H, (CH<sub>3</sub>)<sub>2</sub>CHCH), 1.50 – 1.30 (m, 3H, (CH<sub>3</sub>)<sub>2</sub>CHO), 1.18 (d, *J* = 2.9 Hz, 3H, (CH<sub>3</sub>)<sub>2</sub>CHO), 1.00 – 0.71 (m, 6H, (CH<sub>3</sub>)<sub>2</sub>CHCH). <sup>13</sup>C NMR (101 MHz, CDCl<sub>3</sub>) δ 170.80, 158.69, 156.32, 148.19, 134.27, 133.84, 128.54, 119.51, 119.39, 113.80, 112.27, 111.22, 63.67, 55.91, 55.22, 53.31, 43.68, 22.00, 19.37, 17.89, 14.73. HRMS calcd for C<sub>26</sub>H<sub>36</sub>N<sub>2</sub>O<sub>5</sub> ([M + K]): 456.2463; Found: 456.2624.

**Isopropyl((2S)-1-(((3-(benzyloxy)-4-methoxyphenyl)(p-tolyl)methyl)amino)-3-methyl-1-**

**oxobutan-2-yl)carbamate 9v.** white solid, mp 151 - 153 °C. <sup>1</sup>H NMR (400 MHz, CDCl<sub>3</sub>) δ 7.47 – 7.28 (m, 5H, Ph-H), 7.08 (d, *J* = 5.9 Hz, 2H, Ph-H), 7.05 – 6.99 (d, *J* = 8.2 Hz, 2H, Ph-H), 6.85 – 6.68 (m, 3H, Ph-H), 6.06 (d, *J* = 6.9 Hz, 1H, CHNHCO), 5.15 (s, 1H, Ph-CHNH), 4.85 (s, 1H, Ph-CH-Ph), 4.16 (s, 1H, COCHNH), 4.02 – 3.93 (s, 2H, Ph-CH<sub>2</sub>O), 3.84 (s, 3H, OCH<sub>3</sub>), 3.39 (s, 1H, (CH<sub>3</sub>)<sub>2</sub>CHO), 2.26 (s, 3H, Ph-CH<sub>3</sub>), 2.12 (m, 1H, (CH<sub>3</sub>)<sub>2</sub>CHCH), 1.31 – 1.03 (m, 6H, (CH<sub>3</sub>)<sub>2</sub>CHO), 0.96 – 0.83 (m, 6H, (CH<sub>3</sub>)<sub>2</sub>CHCH). <sup>13</sup>C NMR (101 MHz, CDCl<sub>3</sub>) δ 170.94, 156.40, 148.82, 147.94, 138.60, 136.92, 134.23, 129.18, 128.45, 127.80, 127.58, 127.16, 120.27, 120.04, 113.66, 111.63, 70.88, 63.71, 55.96, 53.26, 43.59, 31.11, 22.01, 19.38. HRMS calcd for C<sub>31</sub>H<sub>38</sub>N<sub>2</sub>O<sub>5</sub> ([M + H]): 518.2850; Found: 518.2780.

1. C. C. Silveira, E. L. Larghi, S. R. Mendes, A. B. Bracca, F. Rinaldi and T. S. Kaufman, *Eur J Org Chem*, 2009, **2009**, 4637-4645.
2. J. H. Poupaert, J. Adline, M. H. Claesen, P. De Laey and P. A. Dumont, *Journal of medicinal chemistry*, 1979, **22**, 1140-1142.
3. G. Lukacs, M. Porcs-Makkay and G. Simig, *Eur J Org Chem*, 2004, **2004**, 4130-4140.
4. D. P. Kennedy, C. Gwizdala and S. C. Burdette, *Org Lett*, 2009, **11**, 2587-2590.
5. F. Belluti, L. Piazzzi, A. Bisi, S. Gobbi, M. Bartolini, A. Cavalli, P. Valenti and A. Rampa, *European Journal of Medicinal Chemistry*, 2009, **44**, 1341-1348.
6. M. Jereb and D. Vražič, *Organic & biomolecular chemistry*, 2013, **11**, 1978-1999.
7. K. Bernauer, J. Borgulya, H. Bruderer, M. DaPrada and G. Zurcher, US, 1993.
8. S. Goenechea, H. Brzezinka, G. Glanzmann, G. Rücker and M. Neugebauer, *Archiv der Pharmazie*, 1989, **322**, 355-357.
9. G. Manikumar, C. Jin and K. S. Rehder, *Synthetic Communications*, 2008, **38**, 810-815.
10. N. O. Isoo Ito, Katsuhiko takeda, Takahiro Wakayama, *Chemical & pharmaceutical bulletin*, 1969, **17**, 1524-1526.
11. B. Bhatkhande, *Journal of the University of Bombay, Science: Physical Sciences, Mathematics, Biological Sciences and Medicine*, 1956, **24**, 11-14.

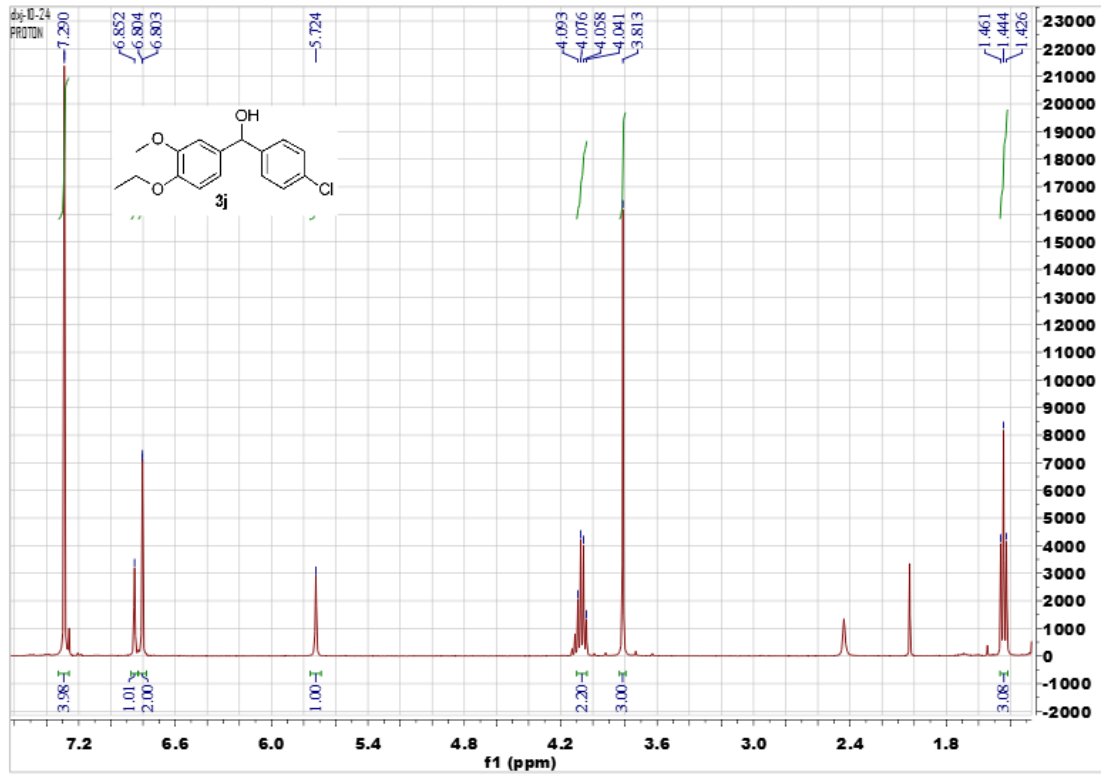

3i

| Sample Name   | lc/ms | Position    | P1-A3     | Instrument Name | Instrument 1 | User Name              | IRM Calibration Status | Some Ions Missed     |
|---------------|-------|-------------|-----------|-----------------|--------------|------------------------|------------------------|----------------------|
| Inj Vol       | 1     | InjPosition |           | SampleType      | Sample       | IRM Calibration Status |                        | 2/28/2014 9:17:37 AM |
| Data Filename | 31.d  | ACQ Method  | chen-ms.m | Comment         |              | Acquired Time          |                        |                      |

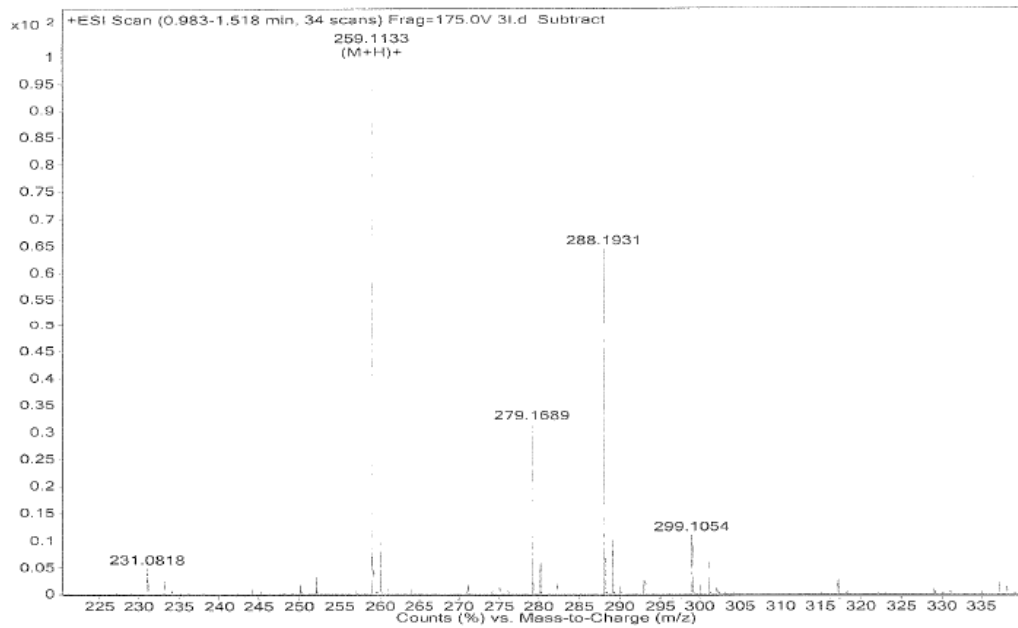

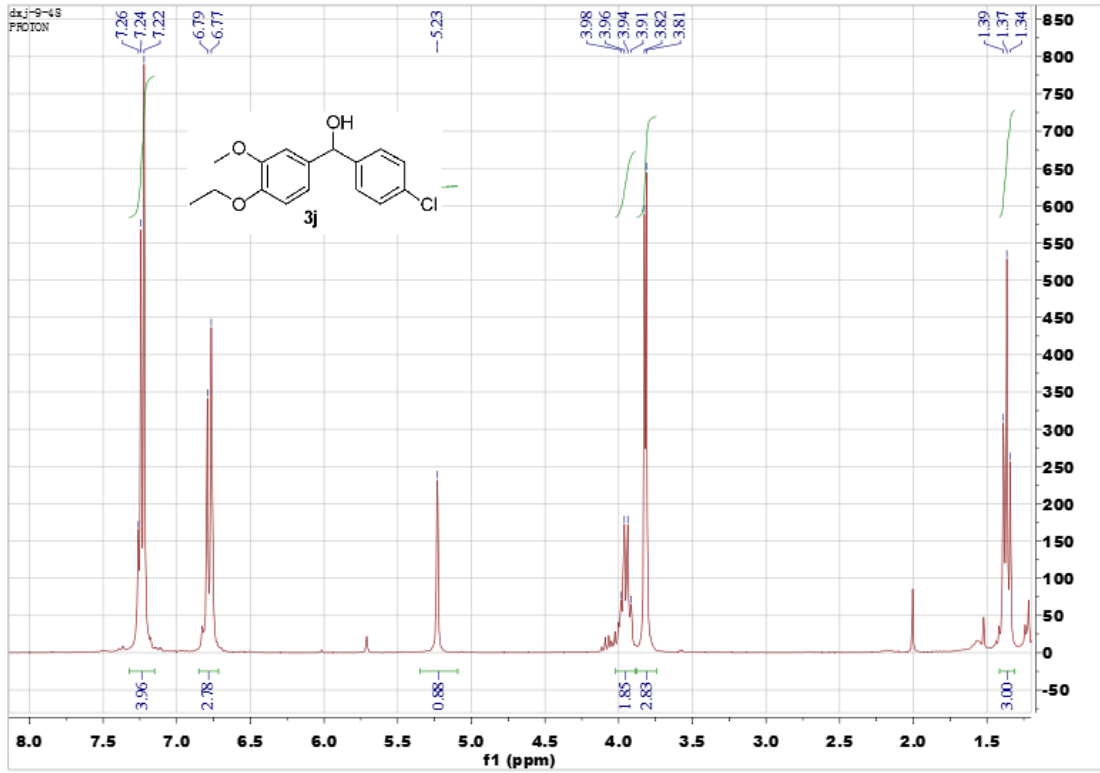

3j

|               |       |             |          |                 |              |                        |                      |
|---------------|-------|-------------|----------|-----------------|--------------|------------------------|----------------------|
| Sample Name   | lg/ms | Position    | P1-A4    | Instrument Name | Instrument 1 | User Name              |                      |
| Inj Vol       | 1     | InjPosition |          | SampleType      | Sample       | IRM Calibration Status | Some Ions Missed     |
| Data Filename | 3j.d  | ACQ Method  | den-ms.m | Comment         |              | Acquired Time          | 2/28/2014 9:21:20 AM |

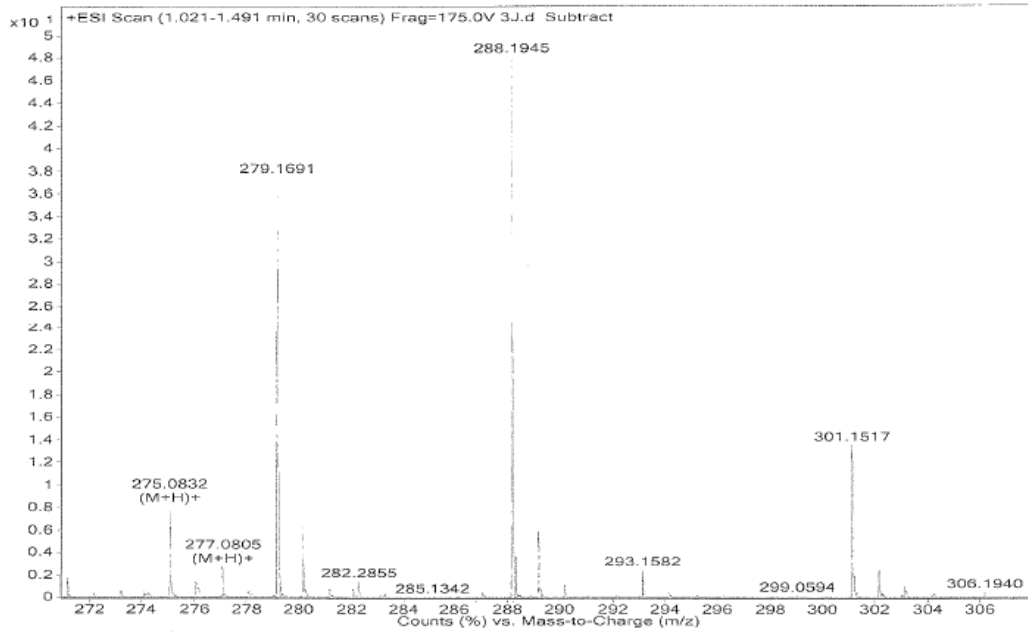

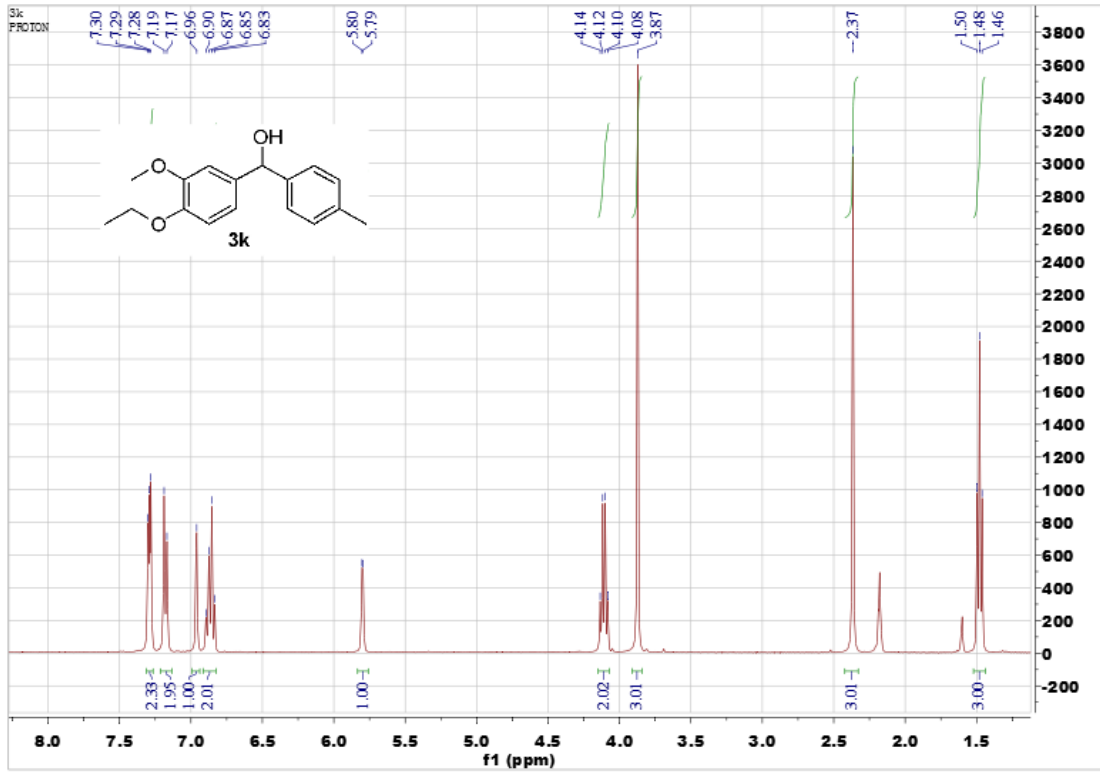

| Sample Name   | Ic/ms | Position    | PI-A5     | Instrument Name | Instrument 1 | User Name              |
|---------------|-------|-------------|-----------|-----------------|--------------|------------------------|
| Inj Vol       | 1     | InjPosition |           | SampleType      | Sample       | IRM Calibration Status |
| Data Filename | 3K.d  | ACQ Method  | chen-ms.m | Comment         |              | Acquired Time          |

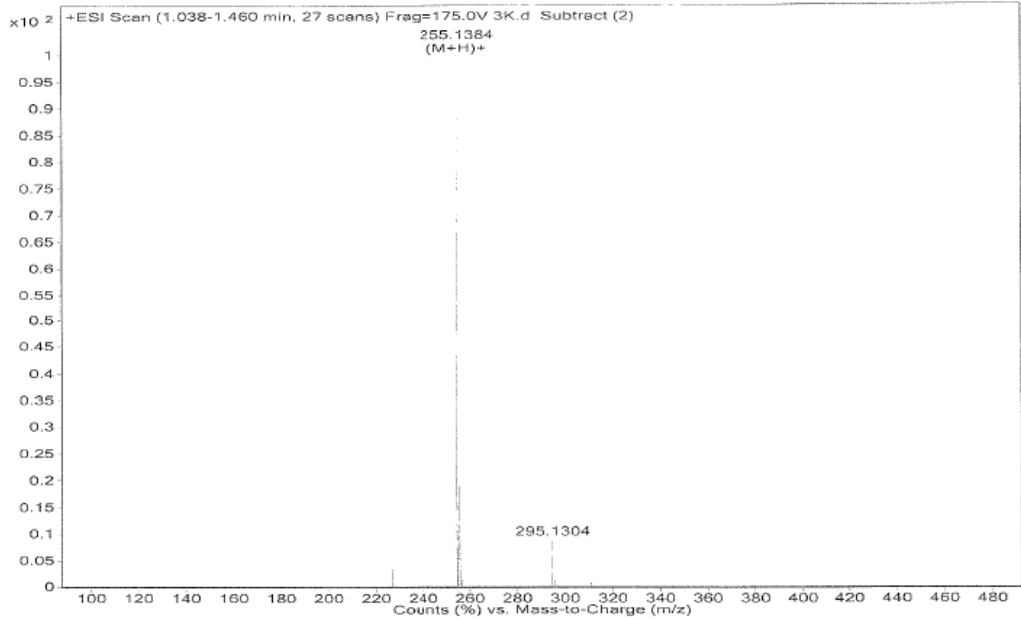

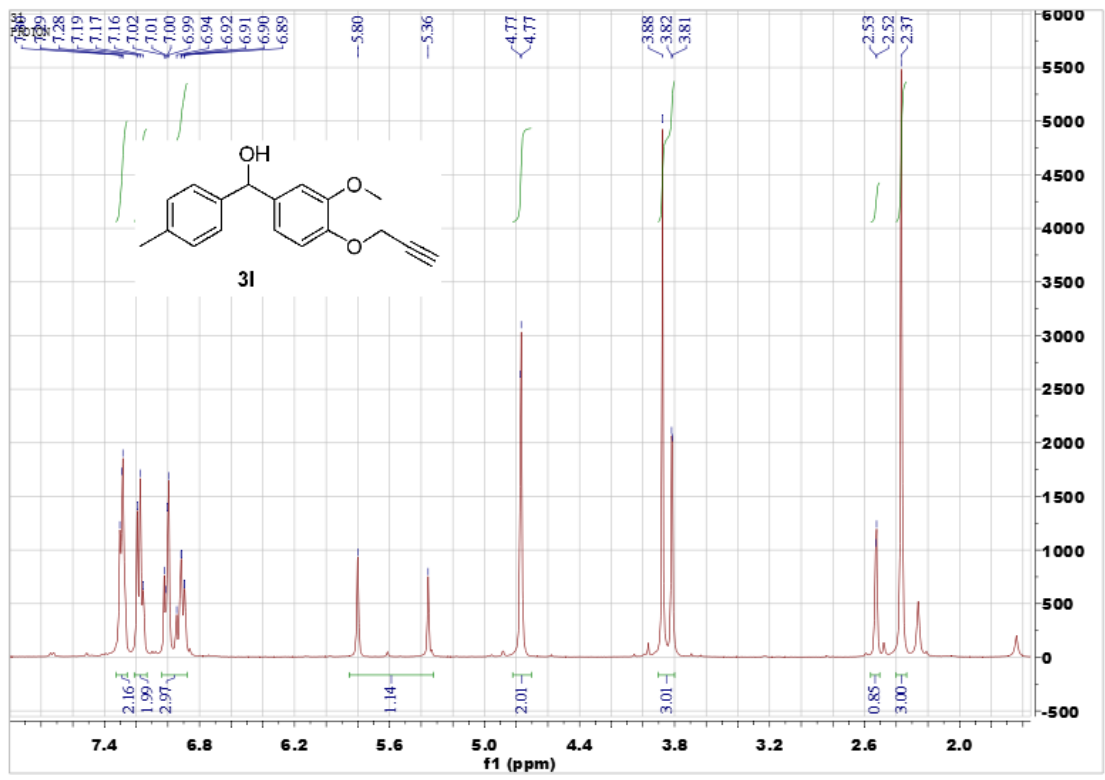

31

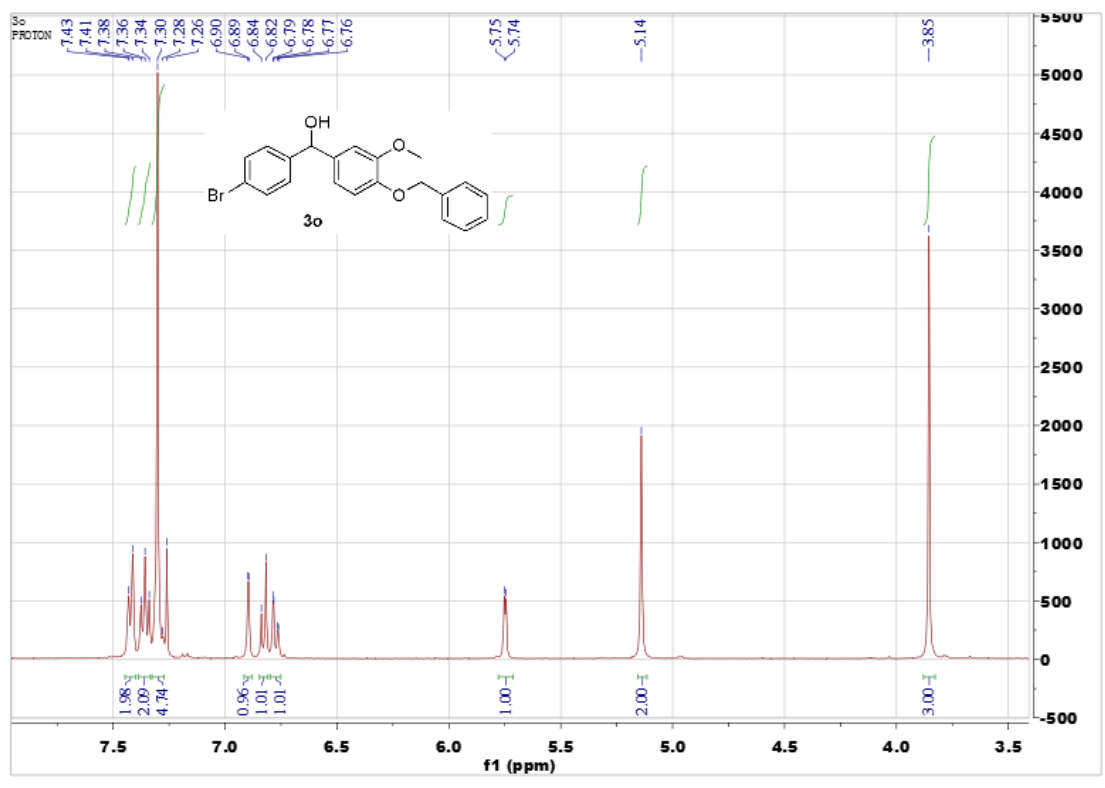



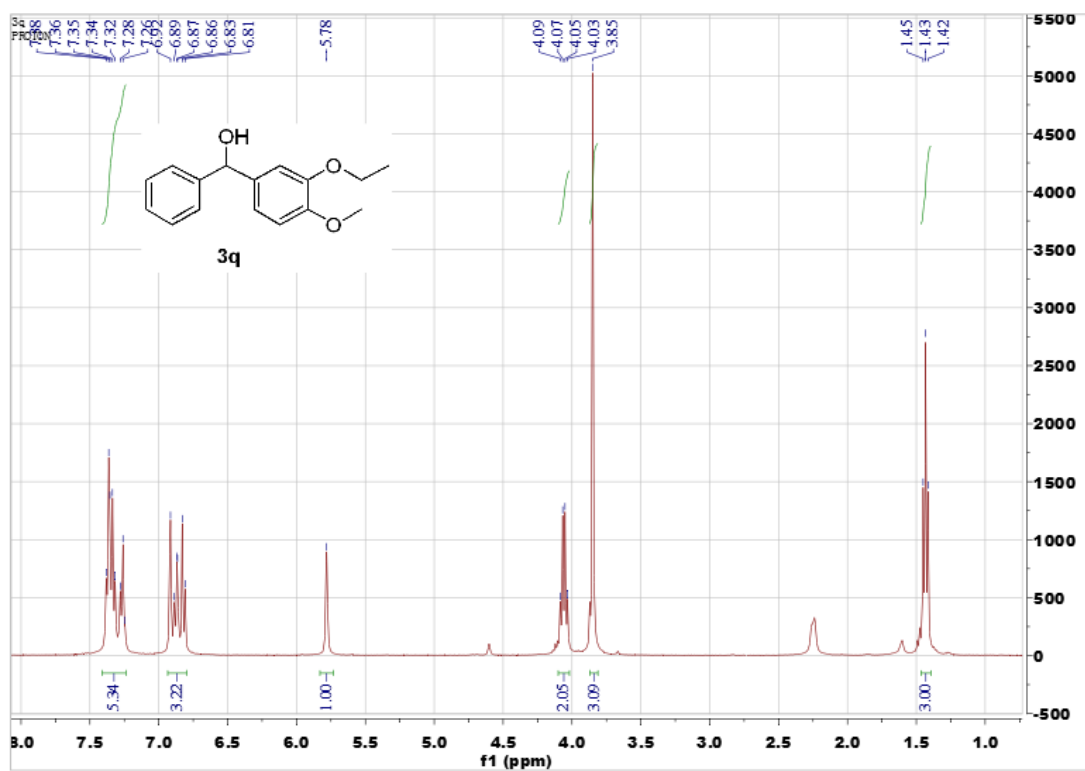

3q

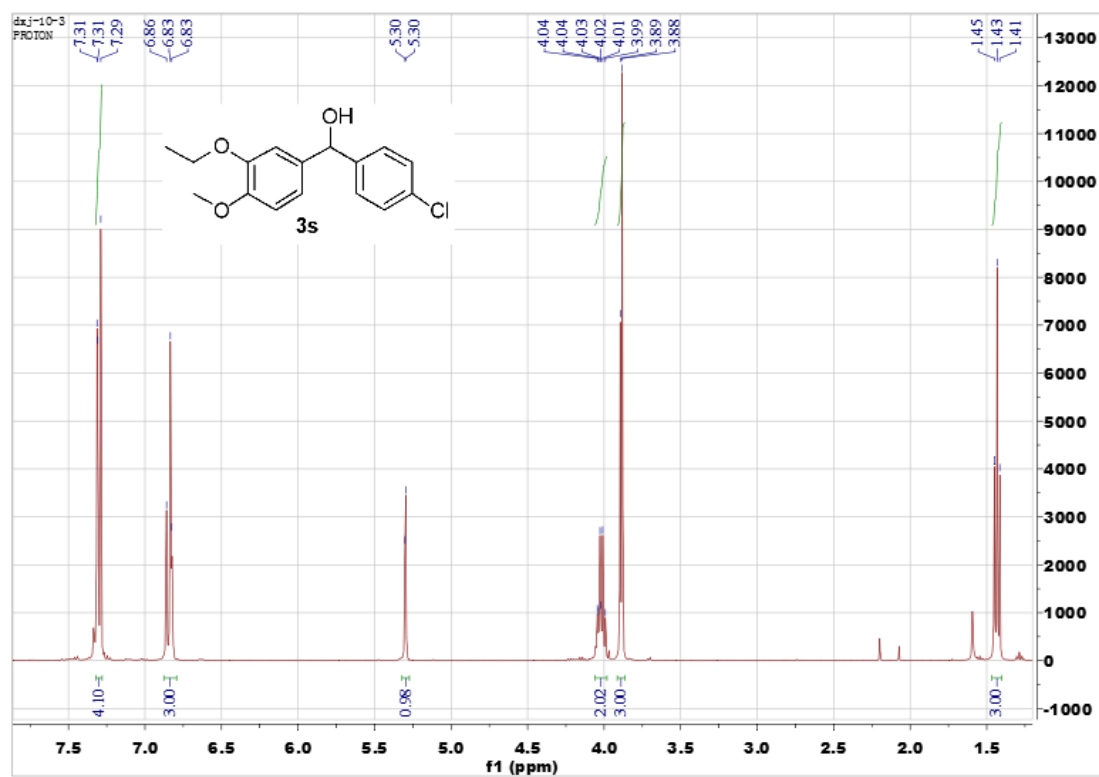

3s

|               |       |             |           |                 |              |                        |                       |
|---------------|-------|-------------|-----------|-----------------|--------------|------------------------|-----------------------|
| Sample Name   | lc/ms | Position    | P1-A1     | Instrument Name | Instrument 1 | User Name              |                       |
| Inj Vol       | 1     | InjPosition |           | SampleType      | Sample       | IRM Calibration Status | Some Ions Missed      |
| Data Filename | 35.d  | ACQ Method  | chem-ms.m | Comment         |              | Acquired Time          | 2/28/2014 10:11:18 AM |

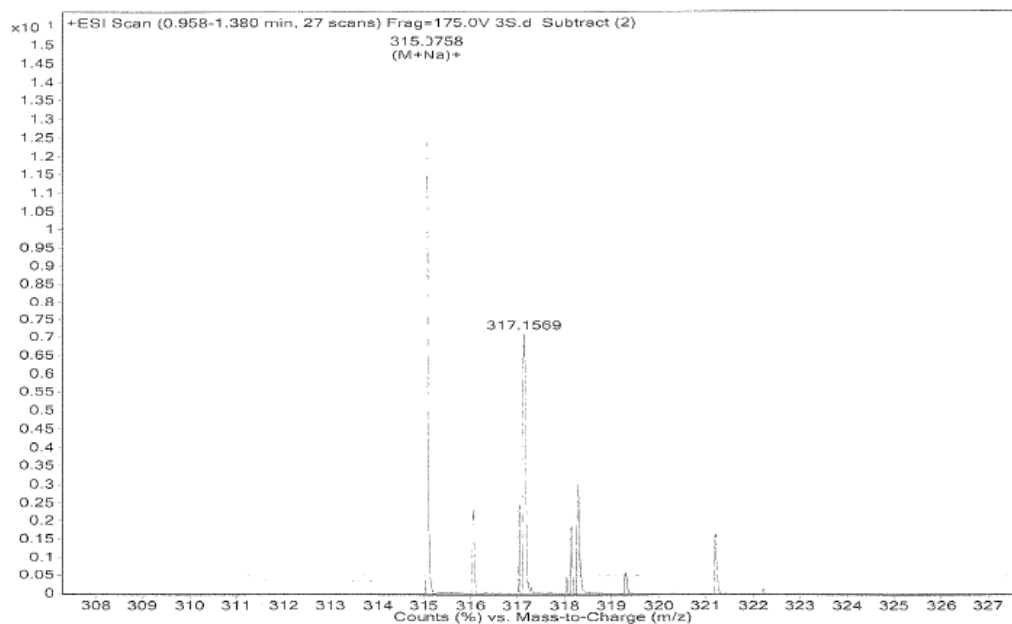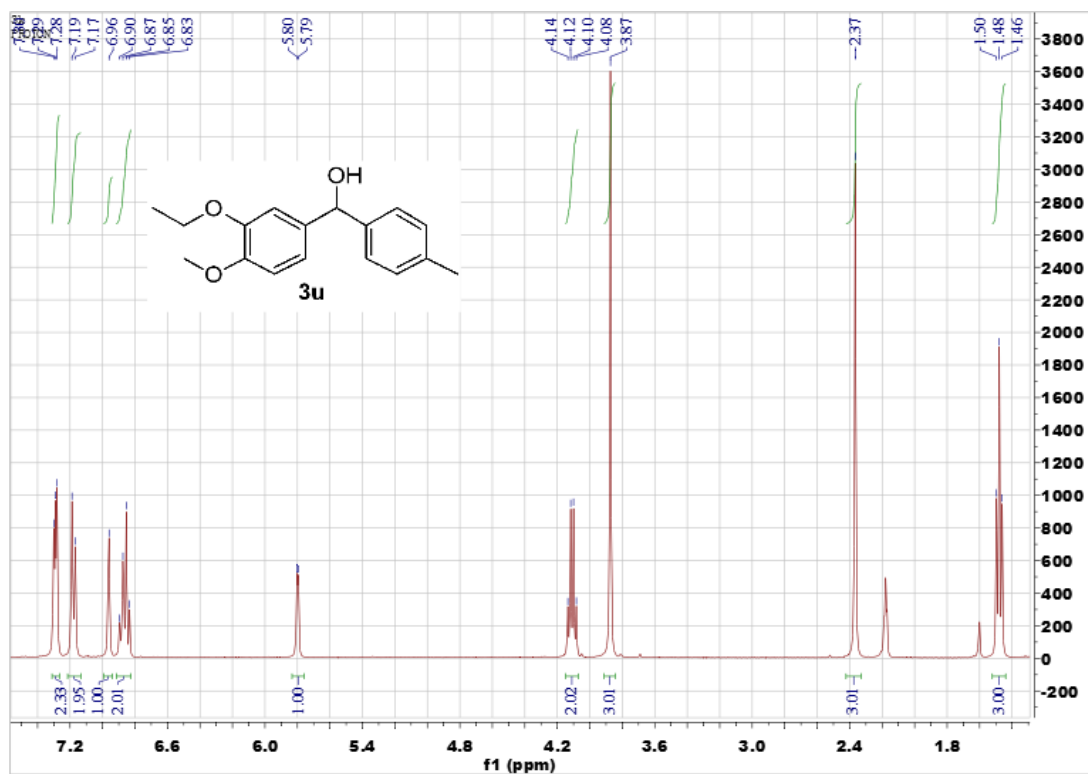

3u

| Sample Name   | lc/ms | Position    | PI-A6     | Instrument Name | Instrument 1 | User Name              |                      |
|---------------|-------|-------------|-----------|-----------------|--------------|------------------------|----------------------|
| Inj Vol       | 1     | InjPosition |           | SampleType      | Sample       | IRM Calibration Status | Some Ions Missed     |
| Data Filename | 3U.d  | ACQ Method  | chem-ms.m | Comment         |              | Acquired Time          | 2/26/2014 9:28:47 AM |

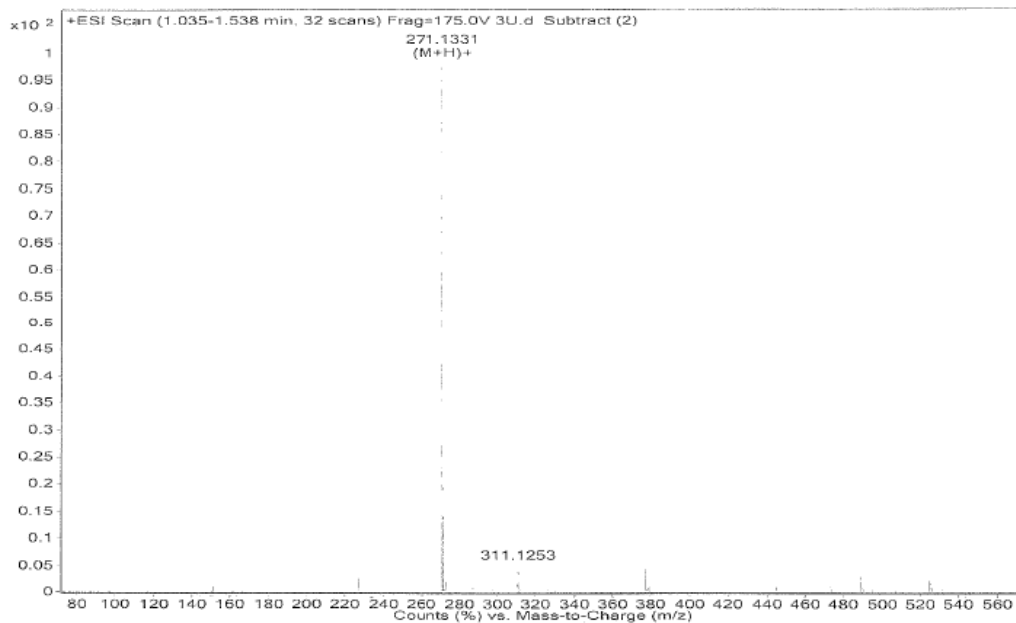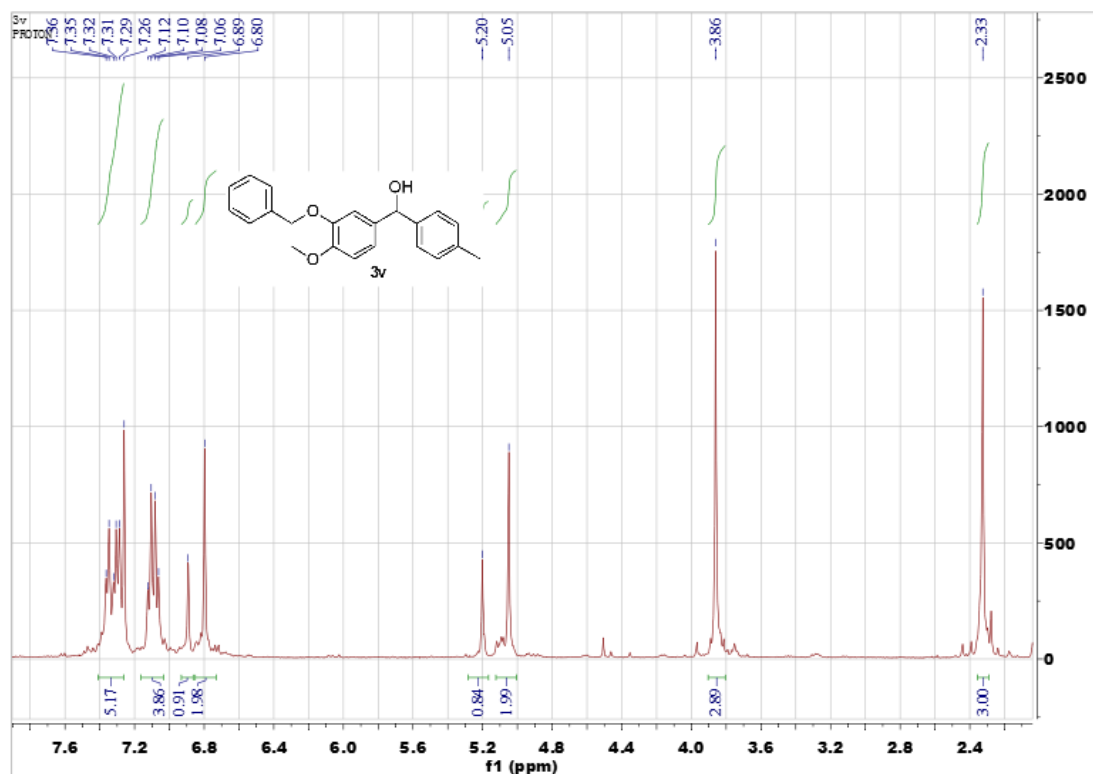

3v

|               |       |             |           |                 |              |                        |                      |
|---------------|-------|-------------|-----------|-----------------|--------------|------------------------|----------------------|
| Sample Name   | lc/ms | Position    | P1-A7     | Instrument Name | Instrument 1 | User Name              |                      |
| Inj Vol       | 1     | InjPosition |           | SampleType      | Sample       | IRM Calibration Status | Some Ions Missed     |
| Data Filename | 3V.d  | ACQ Method  | chem-ms.m | Comment         |              | Acquired Time          | 2/28/2014 9:32:28 AM |

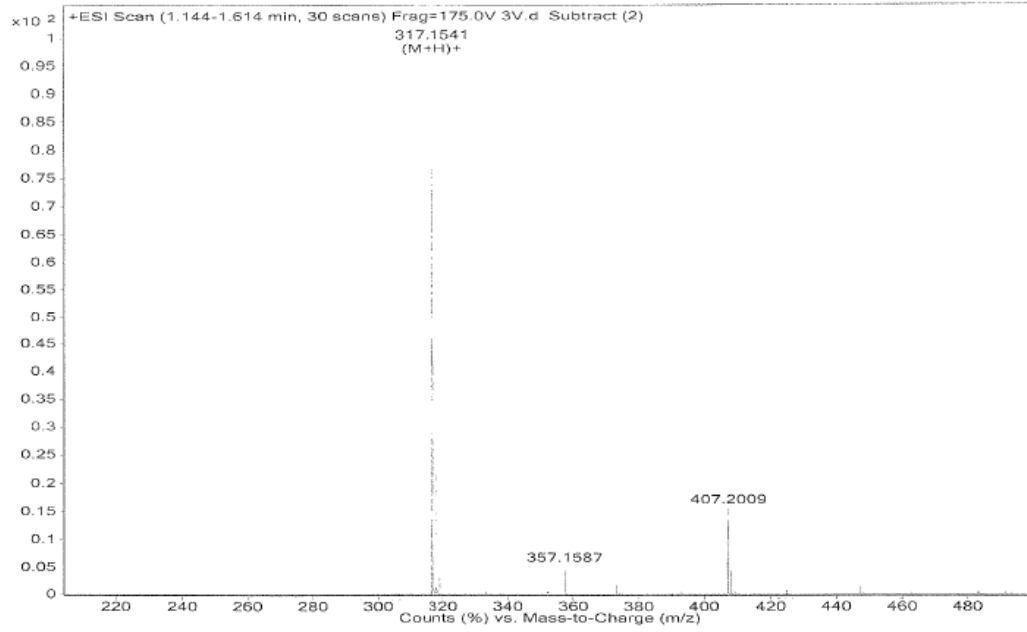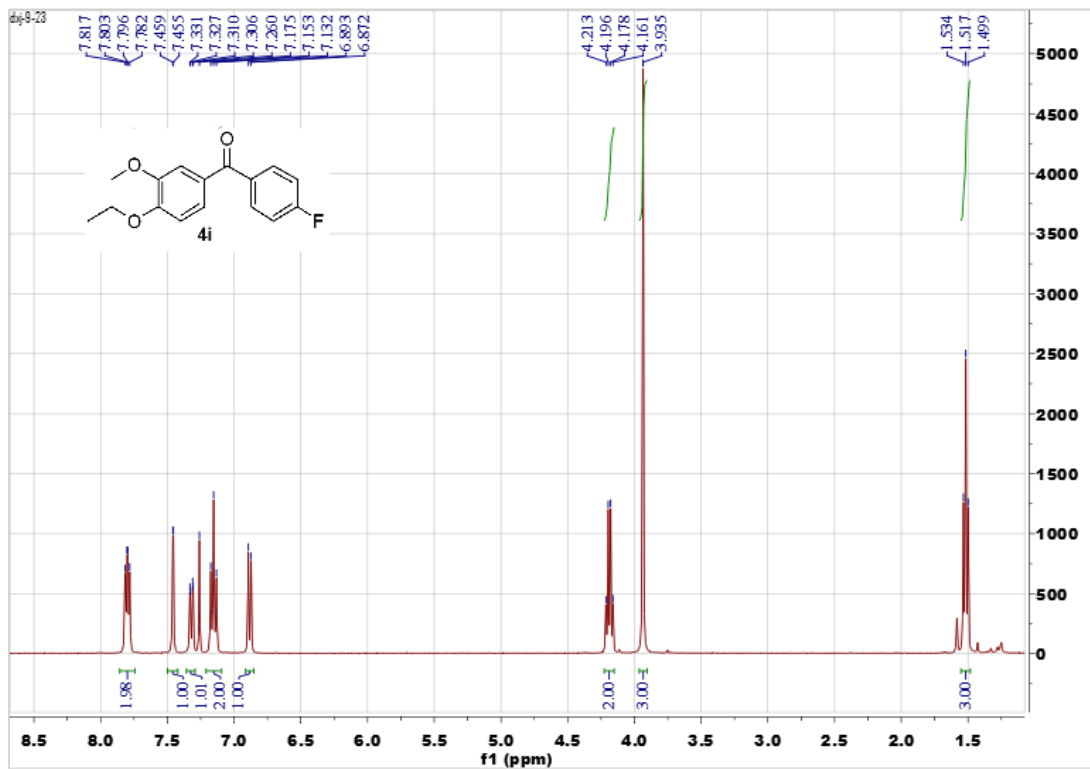

4i

|               |       |             |           |                 |              |                        |                       |
|---------------|-------|-------------|-----------|-----------------|--------------|------------------------|-----------------------|
| Sample Name   | 4j.ms | Position    | P1-A2     | Instrument Name | Instrument 1 | User Name              |                       |
| Inj Vol       | 1     | InjPosition |           | SampleType      | Sample       | IRM Calibration Status | Some Ions Missed      |
| Data Filename | 41.d  | ACQ Method  | chem-ms.m | Comment         |              | Acquired Time          | 2/28/2014 10:15:01 AM |

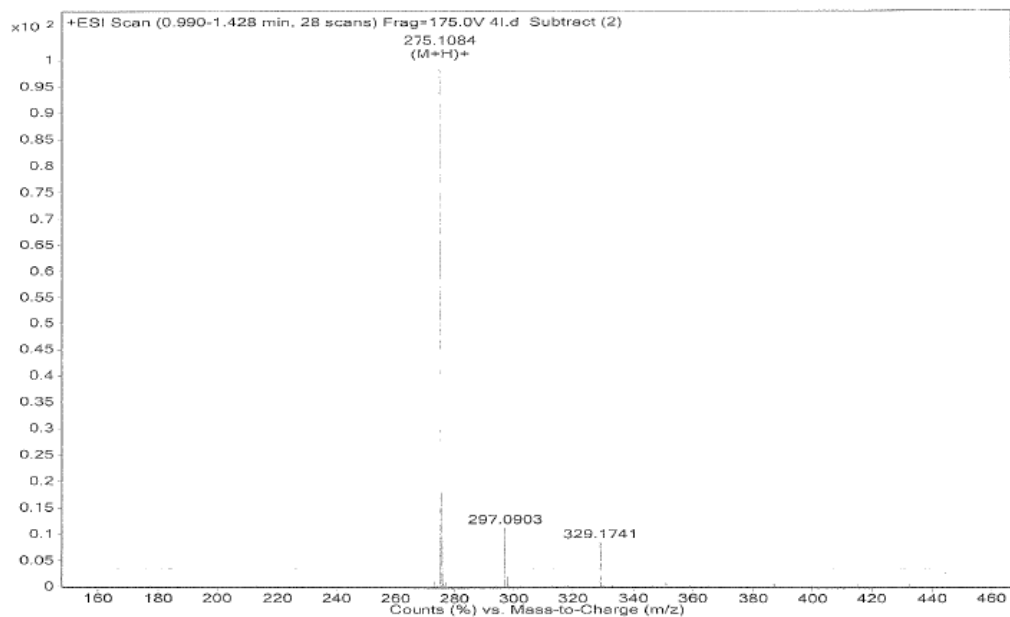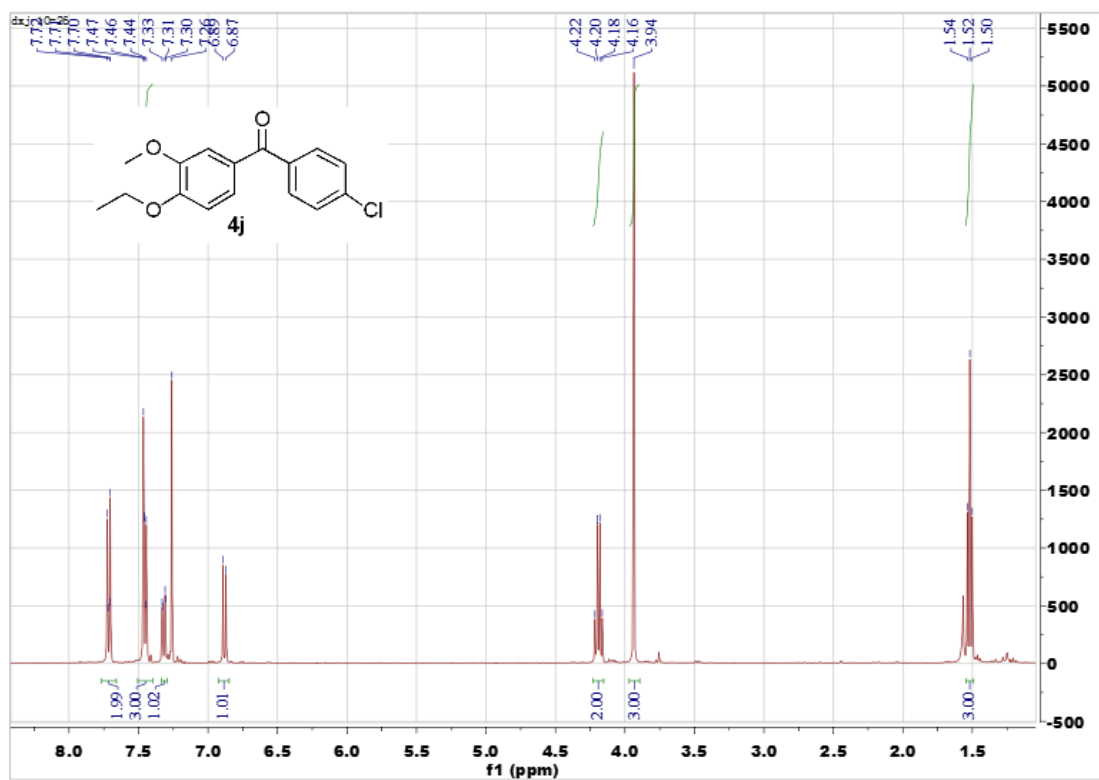

4j

| Sample Name   | Ic/ms | Position    | PL-A3     | Instrument Name | Instrument 1 | User Name              |                       |
|---------------|-------|-------------|-----------|-----------------|--------------|------------------------|-----------------------|
| Inj Vol       | 1     | InjPosition |           | SampleType      | Sample       | IRM Calibration Status | Some Ions Missed      |
| Data Filename | 4J.d  | ACQ Method  | chem-ms.m | Comment         |              | Acquired Time          | 2/28/2014 10:18:44 AM |

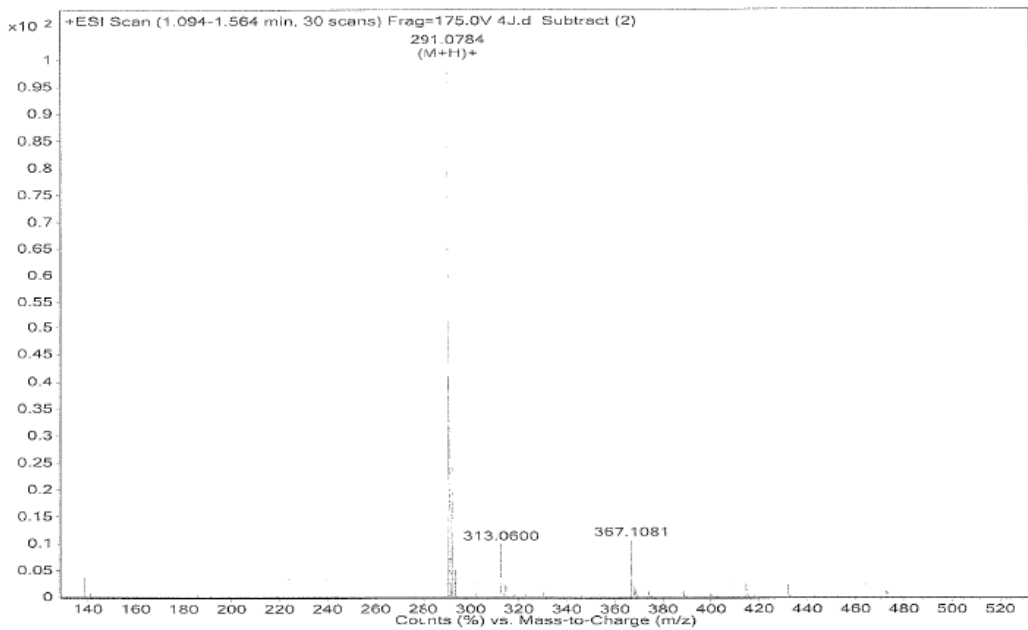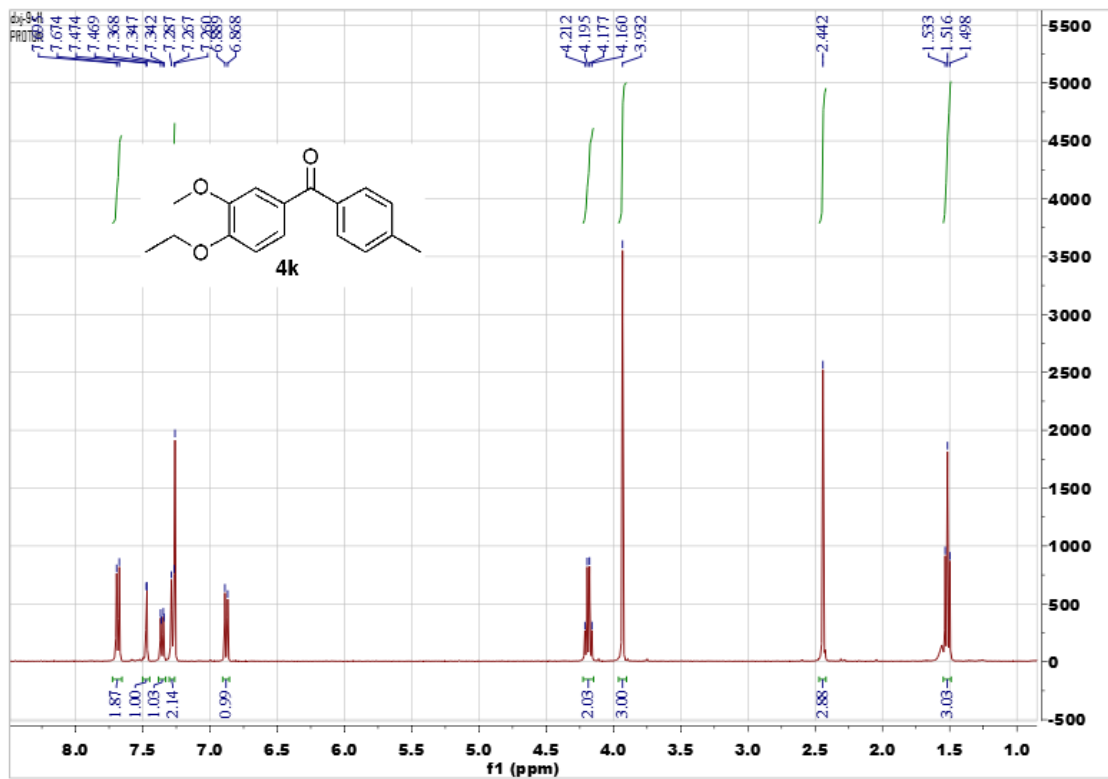

4k

|               |       |             |           |                 |              |                        |                       |
|---------------|-------|-------------|-----------|-----------------|--------------|------------------------|-----------------------|
| Sample Name   | lc/ms | Position    | P1-A4     | Instrument Name | Instrument 1 | User Name              |                       |
| Inj Vol       | 1     | InjPosition |           | SampleType      | Sample       | IRM Calibration Status | Some Ions Missed      |
| Data Filename | 4K.d  | ACQ Method  | chem.ms.m | Comment         |              | Acquired Time          | 2/28/2014 10:22:27 AM |

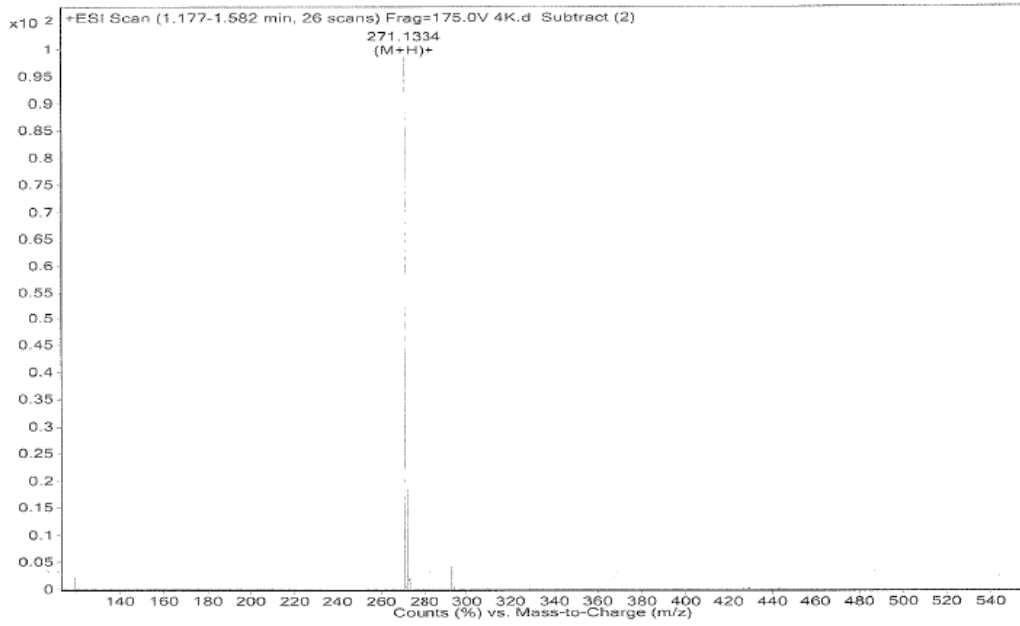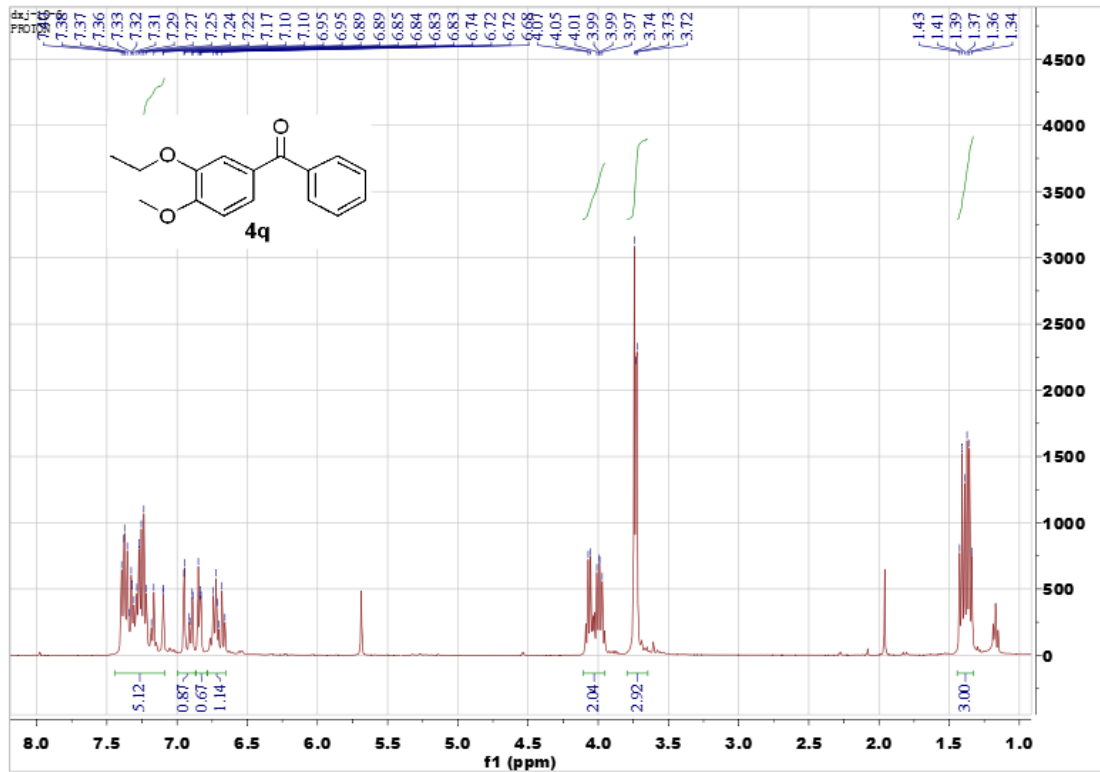

4q

| Sample Name   | ic/ms | Position    | P1-A5     | Instrument Name | Instrument 1 | User Name              |                       |
|---------------|-------|-------------|-----------|-----------------|--------------|------------------------|-----------------------|
| Inj Vol       | 1     | InjPosition |           | SampleType      | Sample       | IRM Calibration Status | Some Ions Missed      |
| Data Filename | 4Q.d  | ACQ Method  | chem-ms.m | Comment         |              | Acquired Time          | 2/28/2014 10:26:10 AM |

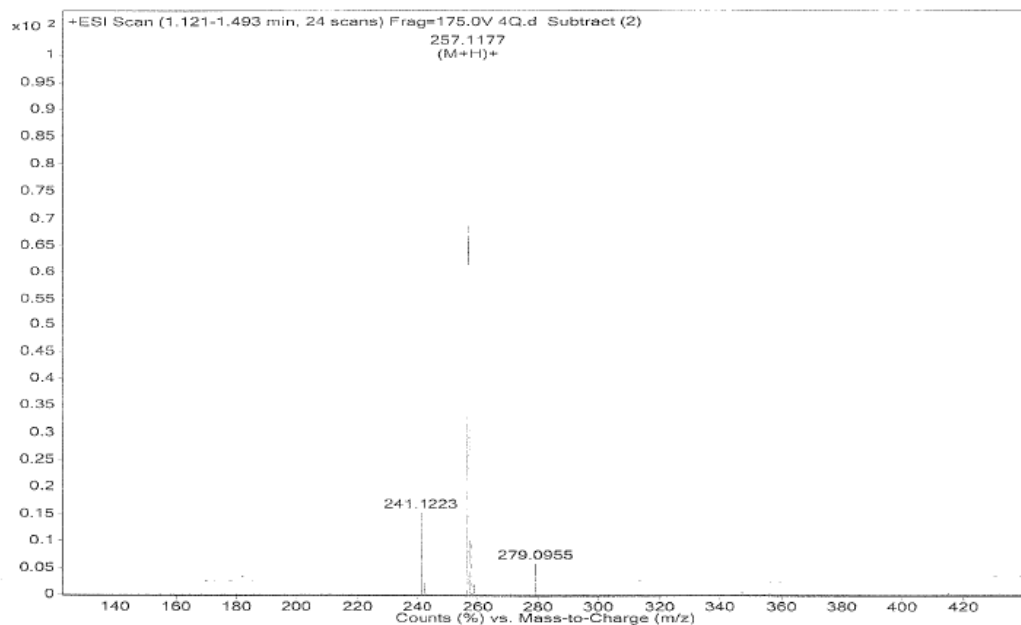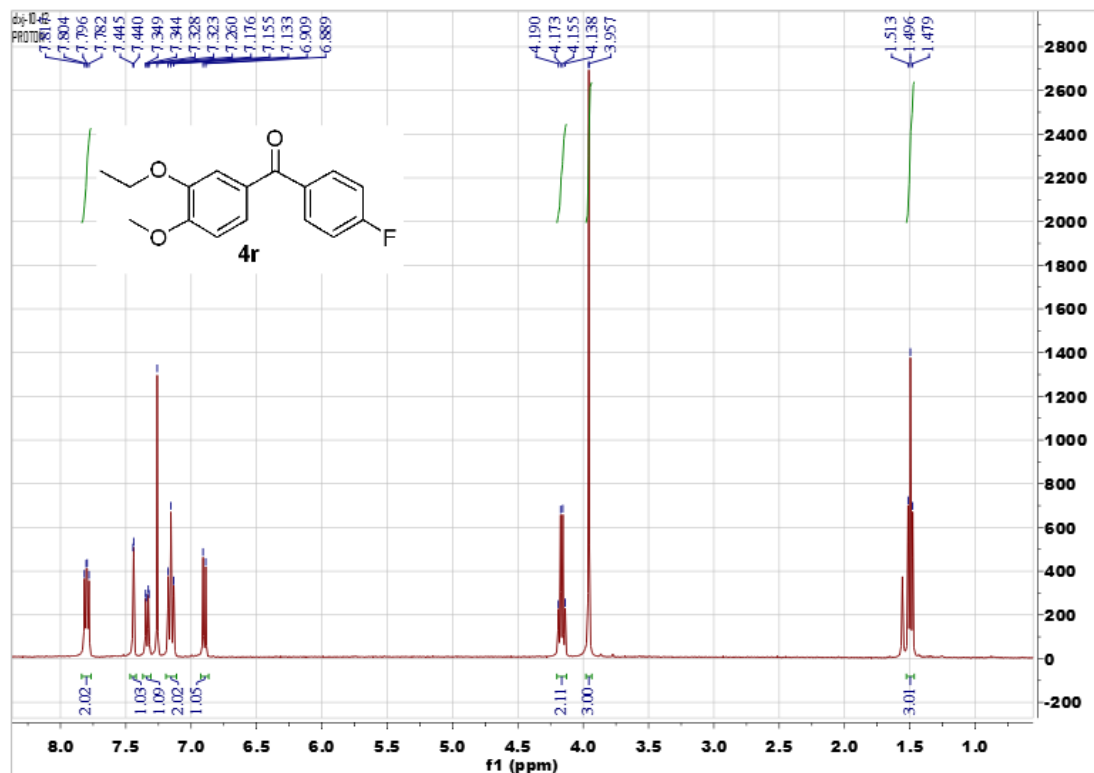

4r



| Sample Name   | k/ms | Position    | P1-A6     | Instrument Name | Instrument 1 | User Name              |                       |
|---------------|------|-------------|-----------|-----------------|--------------|------------------------|-----------------------|
| Inj Vol       | 1    | InjPosition |           | SampleType      | Sample       | IRM Calibration Status | Some Ions Missed      |
| Data Filename | 4R.d | ACQ Method  | chen-ms.m | Comment         |              | Acquired Time          | 2/28/2014 10:23:54 AM |

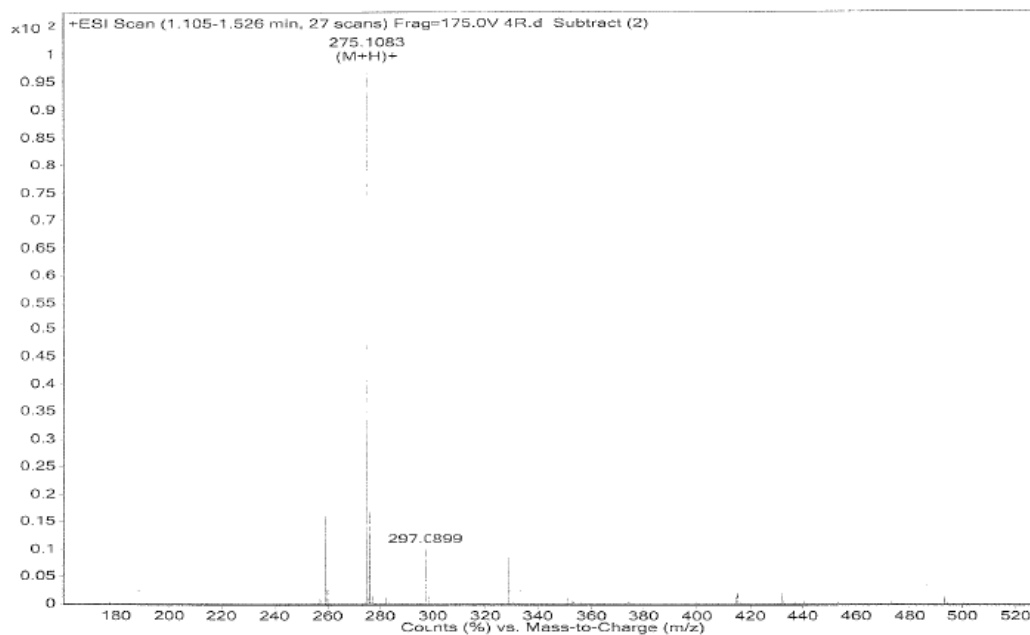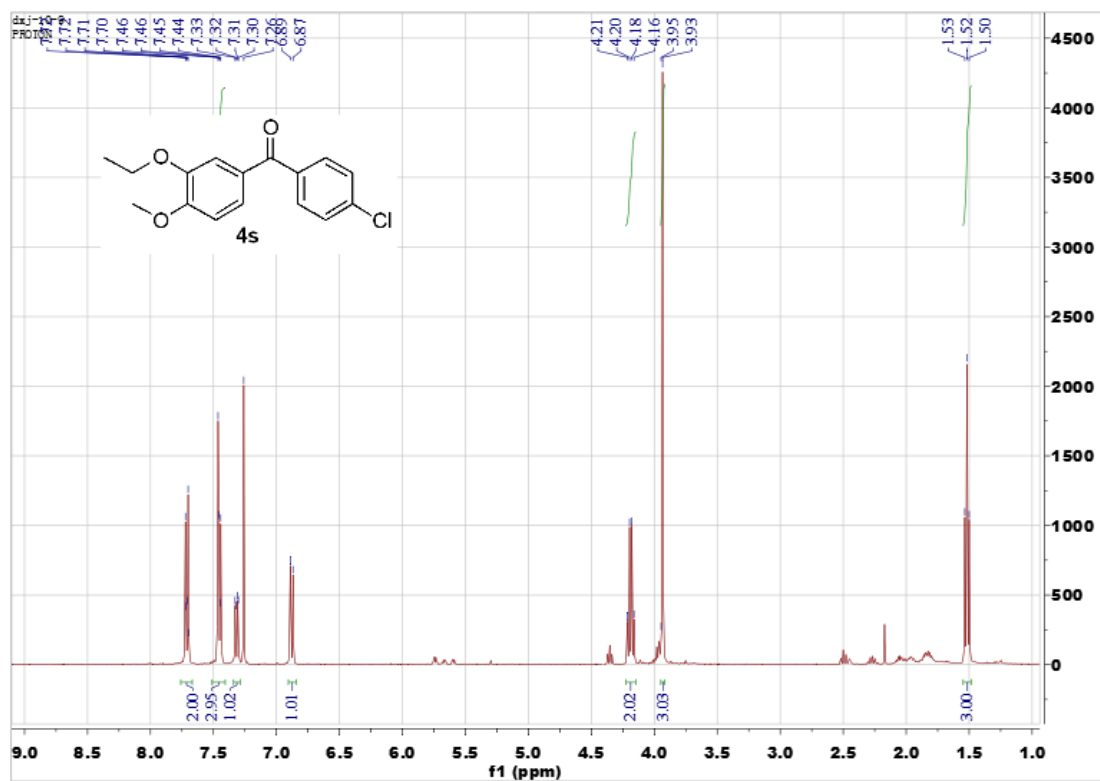

4s

| Sample Name   | lc/ms | Position    | PI-A7     | Instrument Name | Instrument 1 | User Name              |                       |
|---------------|-------|-------------|-----------|-----------------|--------------|------------------------|-----------------------|
| Inj Vol       | 1     | InjPosition |           | SampleType      | Sample       | IRM Calibration Status | Some Ions Missed      |
| Data Filename | 4S.d  | ACQ Method  | chen-ms.m | Comment         |              | Acquired Time          | 2/26/2014 10:33:36 AM |

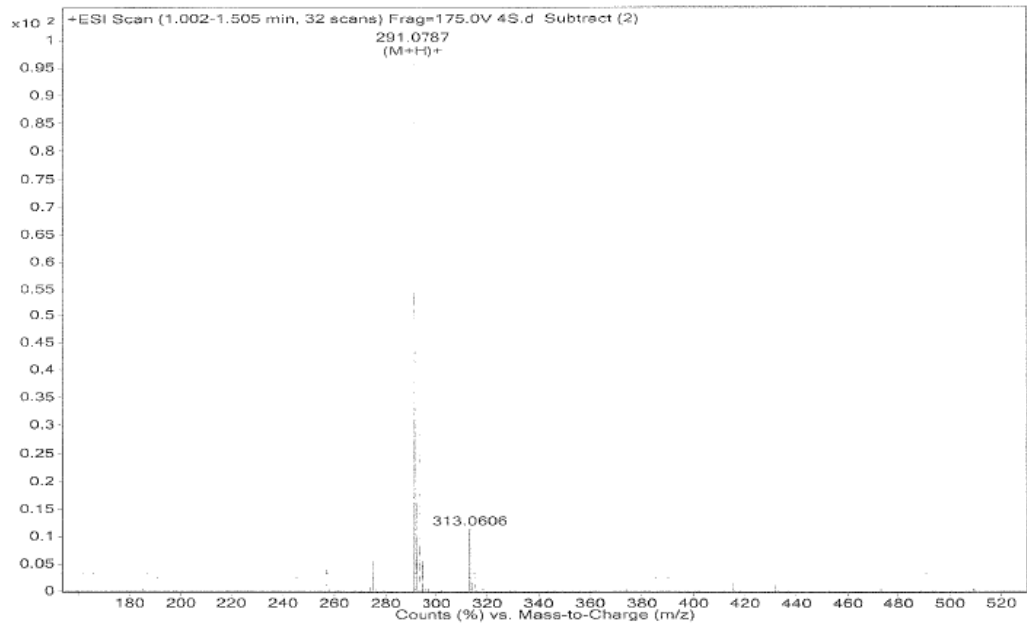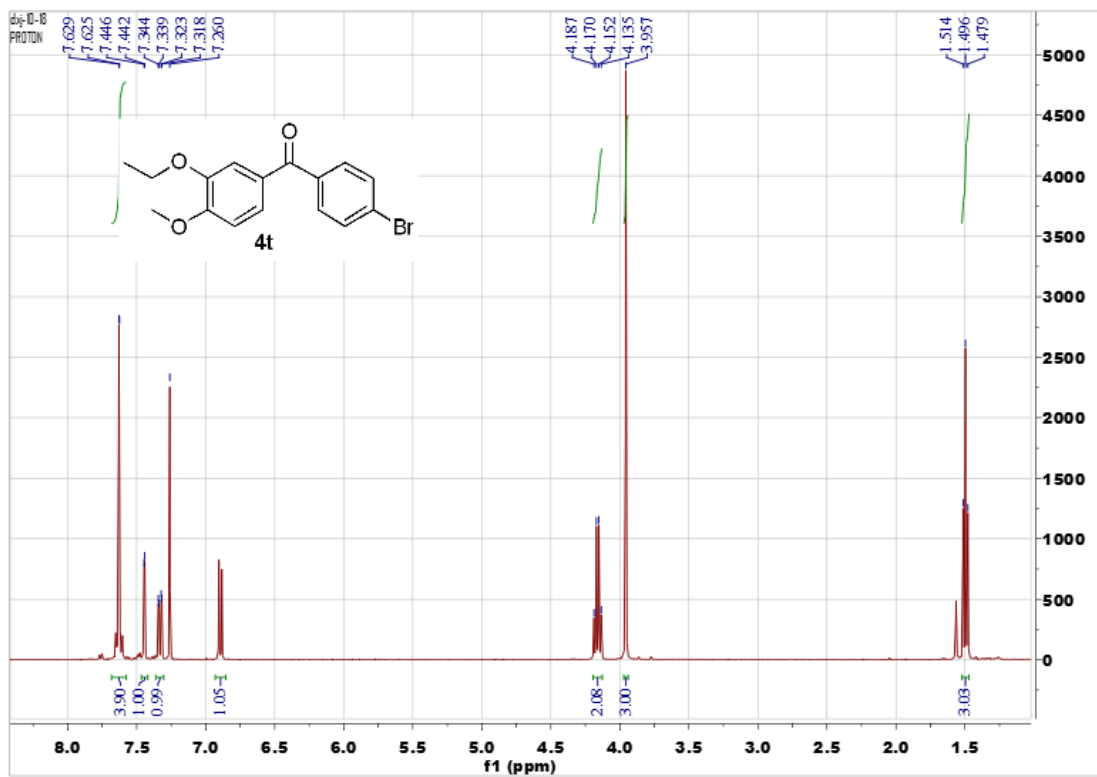

4t

| Sample Name   | ic/ms | Position    | PI-A1     | Instrument Name | Instrument 1 | User Name              |                       |
|---------------|-------|-------------|-----------|-----------------|--------------|------------------------|-----------------------|
| Inj Vol       | 1     | InjPosition |           | SampleType      | Sample       | IRM Calibration Status | Some Ions Missed      |
| Data Filename | 4T.d  | ACQ Method  | chen-ms.m | Comment         |              | Acquired Time          | 2/28/2014 11:07:06 AM |

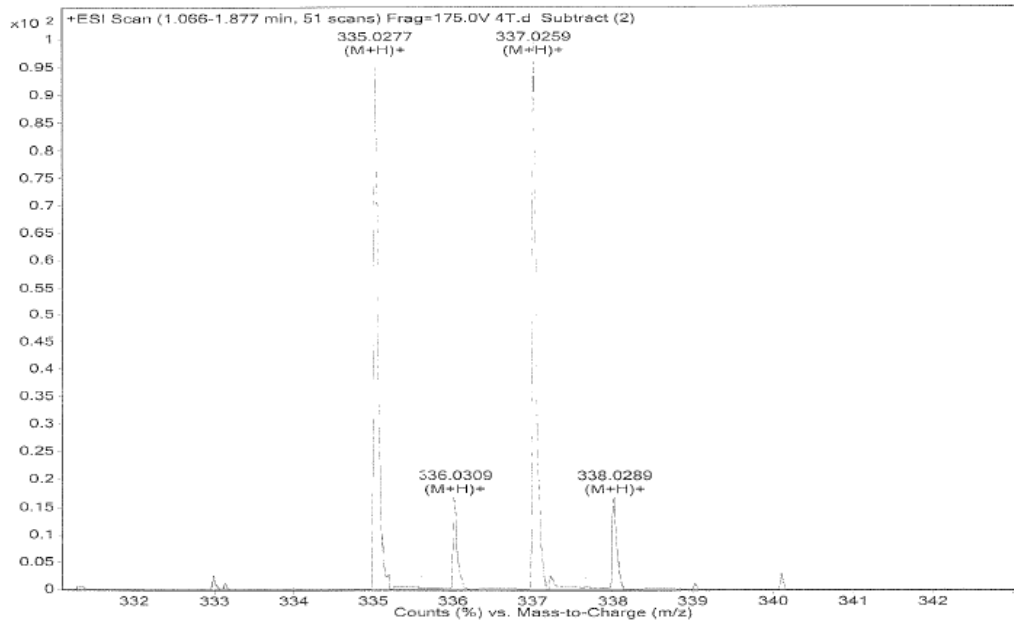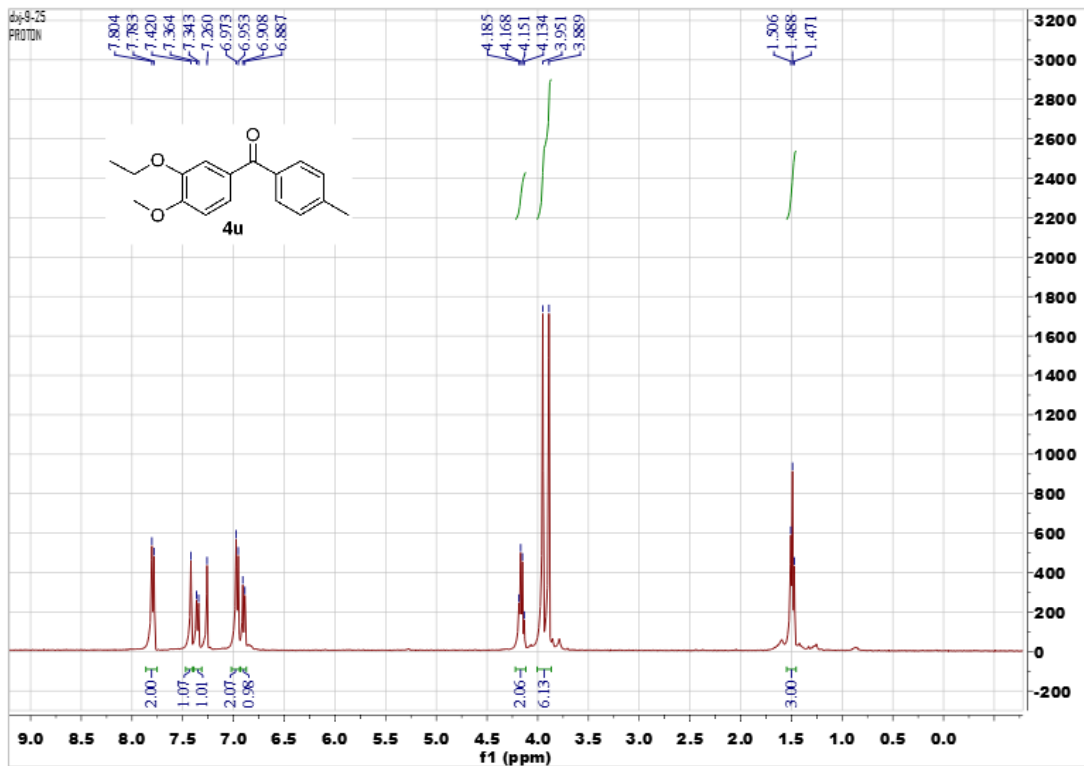

4u

|               |       |             |           |                 |              |                        |                      |
|---------------|-------|-------------|-----------|-----------------|--------------|------------------------|----------------------|
| Sample Name   | lc/ms | Position    | P1-A2     | Instrument Name | Instrument 1 | User Name              |                      |
| Inj Vol       | 1     | InjPosition |           | SampleType      | Sample       | IRM Calibration Status | Some Ions Missed     |
| Data Filename | 4U.d  | ACQ Method  | chem-ms.m | Comment         |              | Acquired Time          | 2/28/2014 3:25:18 PM |

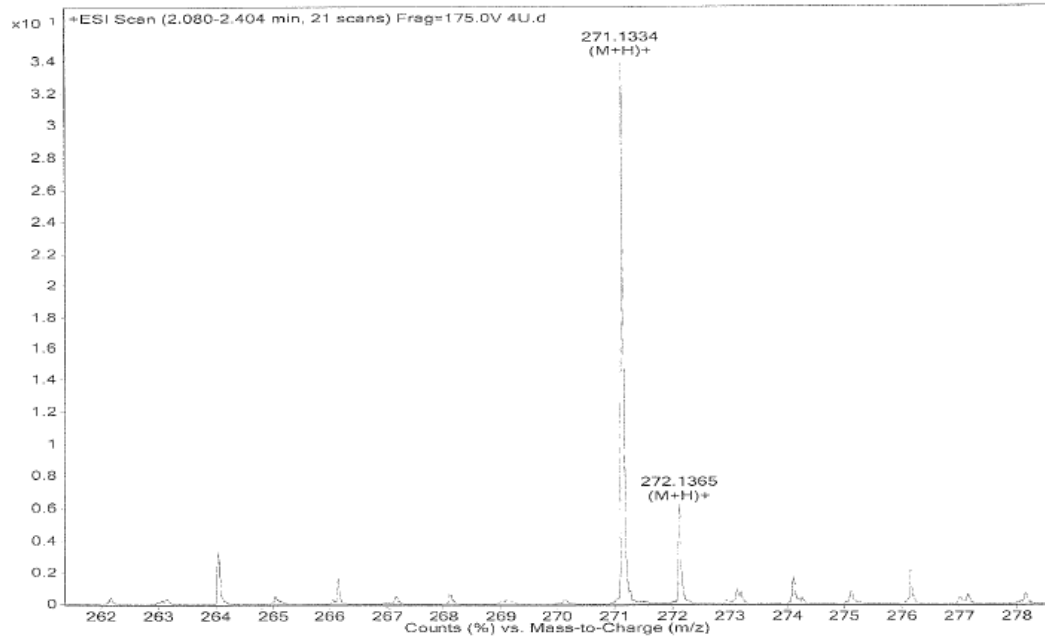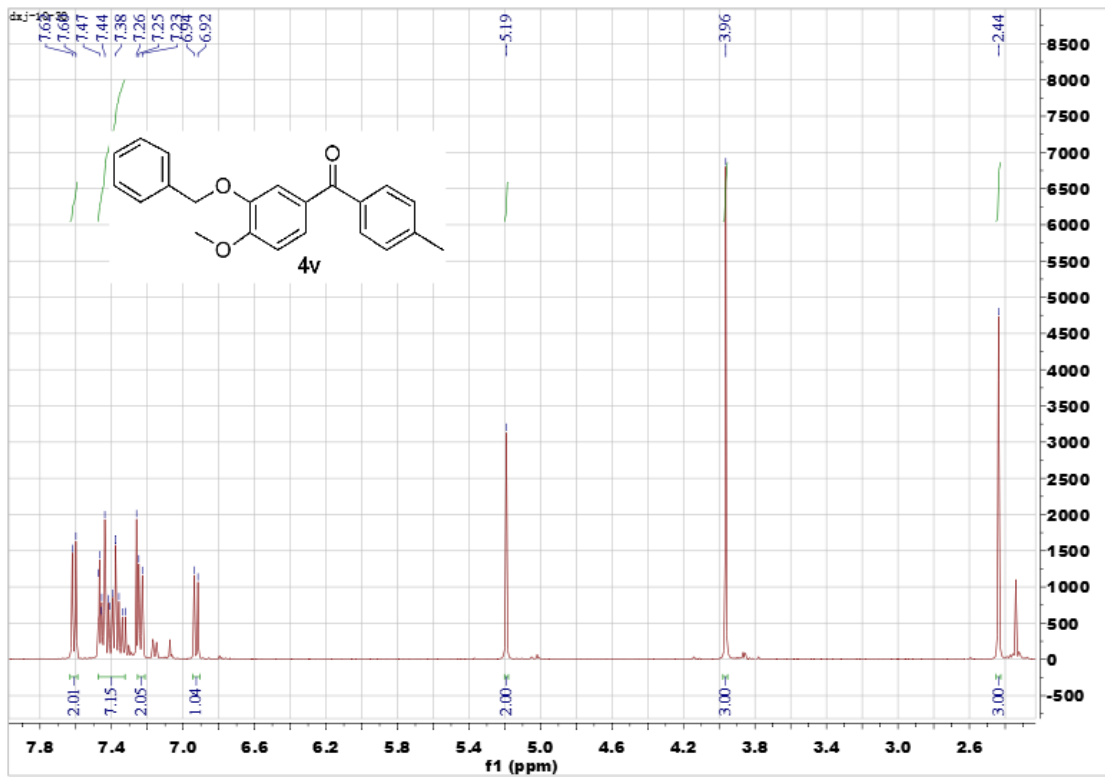

4v

|               |       |             |           |                 |              |                        |                      |
|---------------|-------|-------------|-----------|-----------------|--------------|------------------------|----------------------|
| Sample Name   | ic/ms | Position    | PI-A3     | Instrument Name | Instrument 1 | User Name              |                      |
| Inj Vol       | 1     | InjPosition |           | SampleType      | Sample       | IRM Calibration Status | Some Ions Missed     |
| Data Filename | 4v.d  | ACQ Method  | chen-ms.m | Comment         |              | Acquired Time          | 2/28/2014 3:29:00 PM |

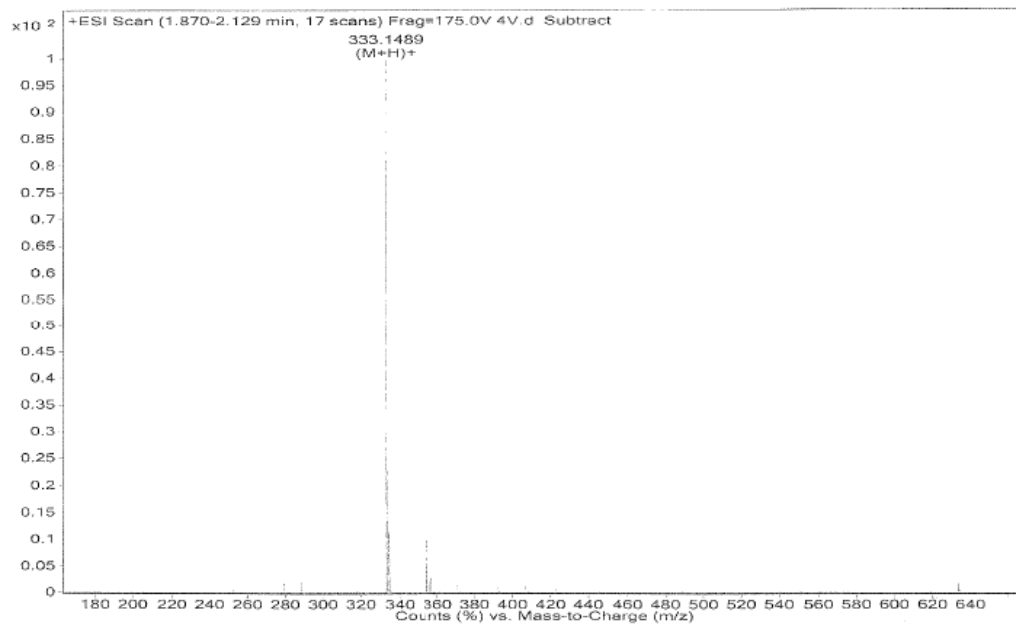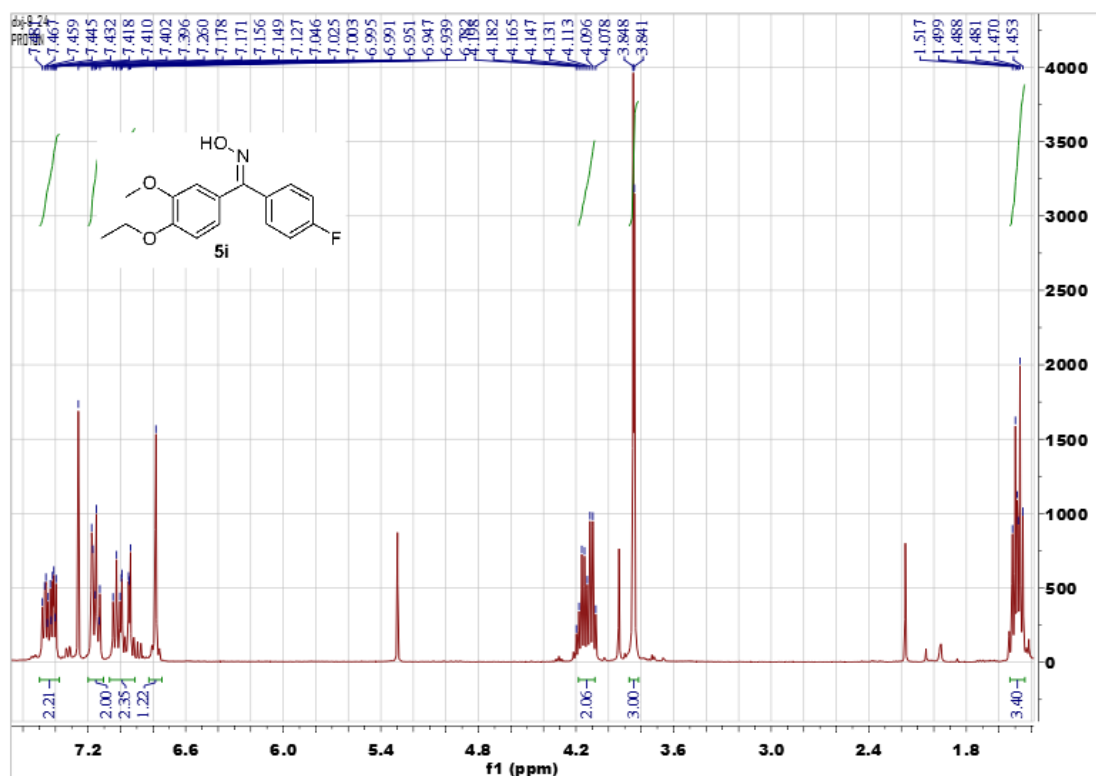

5i

| Sample Name   | lc/ms | Position    | P1-A4     | Instrument Name | Instrument 1 | User Name              |                      |
|---------------|-------|-------------|-----------|-----------------|--------------|------------------------|----------------------|
| Inj Vol       | 1     | InjPosition |           | SampleType      | Sample       | IRM Calibration Status | Some Ions Missed     |
| Data Filename | 5L.d  | ACQ Method  | chen-ms.m | Comment         |              | Acquired Time          | 2/28/2014 3:32:43 PM |

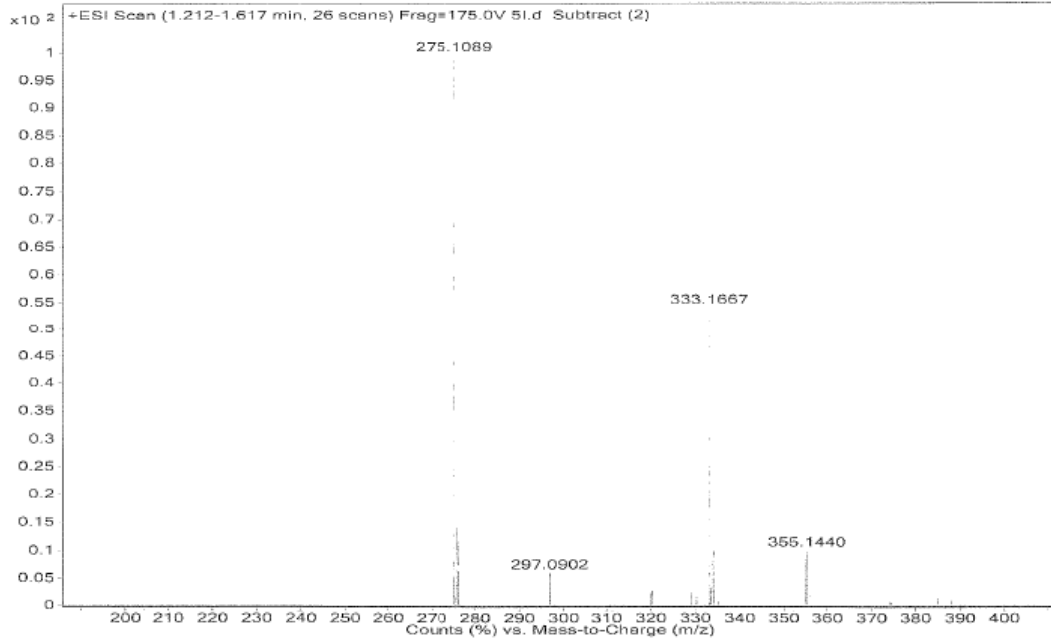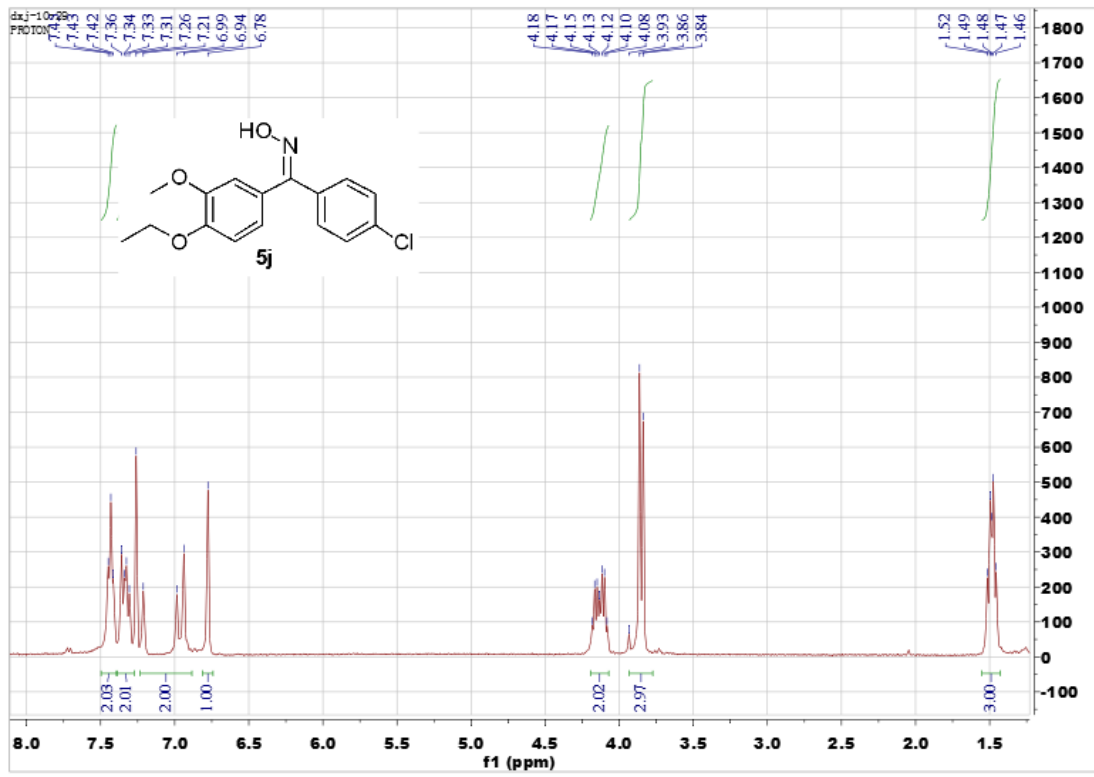

5j

|               |      |             |           |                 |              |                        |                      |
|---------------|------|-------------|-----------|-----------------|--------------|------------------------|----------------------|
| Sample Name   | k/ms | Position    | P1-A5     | Instrument Name | Instrument 1 | User Name              |                      |
| Inj Vel       | 1    | InjPosition |           | SampleType      | Sample       | IRM Calibration Status | Some Ions Missed     |
| Data Filename | 5J.d | ACQ Method  | chem-ms.m | Comment         |              | Acquired Time          | 2/28/2014 3:36:27 PM |

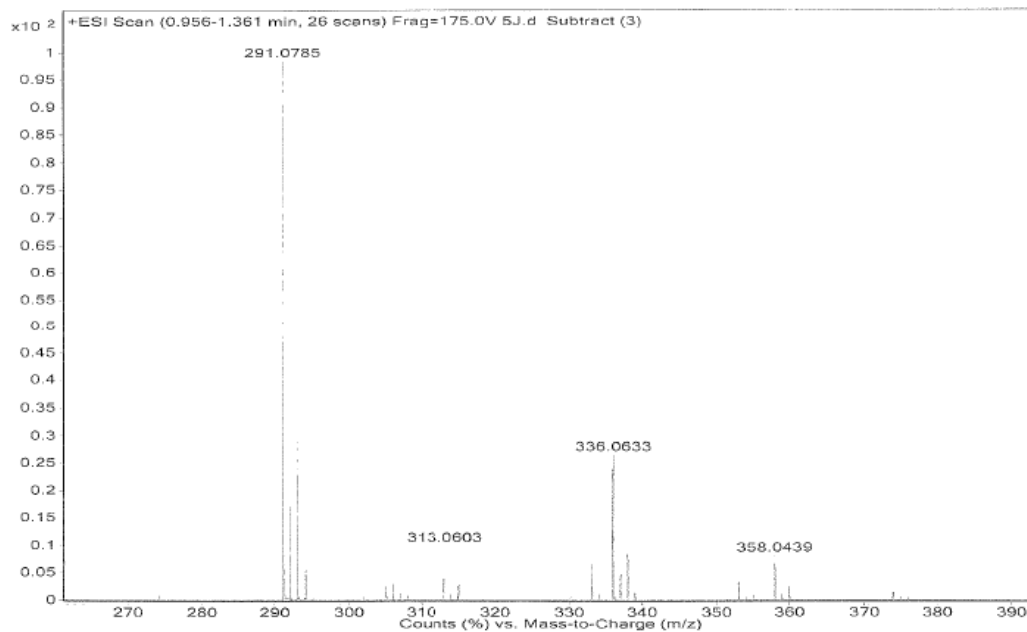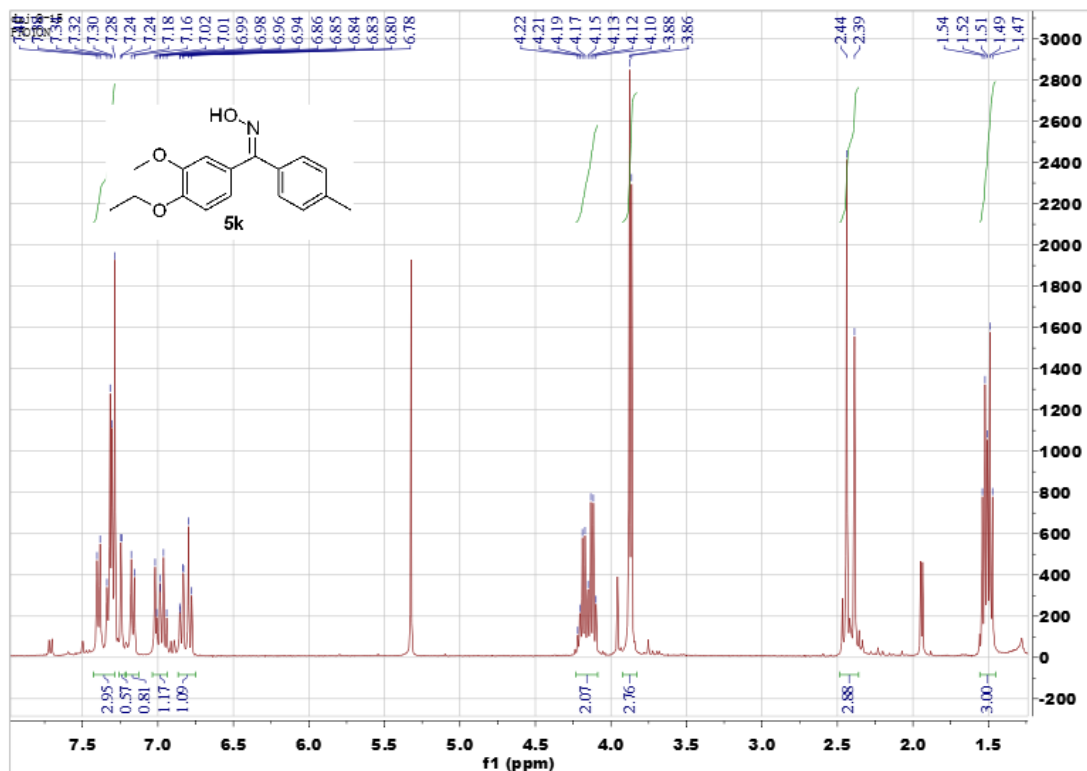

5k

|               |       |             |           |                 |              |                        |                      |
|---------------|-------|-------------|-----------|-----------------|--------------|------------------------|----------------------|
| Sample Name   | Ic/ms | Position    | P1-A6     | Instrument Name | Instrument 1 | User Name              |                      |
| Inj Vol       | 1     | InjPosition |           | SampleType      | Sample       | IRM Calibration Status | Some Ions Missed     |
| Data Filename | 5K.d  | ACQ Method  | chen-ms.m | Comment         |              | Acquired Time          | 2/28/2014 3:40:09 PM |

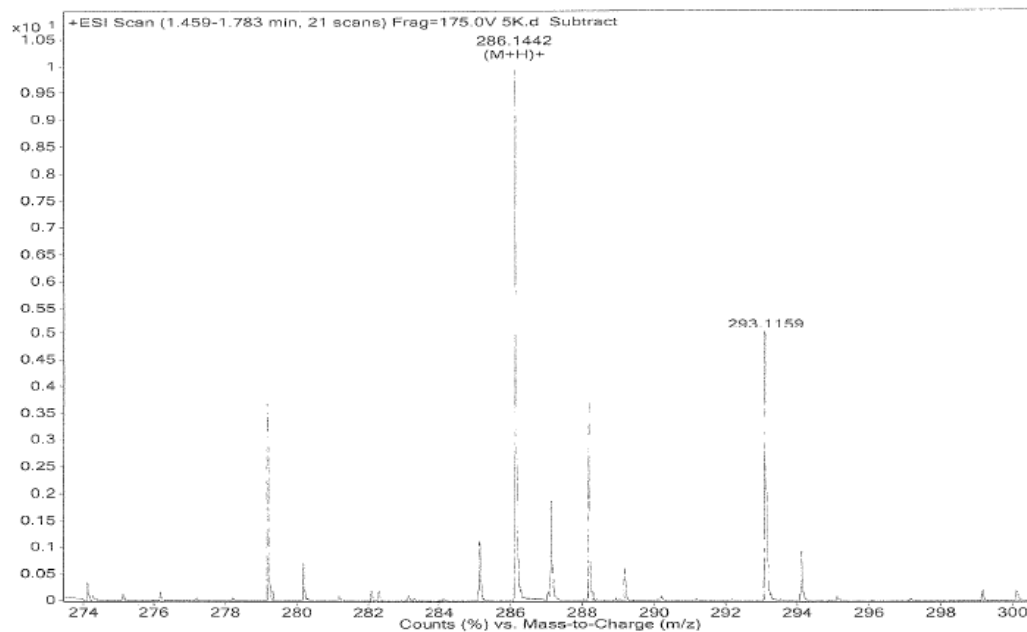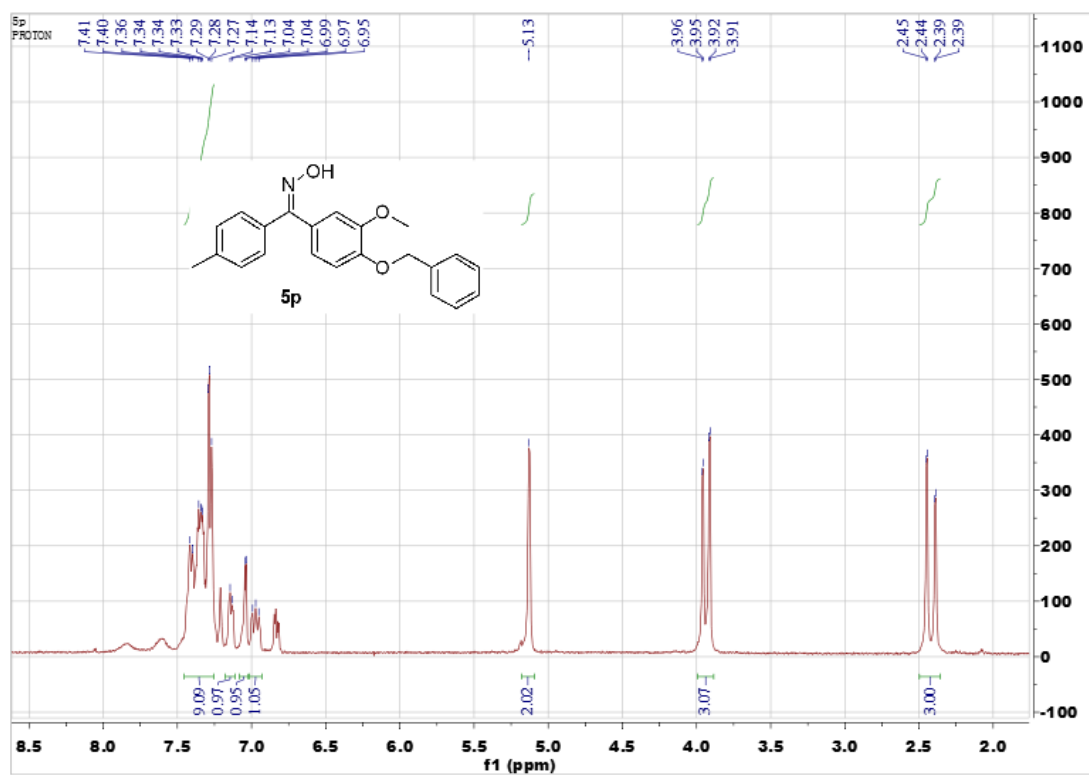

5p



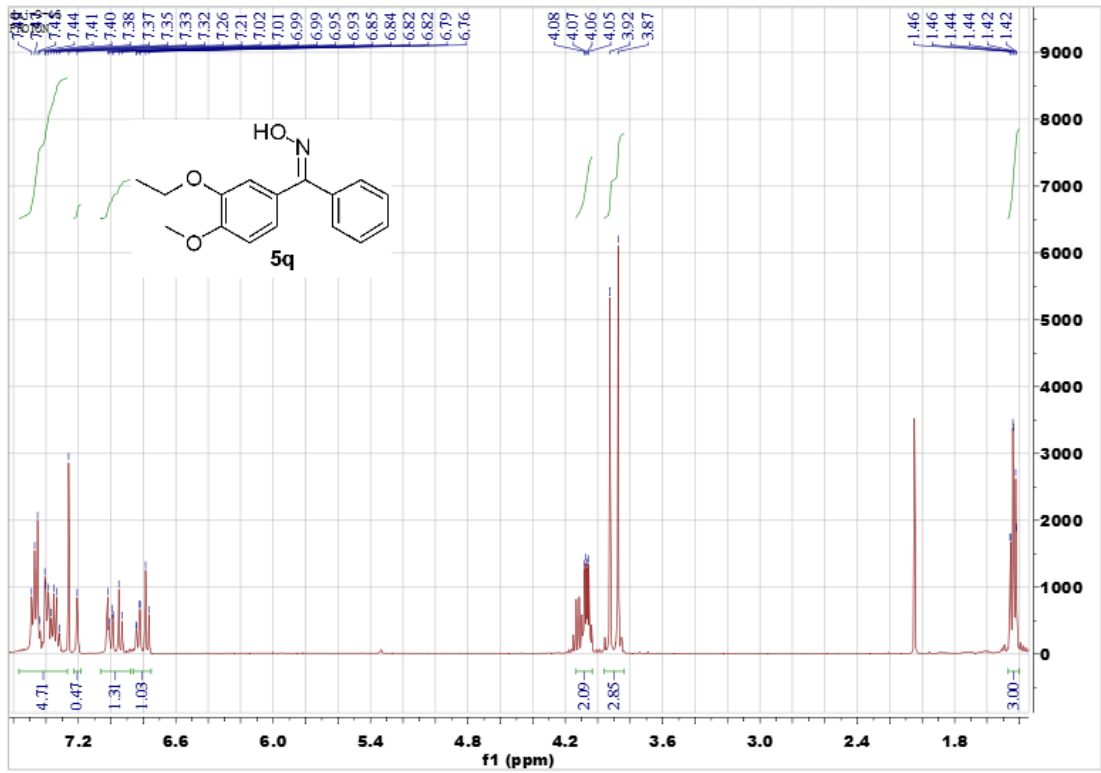

5q

| Sample Name   | lc/ms | Position    | P1-A7     | Instrument Name | Instrument 1 | User Name              | IRM Calibration Status | Some Ions Missed     |
|---------------|-------|-------------|-----------|-----------------|--------------|------------------------|------------------------|----------------------|
| Inj Vol       | 1     | InjPosition |           | SampleType      | Sample       | IRM Calibration Status |                        | Some Ions Missed     |
| Data Filename | SQ.d  | ACQ Method  | chen-ms.m | Comment         |              | Acquired Time          |                        | 2/28/2014 3:43:52 PM |

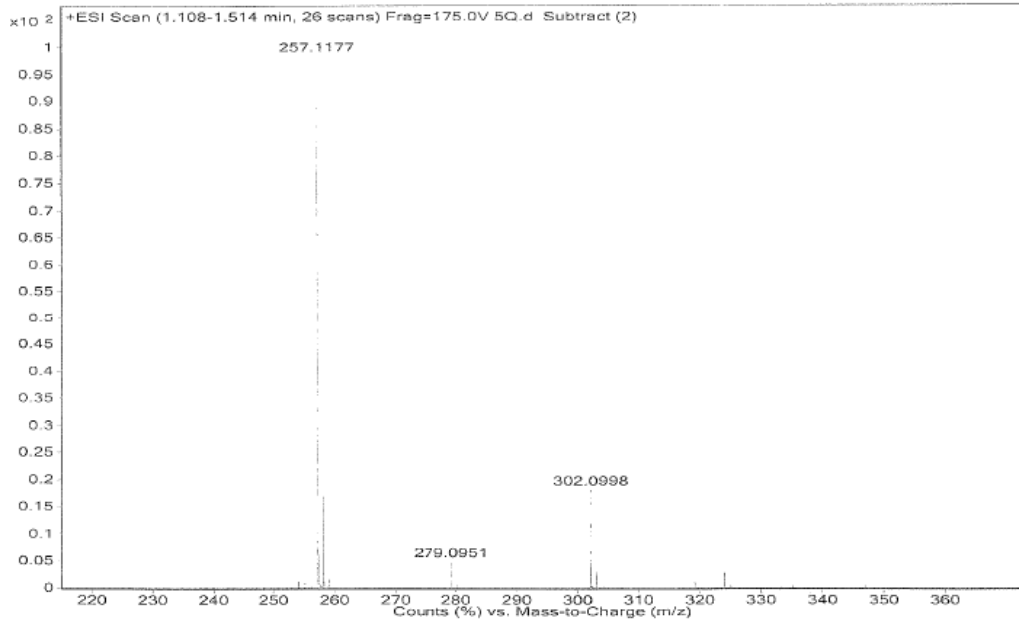

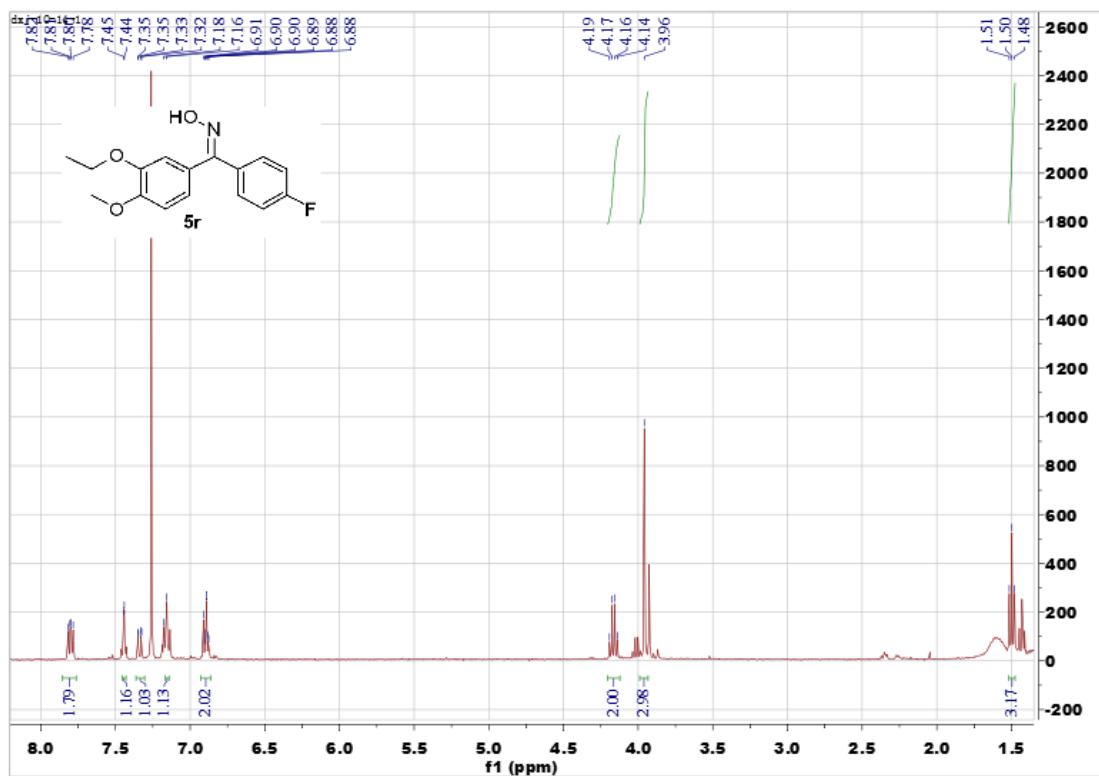

5r

| Sample Name   | IC/MS | Position     | P1-A3      | Instrument Name | Instrument 1 | User Name              |
|---------------|-------|--------------|------------|-----------------|--------------|------------------------|
| Inj Vol       | -1    | Inj Position |            | SampleType      | Sample       | IRM Calibration Status |
| Data Filename | SR.d  | ACQ Method   | chen-ims.m | Comment         |              | Acquired Time          |

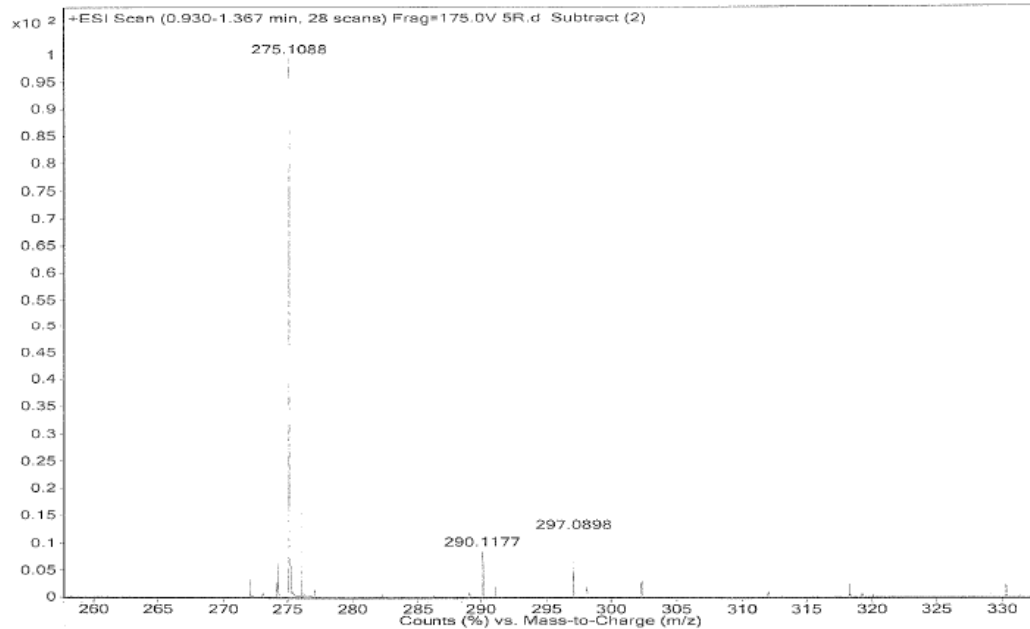

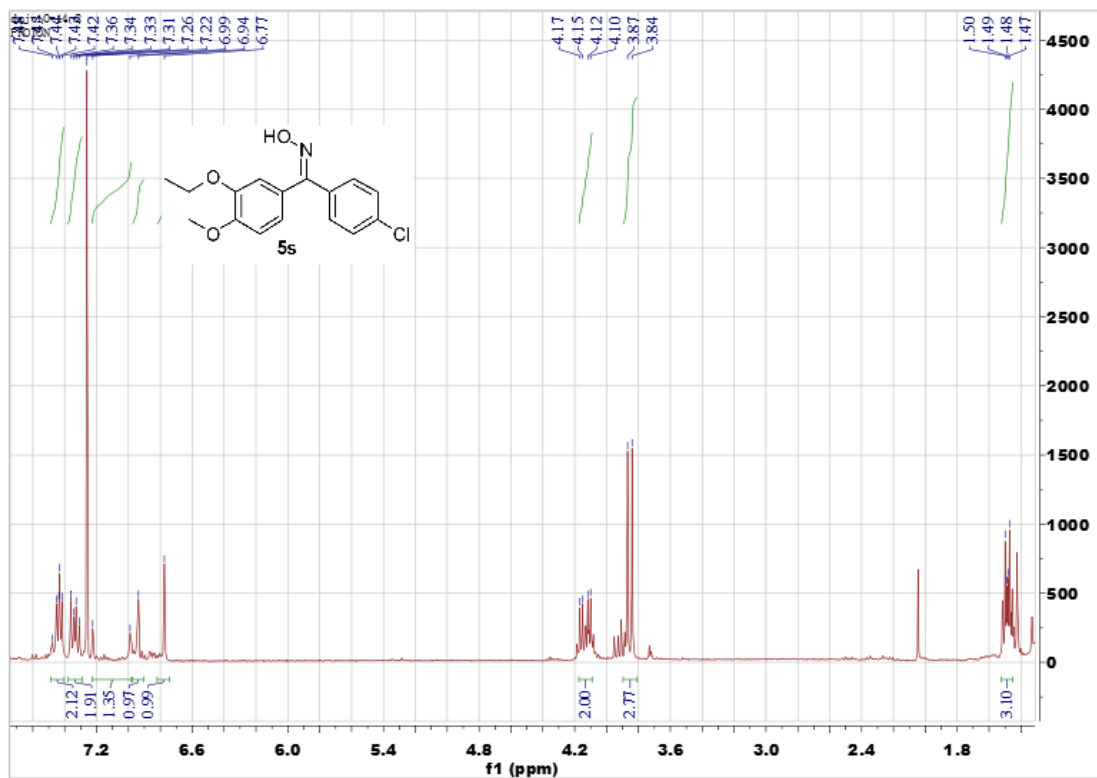

5s

| Sample Name   | IC/MS | Position    | P1-A4     | Instrument Name | Instrument 1 | User Name              | IRM Calibration Status | Some Ions Missed     |
|---------------|-------|-------------|-----------|-----------------|--------------|------------------------|------------------------|----------------------|
| Inj Vol       | 1     | InjPosition |           | SampleType      | Sample       | IRM Calibration Status |                        | 2/28/2014 4:42:25 PM |
| Data Filename | 55.d  | ACQ Method  | clen-ms.m | Comment         |              | Acquired Time          |                        |                      |

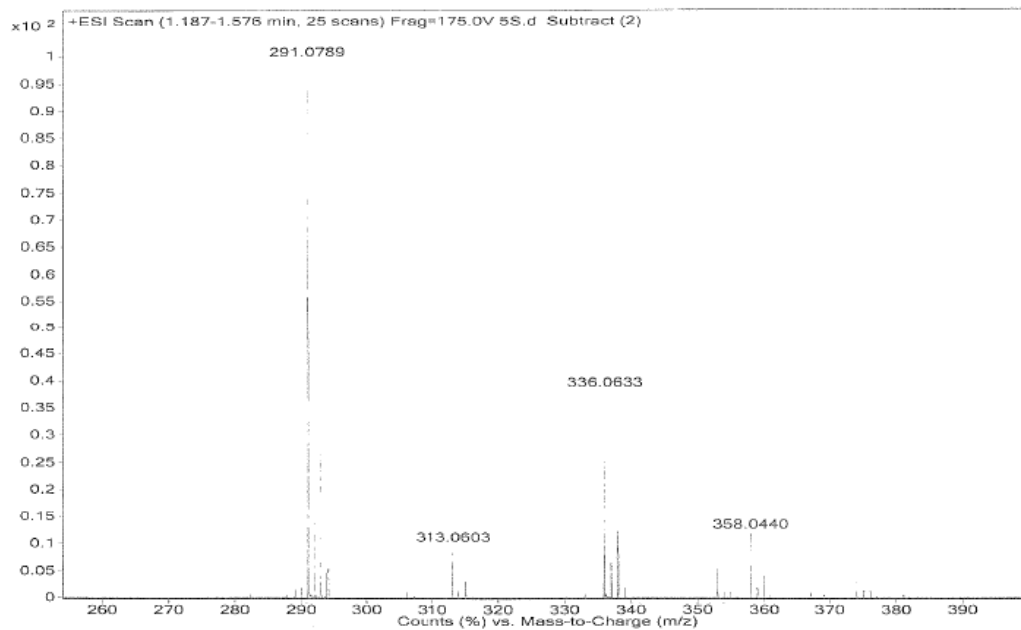

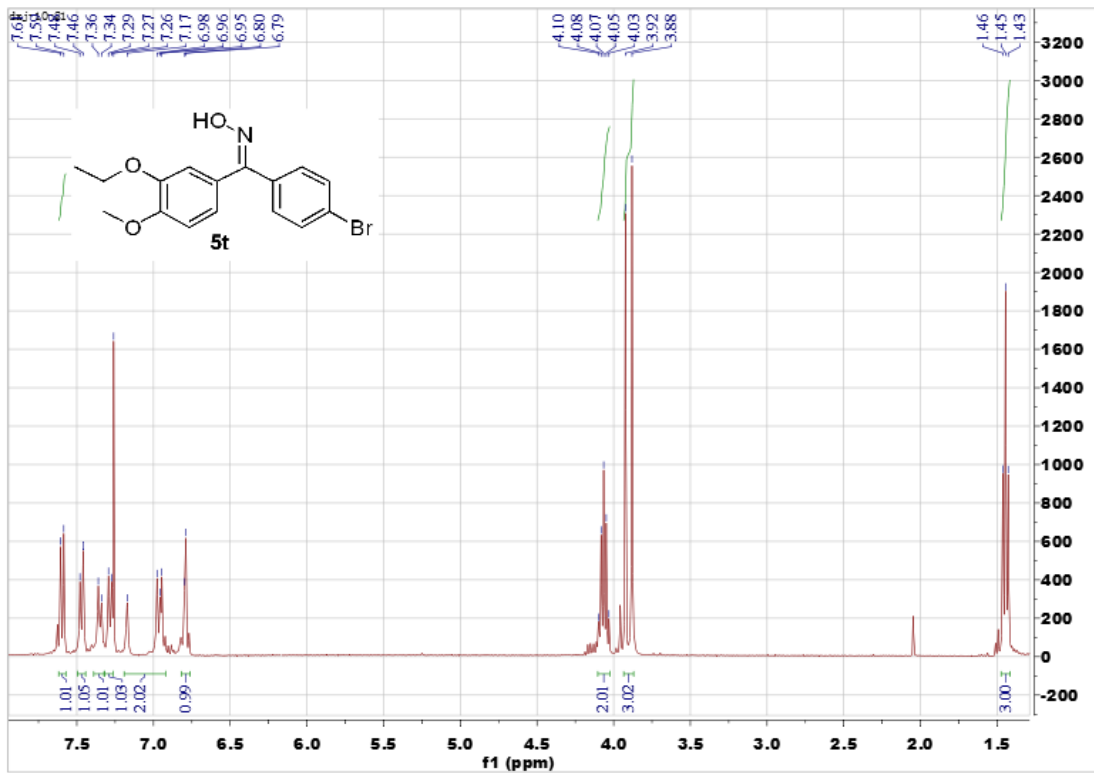

5t

| Sample Name   | lc/ms | Position     | PI-A5     | Instrument Name | Instrument 1 | User Name     | IRM Calibration Status | Some Ions Missed     |
|---------------|-------|--------------|-----------|-----------------|--------------|---------------|------------------------|----------------------|
| Inj Vol       | 1     | Inj Position |           | Sample Type     | Sample       |               |                        |                      |
| Data Filename | 5T.d  | ACQ Method   | chen-ms.m | Comment         |              | Acquired Time |                        | 2/28/2014 4:46:07 PM |

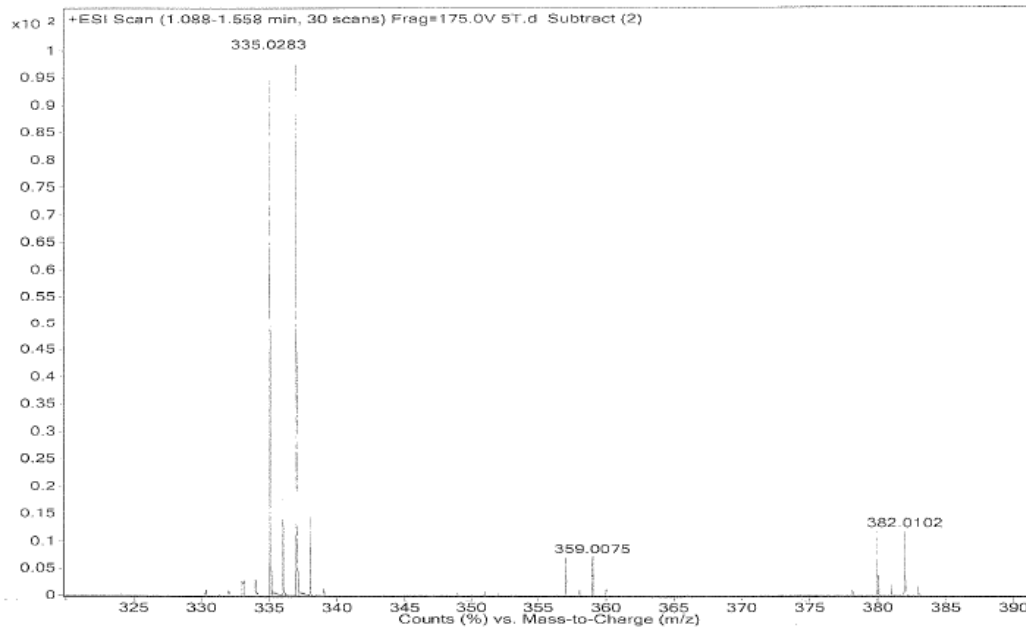

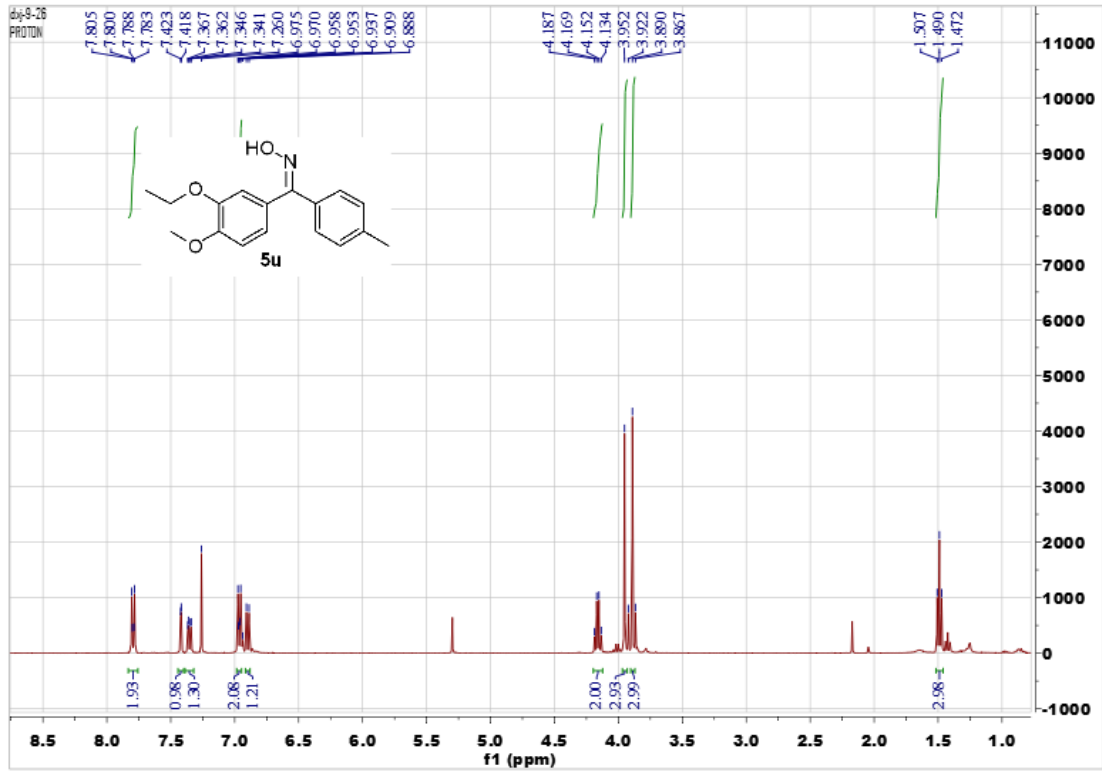

5u

| Sample Name   | lc/ms | Position    | P1-A5      | Instrument Name | Instrument 1 | User Name              |
|---------------|-------|-------------|------------|-----------------|--------------|------------------------|
| Inj Vol       | 1     | InjPosition |            | SampleType      | Sample       | IRM Calibration Status |
| Data Filename | 5U.d  | ACQ Method  | chen-ins.m | Comment         |              | Acquired Time          |

Some Ions Missed  
2/28/2014 4:49:50 PM

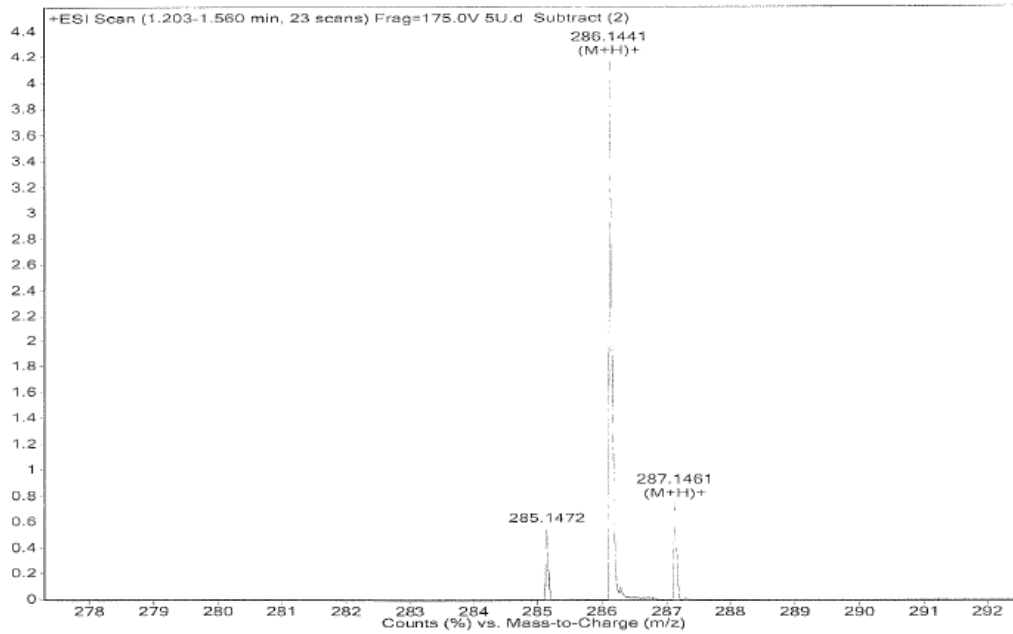

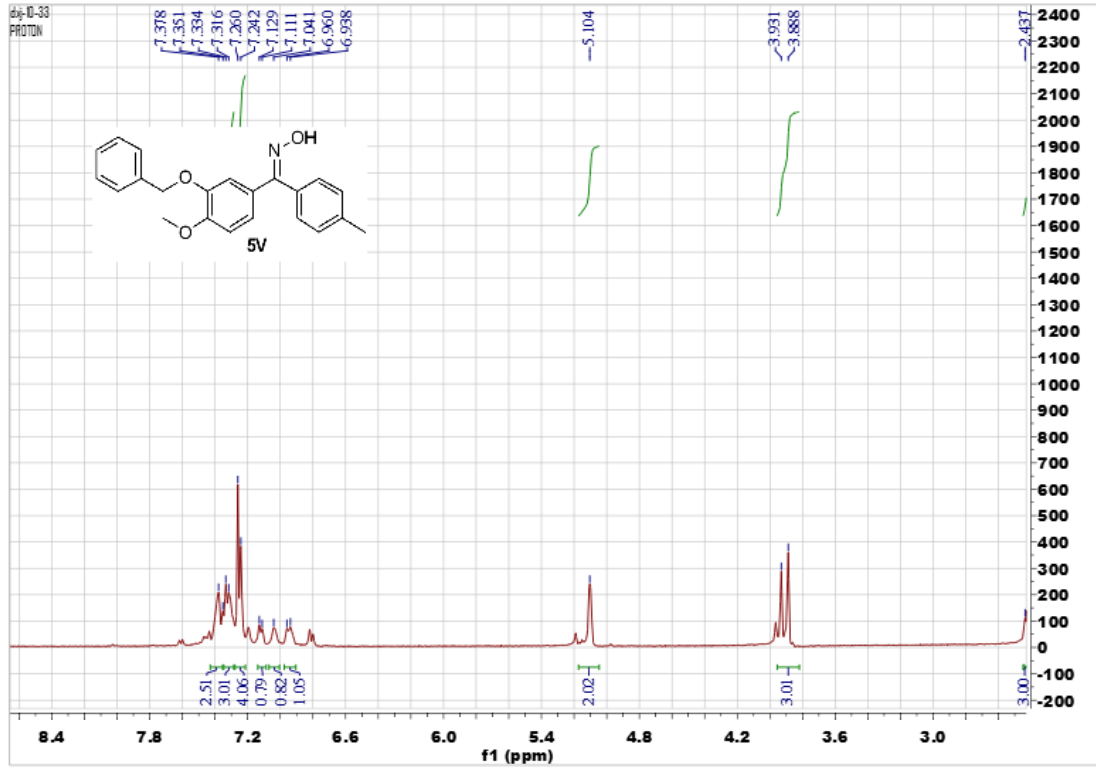

5v

| Sample Name   | lc/ms | Position    | P1-A7     | Instrument Name | Instrument 1 | User Name | IRM Calibration Status | Some Ions Missed     |
|---------------|-------|-------------|-----------|-----------------|--------------|-----------|------------------------|----------------------|
| Inj Vol       | 1     | InjPosition |           | SampleType      | Sample       |           |                        |                      |
| Data Filename | 5V.d  | ACQ Method  | chen-ms.m | Comment         |              |           | Acquired Time          | 2/26/2014 4:53:31 PM |

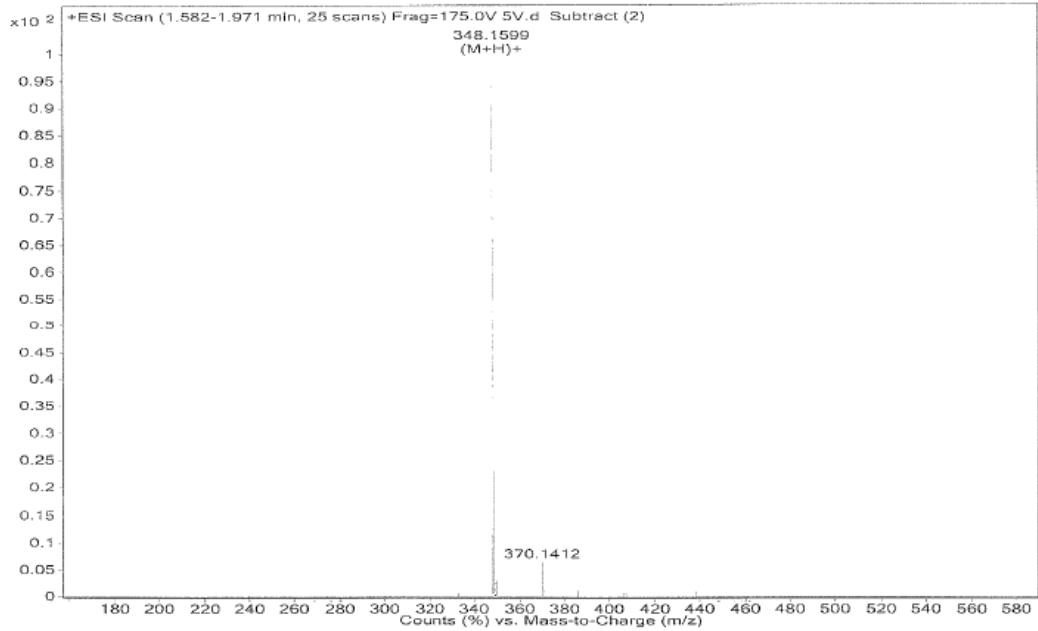

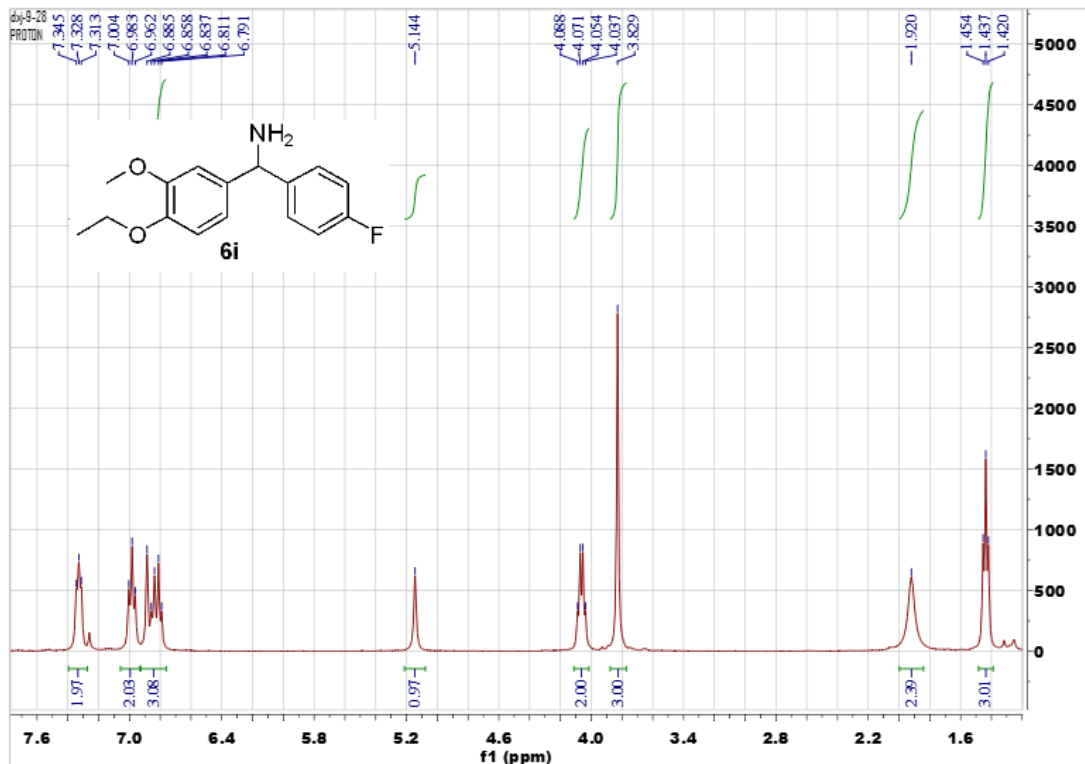

6i

| Sample Name   | IC/MS | Position    | P1-A3     | Instrument Name | Instrument 1 | User Name     | IRM Calibration Status | Some Ions Missed     |
|---------------|-------|-------------|-----------|-----------------|--------------|---------------|------------------------|----------------------|
| Inj Vol       | 1     | InjPosition |           | SampleType      | Sample       |               |                        |                      |
| Data Filename | 61.d  | ACQ Method  | chen-ms.m | Comment         |              | Acquired Time |                        | 2/28/2014 5:23:37 PM |

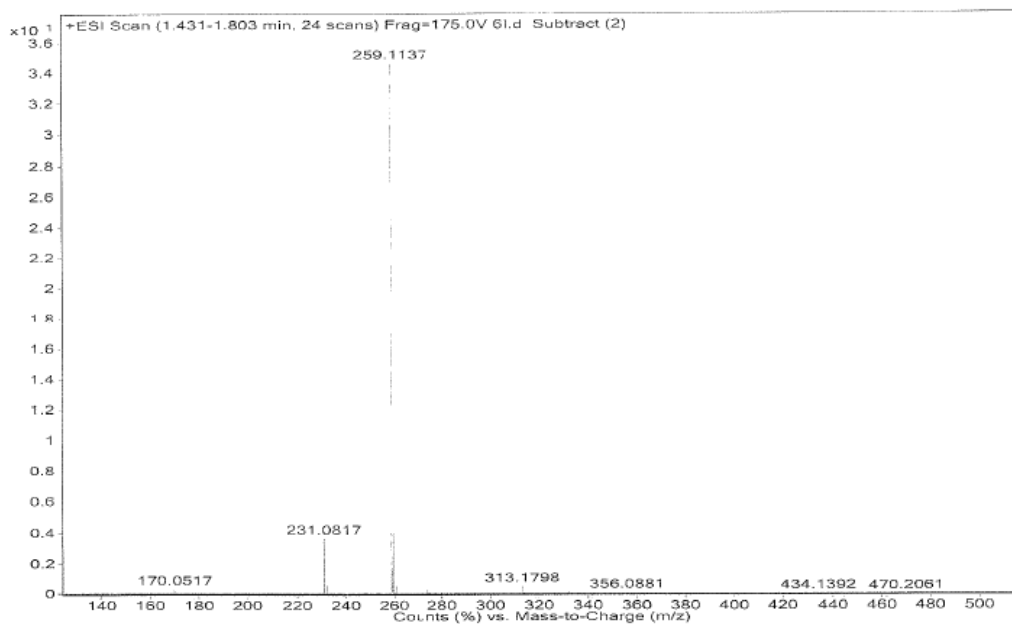

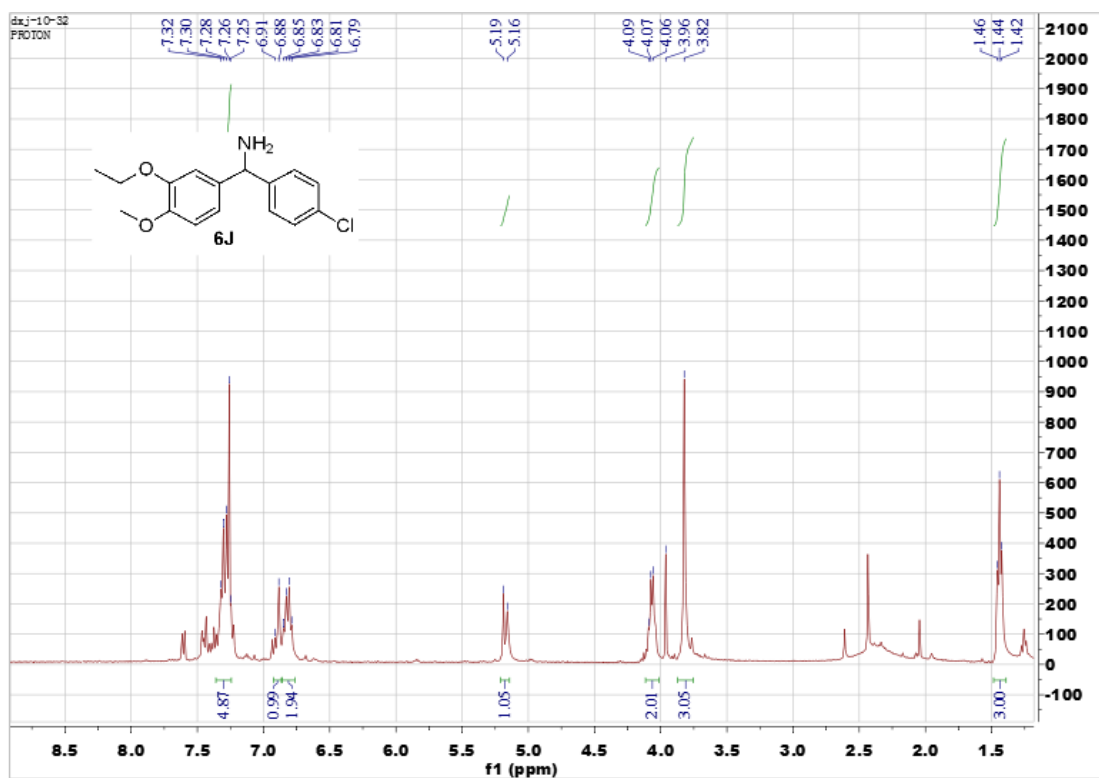

6j

| Sample Name   | lc/ms | Position    | P1-A4     | Instrument Name | Instrument 1 | User Name     | IRM Calibration Status | Some Ions Missed     |
|---------------|-------|-------------|-----------|-----------------|--------------|---------------|------------------------|----------------------|
| Inj Vol       | 1     | InjPosition |           | SampleType      | Sample       |               |                        |                      |
| Data Filename | 6j.d  | ACQ Method  | chem-ms.m | Comment         |              | Acquired Time |                        | 2/28/2014 5:27:20 PM |

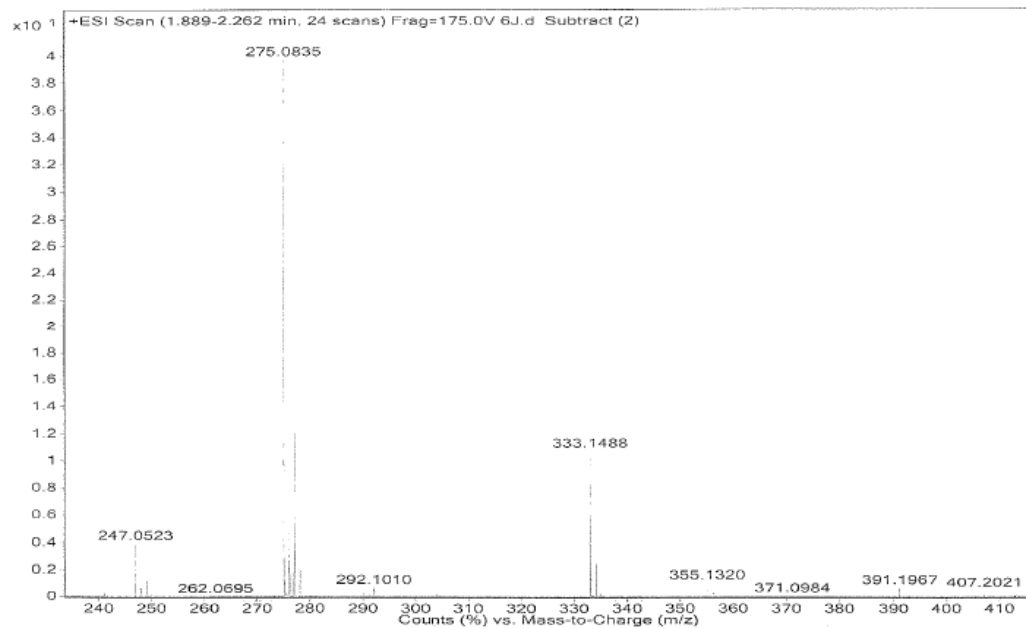



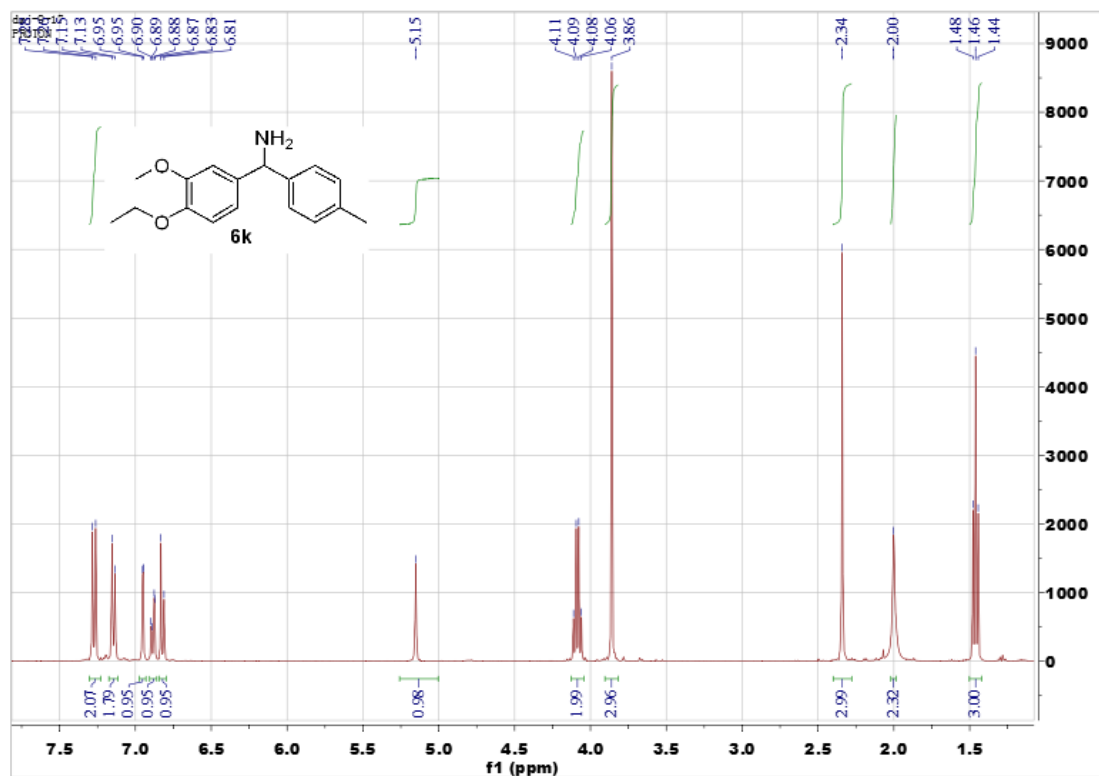

6k

|               |       |             |           |                 |              |                        |                     |
|---------------|-------|-------------|-----------|-----------------|--------------|------------------------|---------------------|
| Sample Name   | lc/ms | Position    | PI-AL     | Instrument Name | Instrument 1 | User Name              |                     |
| Inj Vol       | 1     | InjPosition |           | SampleType      | Sample       | IRM Calibration Status | Some Ions Missed    |
| Data Filename | 6K.d  | ACQ Method  | chen-ms.m | Comment         |              | Acquired Time          | 3/3/2014 8:56:45 AM |

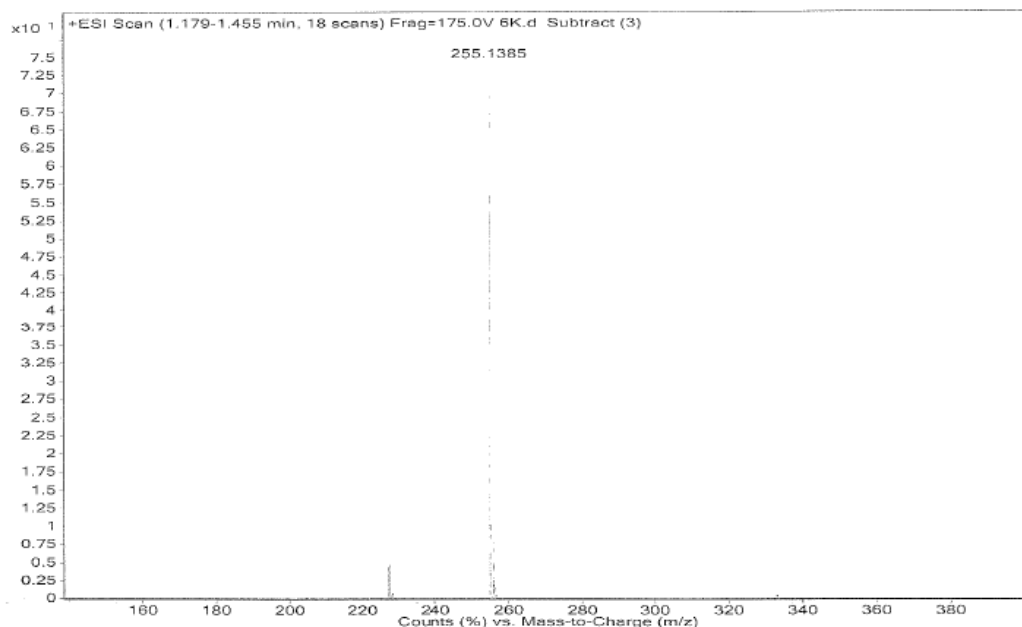

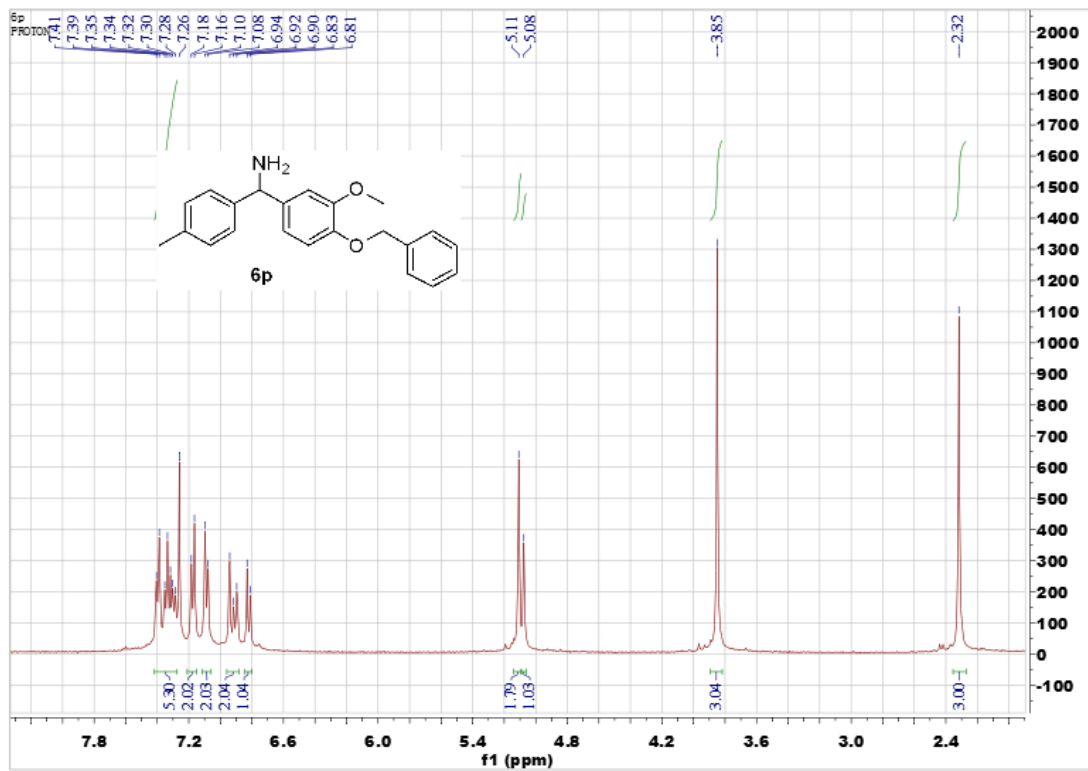

6p

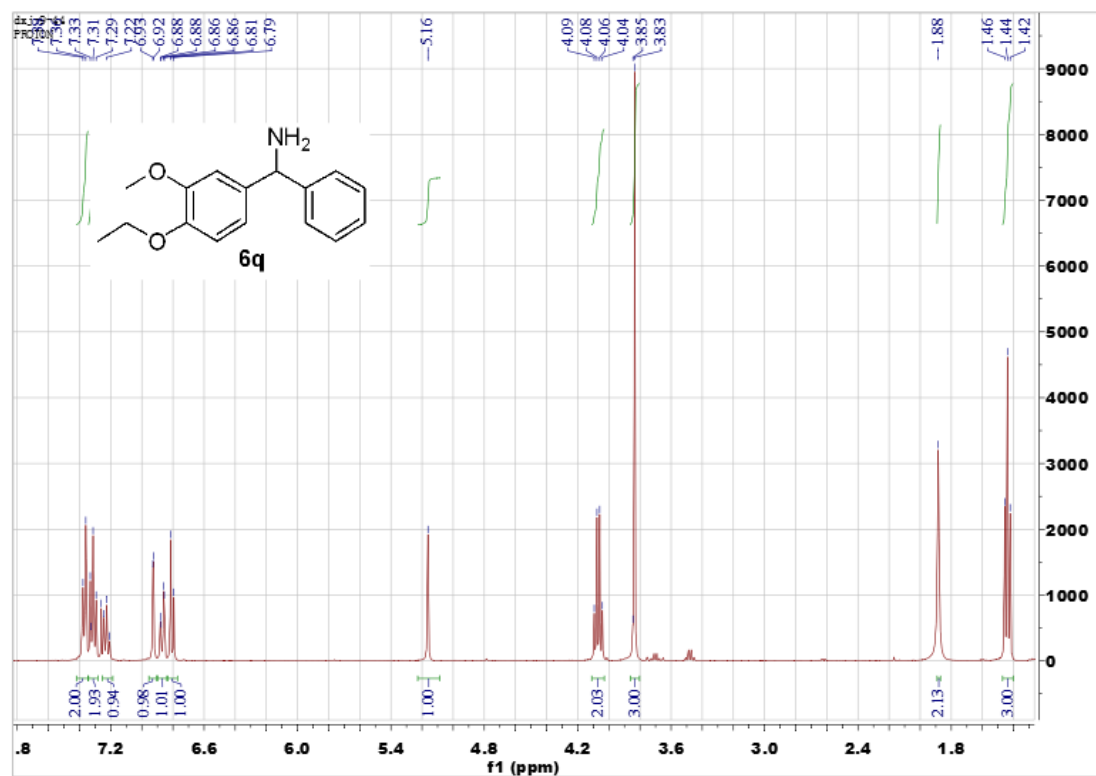

6q

|               |       |             |           |                 |              |                        |                     |
|---------------|-------|-------------|-----------|-----------------|--------------|------------------------|---------------------|
| Sample Name   | lc/ms | Position    | P1-A2     | Instrument Name | Instrument 1 | User Name              |                     |
| Inj Vol       | 1     | InjPosition |           | SampleType      | Sample       | IRM Calibration Status | Some Ions Missed    |
| Data Filename | 6Q.d  | ACQ Method  | chem-ms.m | Comment         |              | Acquired Time          | 3/3/2014 9:00:26 AM |

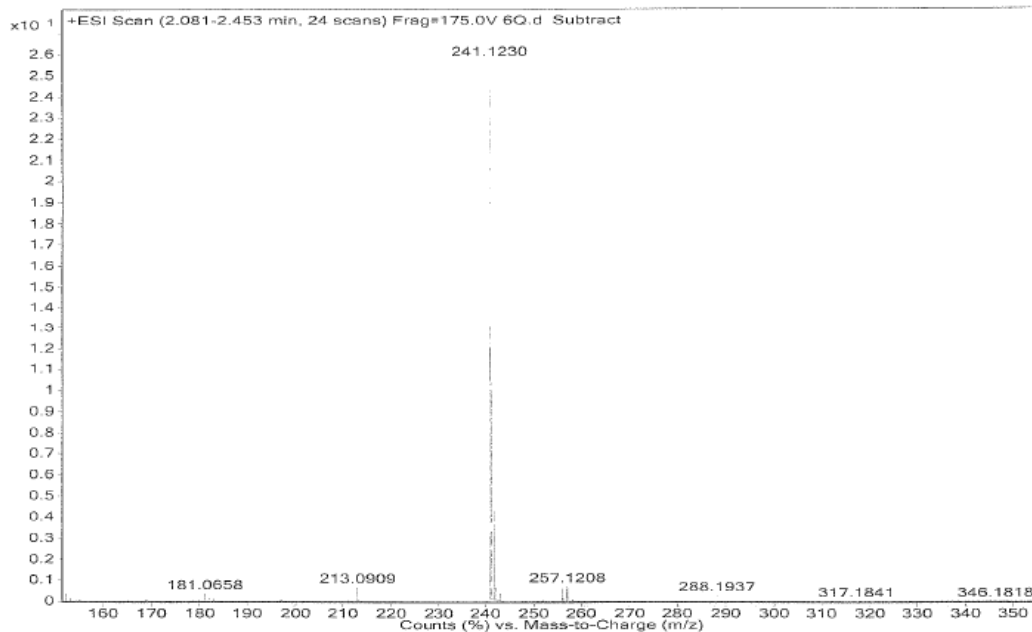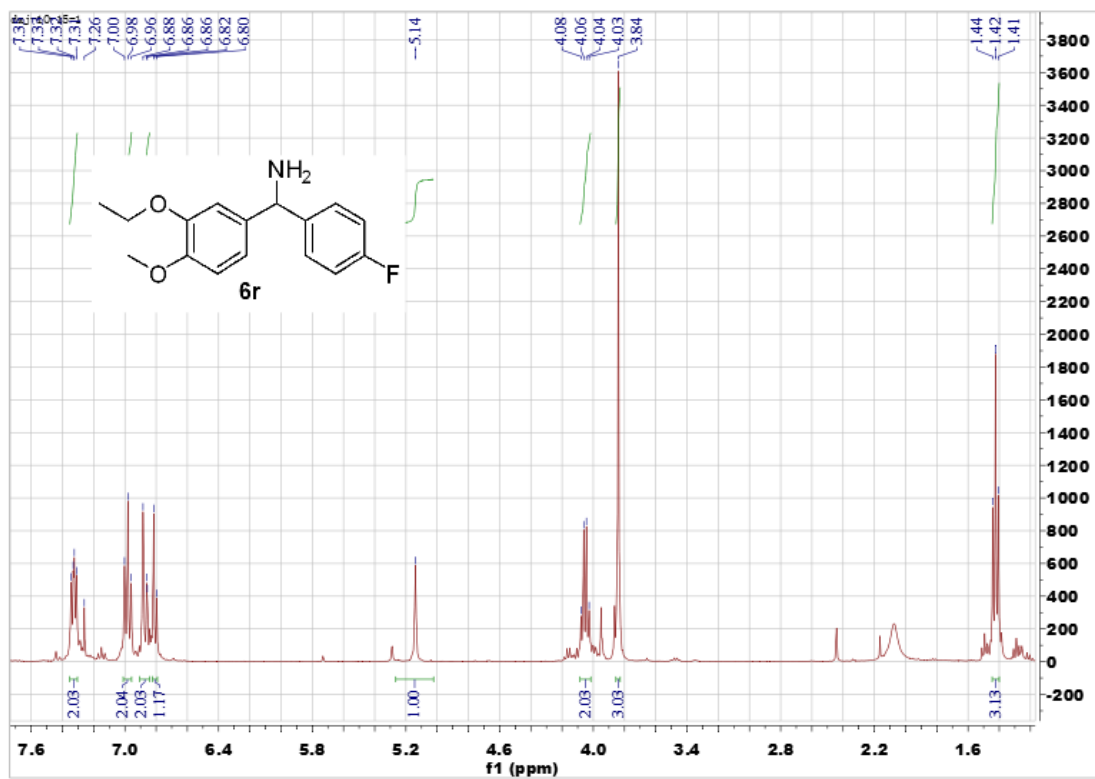

6r

|               |      |             |           |                 |              |                        |                     |
|---------------|------|-------------|-----------|-----------------|--------------|------------------------|---------------------|
| Sample Name   | k/ms | Position    | P1-A3     | Instrument Name | Instrument 1 | User Name              |                     |
| Inj Vol       | 1    | InjPosition |           | SampleType      | Sample       | IRM Calibration Status | Some Ions Missed    |
| Data Filename | 6R.d | ACQ Method  | chem-ms.m | Comment         |              | Acquired Time          | 3/3/2014 9:04:08 AM |

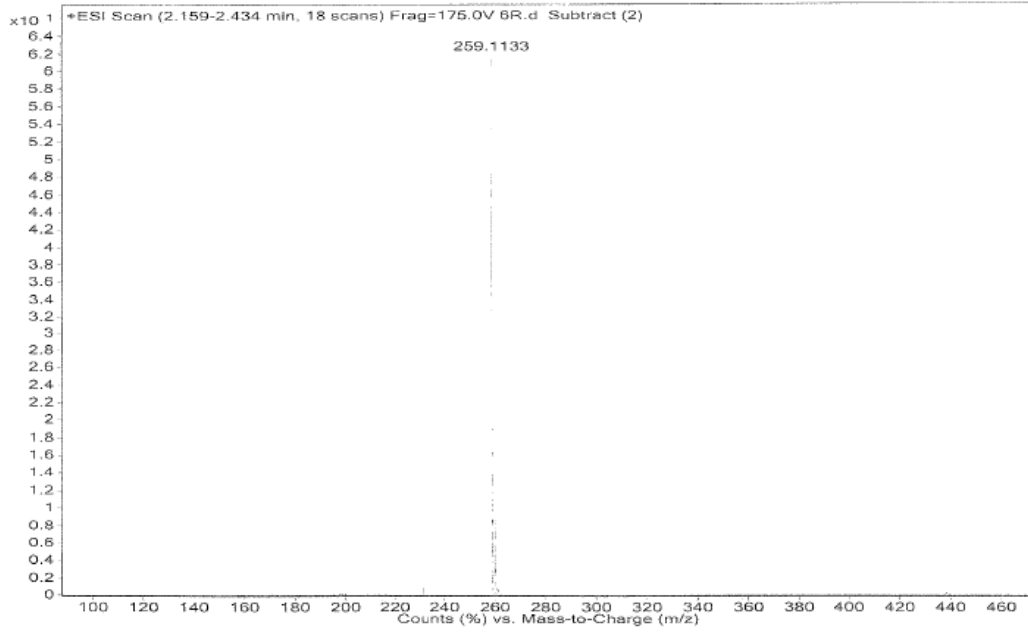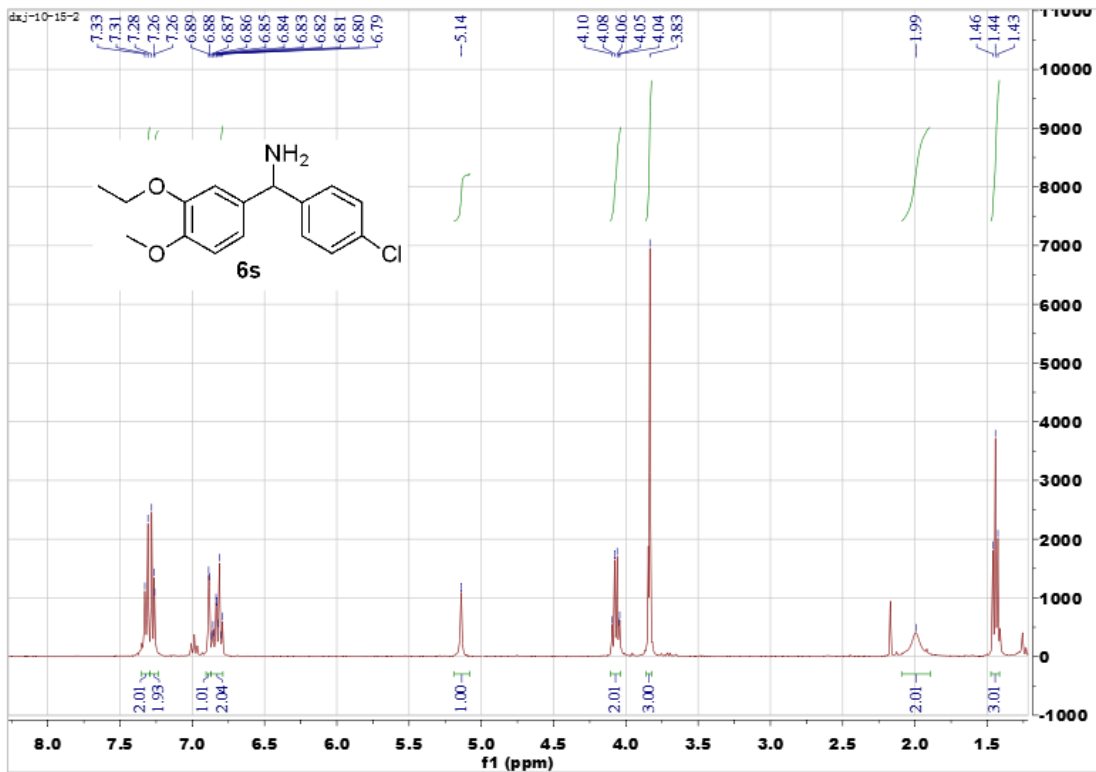

6s

|               |       |             |            |                 |              |                        |                     |
|---------------|-------|-------------|------------|-----------------|--------------|------------------------|---------------------|
| Sample Name   | lc/ms | Position    | P1-A4      | Instrument Name | Instrument 1 | User Name              |                     |
| Inj Vol       | 1     | InjPosition |            | SampleType      | Sample       | IRM Calibration Status | Some Ions Missed    |
| Data Filename | 6S.d  | ACQ Method  | chem-ims.m | Comment         |              | Acquired Time          | 3/3/2014 9:07:49 AM |

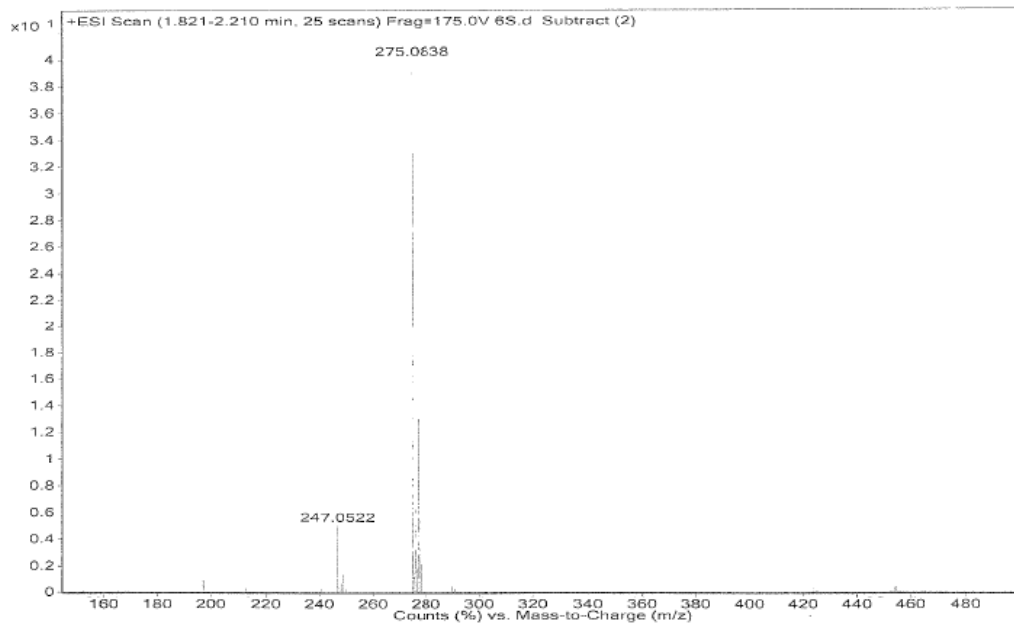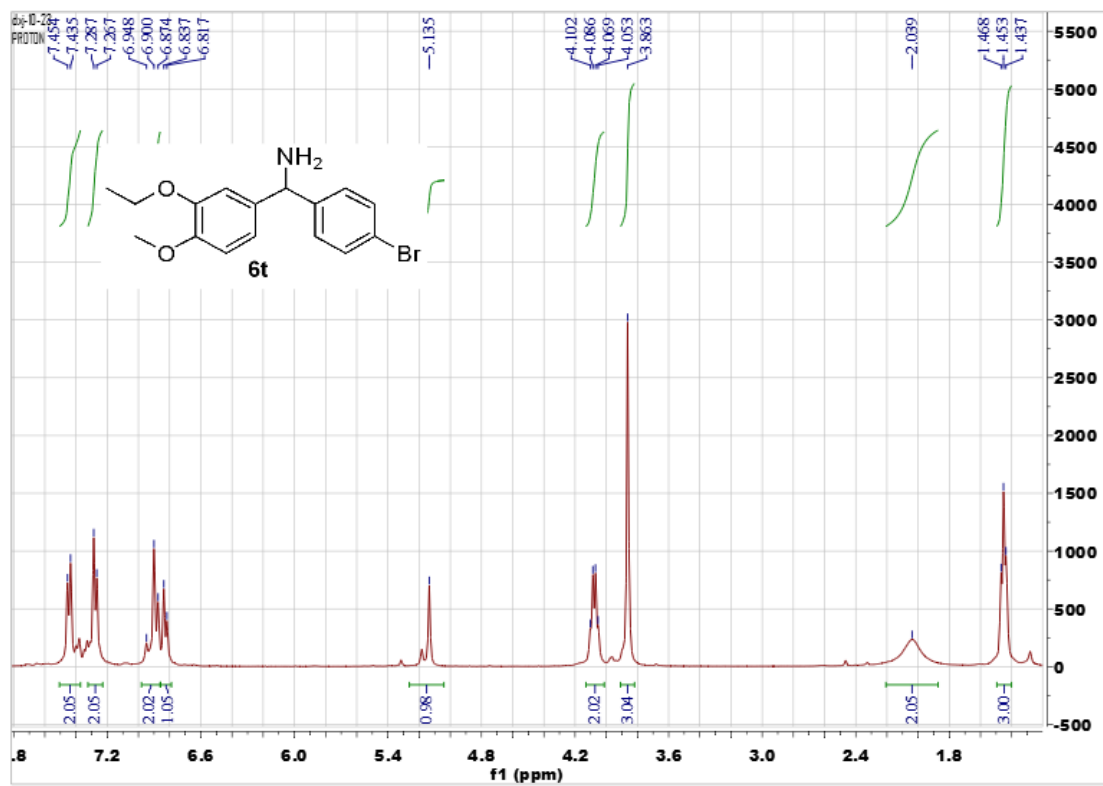

6t

| Sample Name   | lc/ms | Position    | PI-A5      | Instrument Name | Instrument 1 | User Name              |                     |
|---------------|-------|-------------|------------|-----------------|--------------|------------------------|---------------------|
| Inj Vol       | 1     | InjPosition |            | SampleType      | Sample       | IRM Calibration Status | Some Ions Missed    |
| Data Filename | 6T.d  | ACQ Method  | chem-ims.m | Comment         |              | Acquired Time          | 3/3/2014 9:11:31 AM |

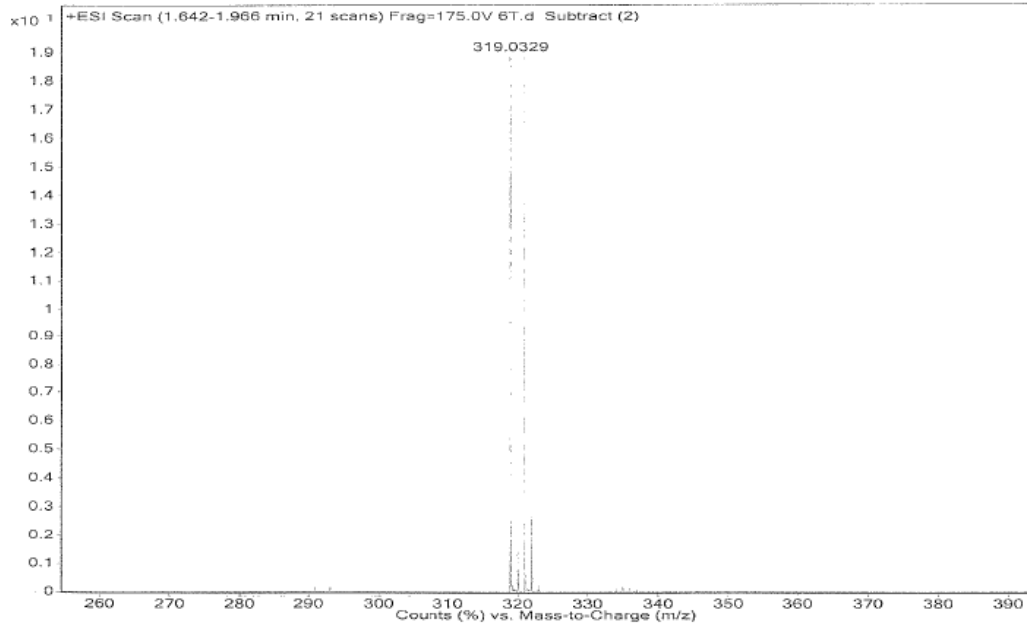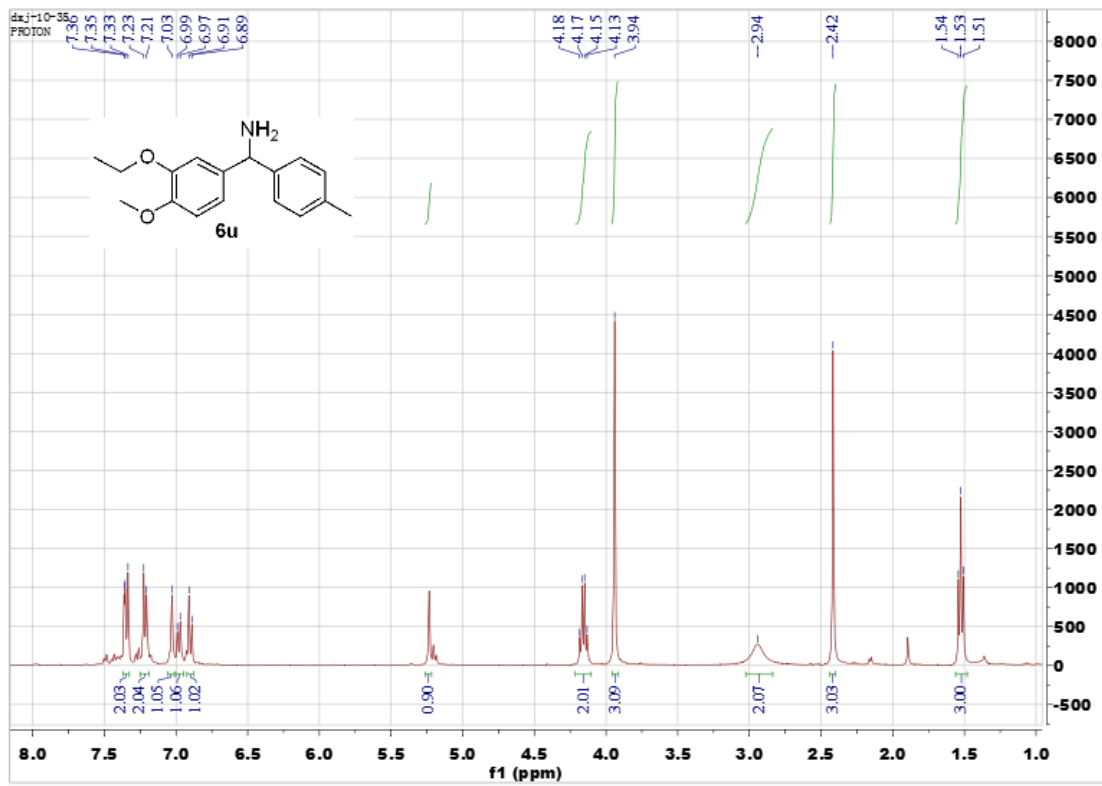

6u

|               |       |             |           |                 |              |                        |                     |
|---------------|-------|-------------|-----------|-----------------|--------------|------------------------|---------------------|
| Sample Name   | l2/ms | Position    | P1-A6     | Instrument Name | Instrument 1 | User Name              |                     |
| Inj Vol       | 1     | InjPosition |           | SampleType      | Sample       | IRM Calibration Status | Some Ions Missed    |
| Data Filename | 6U.d  | ACQ Method  | chen-ms.m | Comment         |              | Acquired Time          | 3/3/2014 9:15:14 AM |

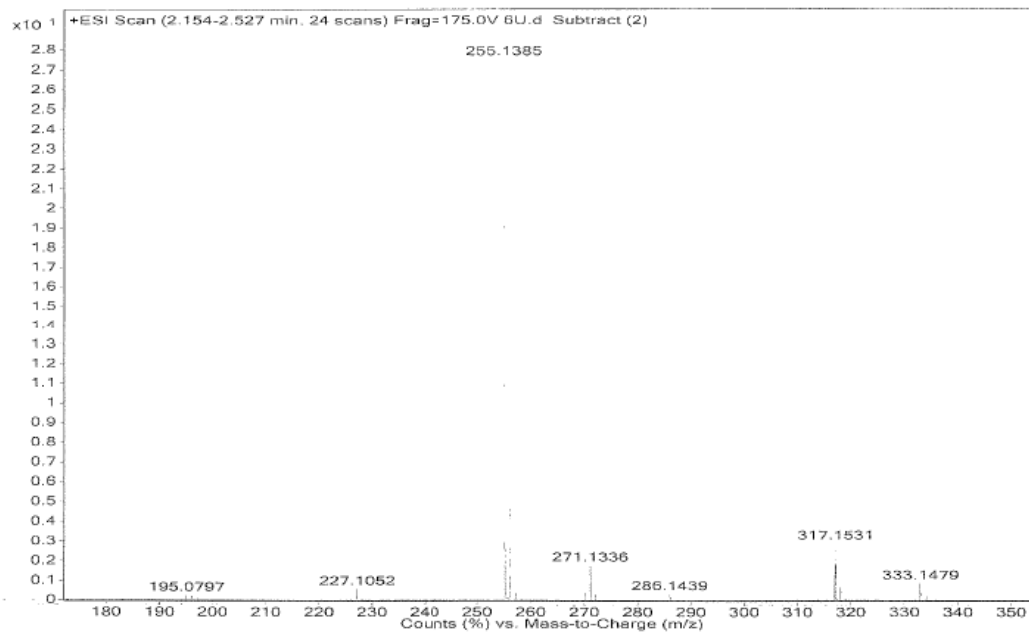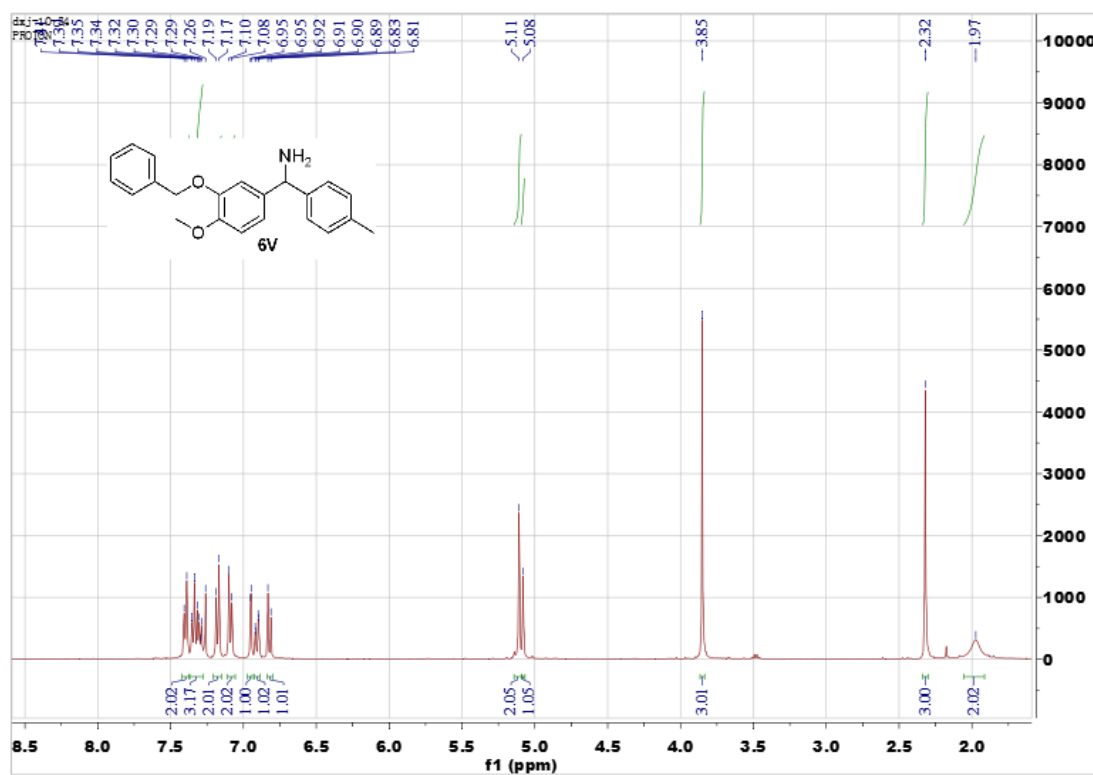

6V

|               |      |             |           |                 |              |                        |                     |
|---------------|------|-------------|-----------|-----------------|--------------|------------------------|---------------------|
| Sample Name   | k/ms | Position    | P1-A7     | Instrument Name | Instrument 1 | User Name              |                     |
| Inj Vol       | 1    | InjPosition |           | SampleType      | Sample       | IRM Calibration Status | Some Ions Missed    |
| Data Filename | 6V.d | ACQ Method  | chen-ms.m | Comment         |              | Acquired Time          | 3/3/2014 9:18:54 AM |

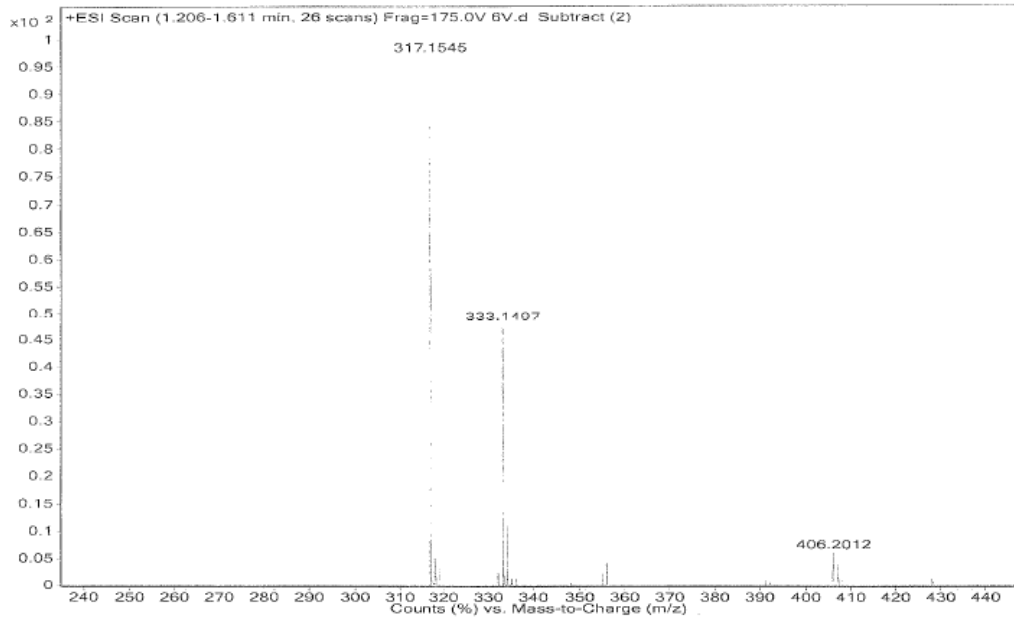

9a

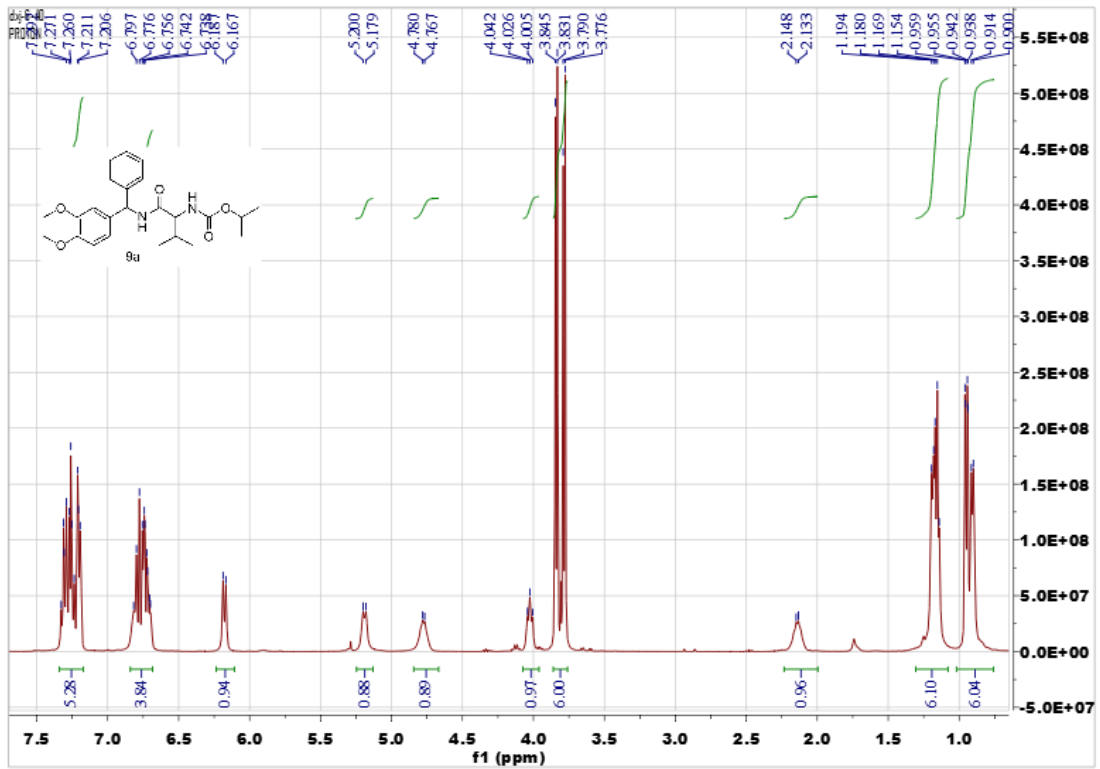



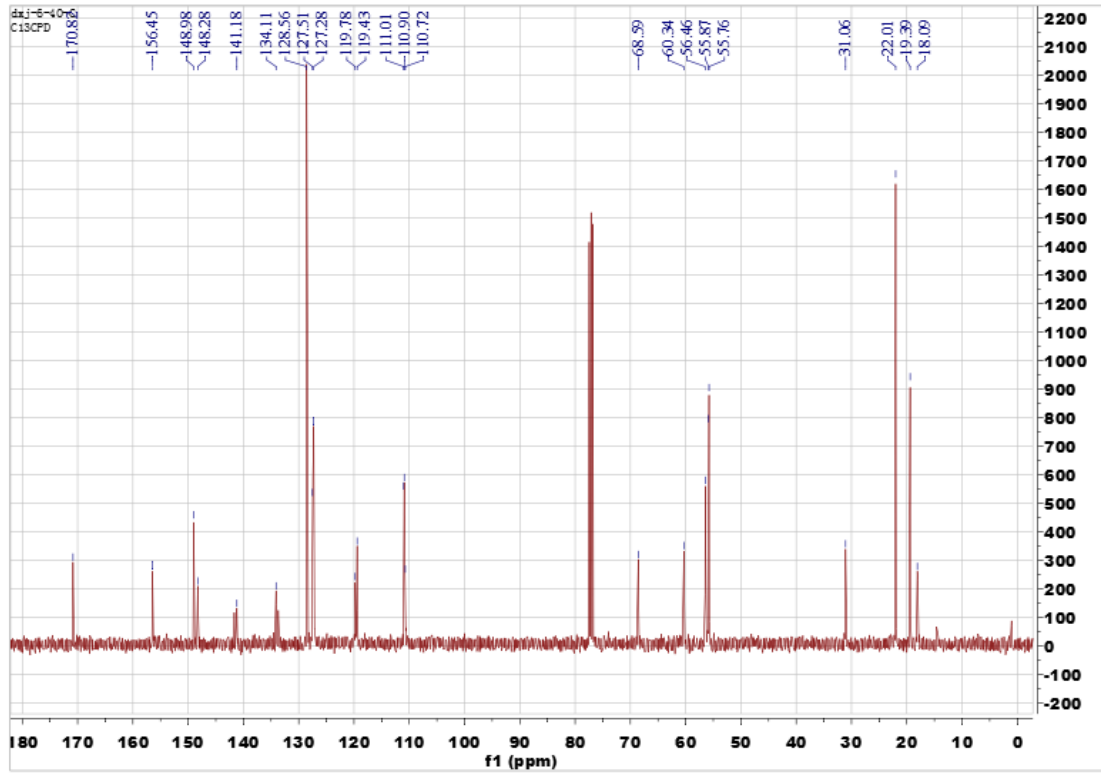

| Sample Name   | k/ms  | Position    | P1-A1     | Instrument Name | Instrument 1 | User Name              | Some Ions Missed      |
|---------------|-------|-------------|-----------|-----------------|--------------|------------------------|-----------------------|
| Inj Vol       | 2     | InjPosition |           | SampleType      | Sample       | IRM Calibration Status | 9/23/2013 10:19:27 AM |
| Data Filename | I-1.d | ACQ Method  | chen-ms.m | Comment         |              | Acquired Time          |                       |

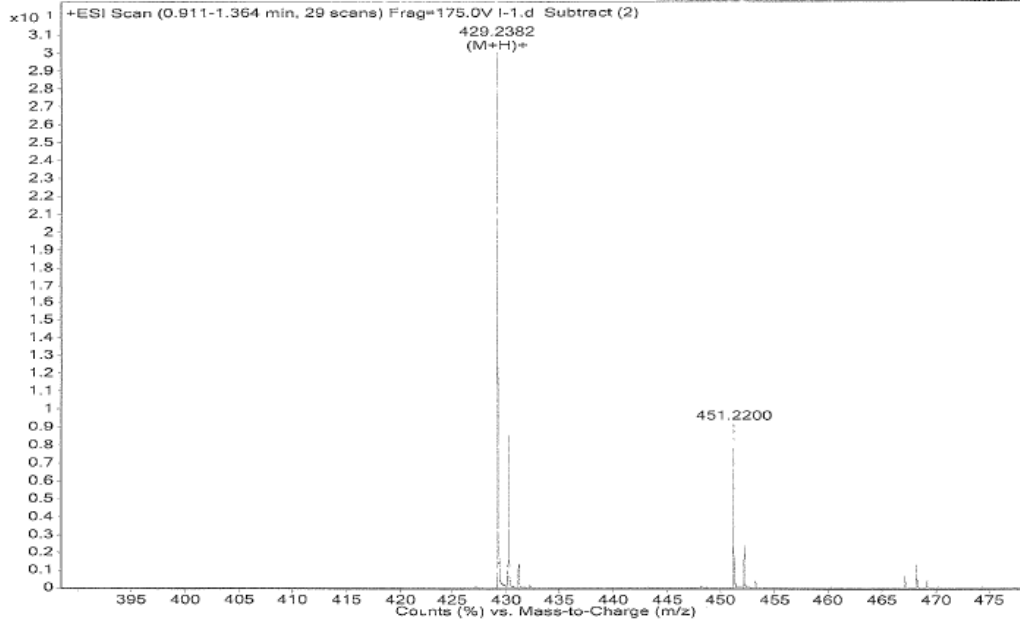

9b

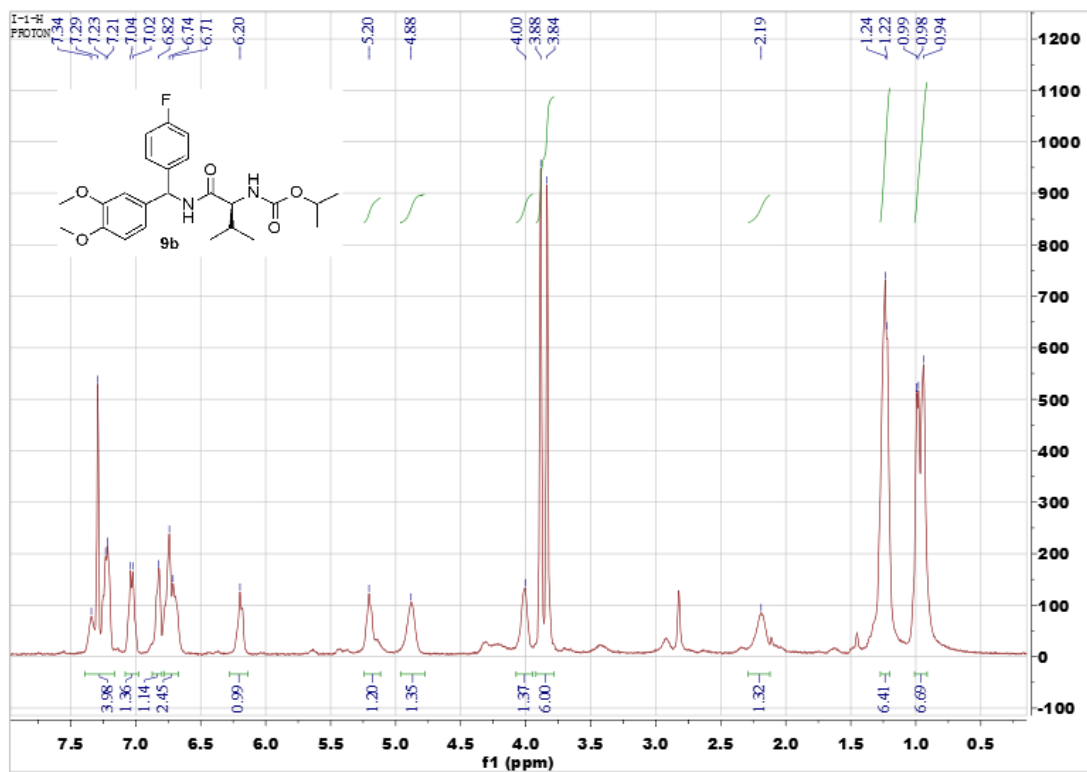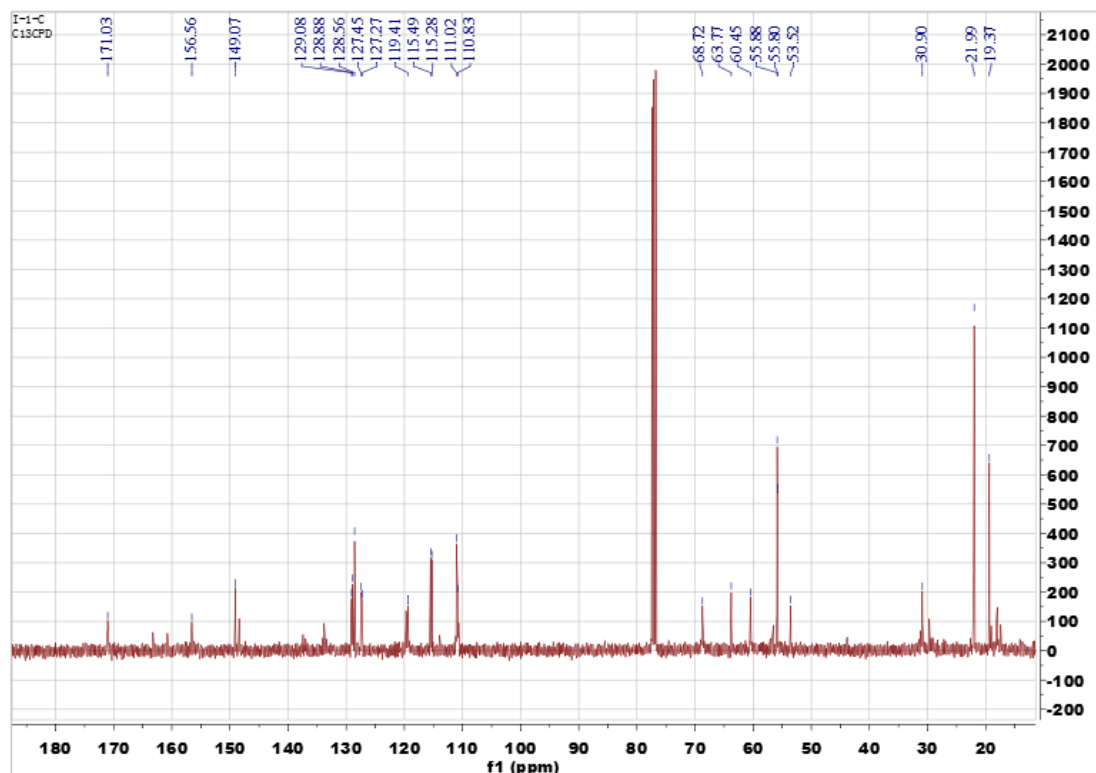

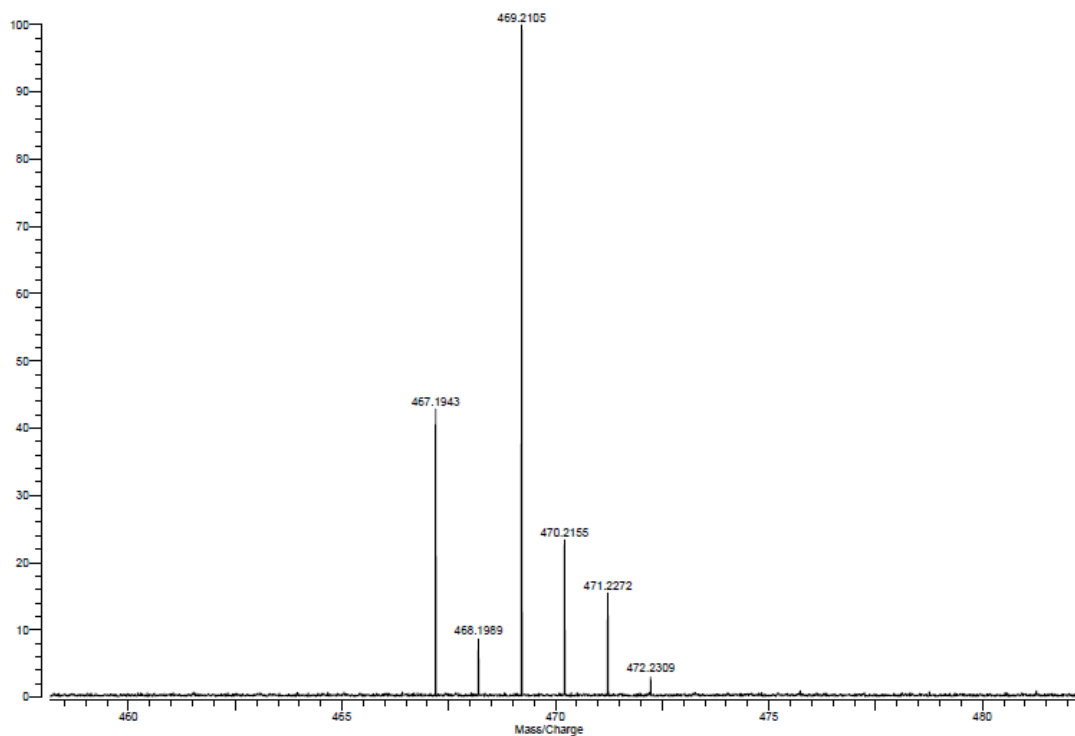

9c

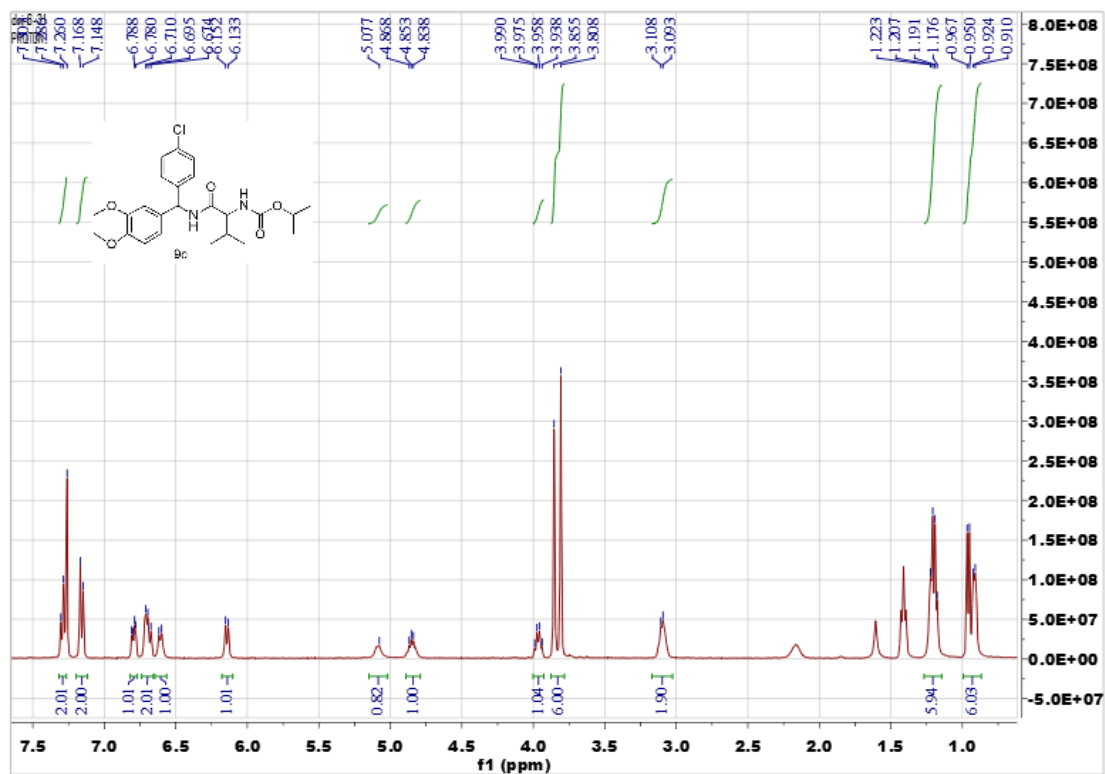

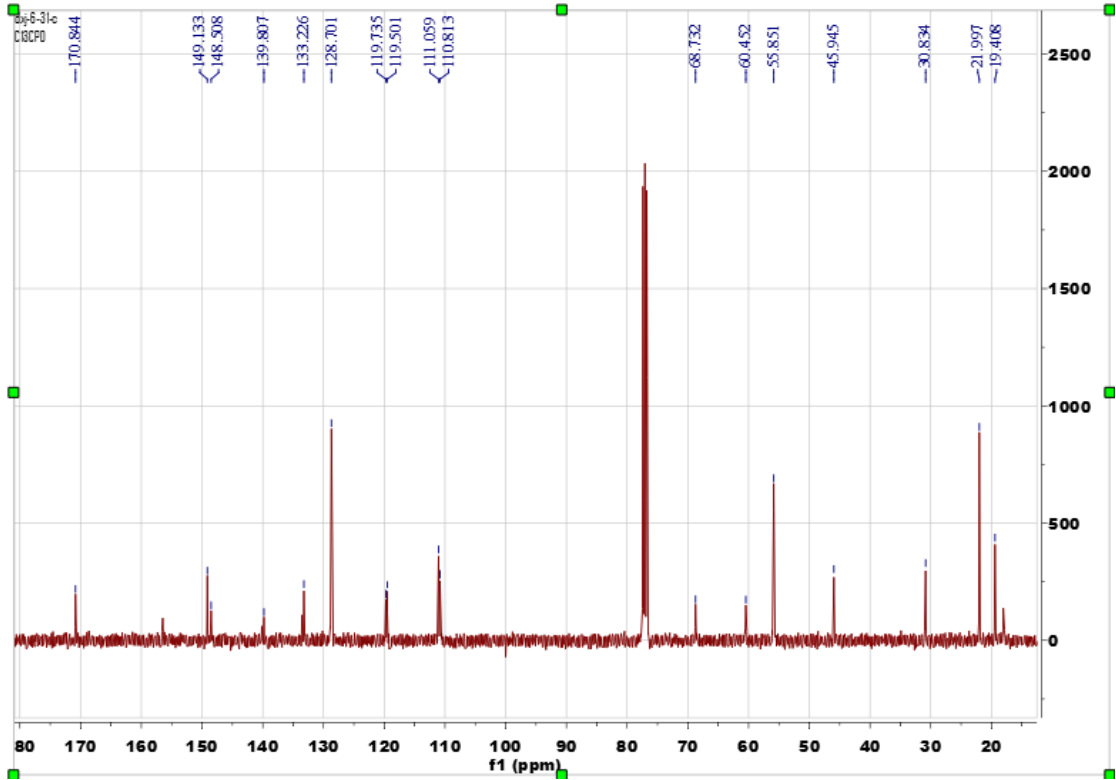

| Sample Name   | lc/ms | Position    | PI-A2     | Instrument Name | Instrument 1 | User Name              |                       |
|---------------|-------|-------------|-----------|-----------------|--------------|------------------------|-----------------------|
| Inj Vol       | 2     | InjPosition |           | SampleType      | Sample       | IRM Calibration Status | Some Ions Missed      |
| Data Filename | 1-3.d | ACQ Method  | chen-ms.m | Comment         |              | Acquired Time          | 9/23/2013 10:23:13 AM |

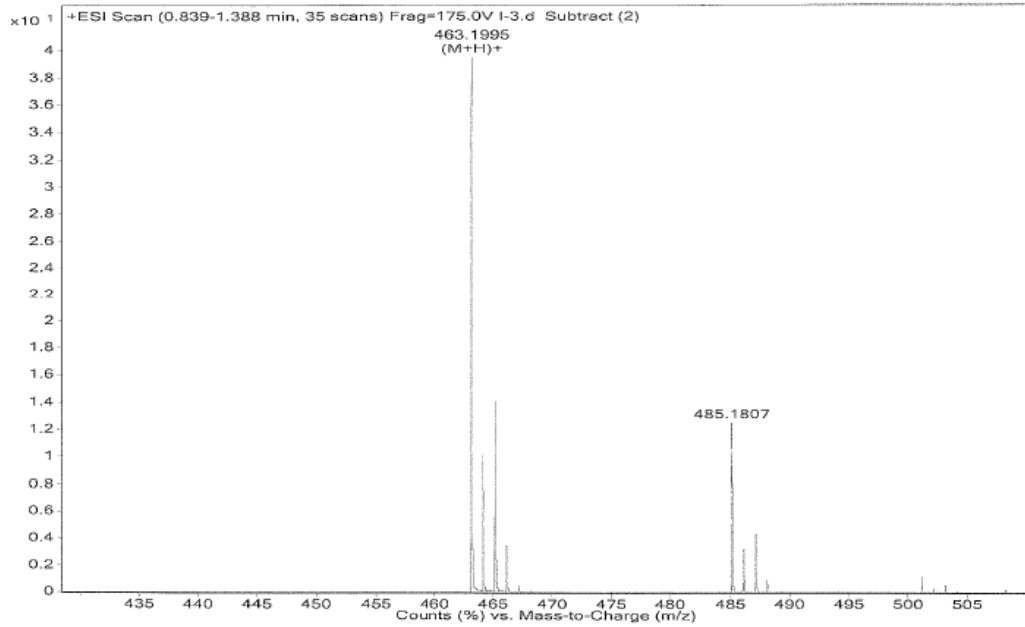

9d

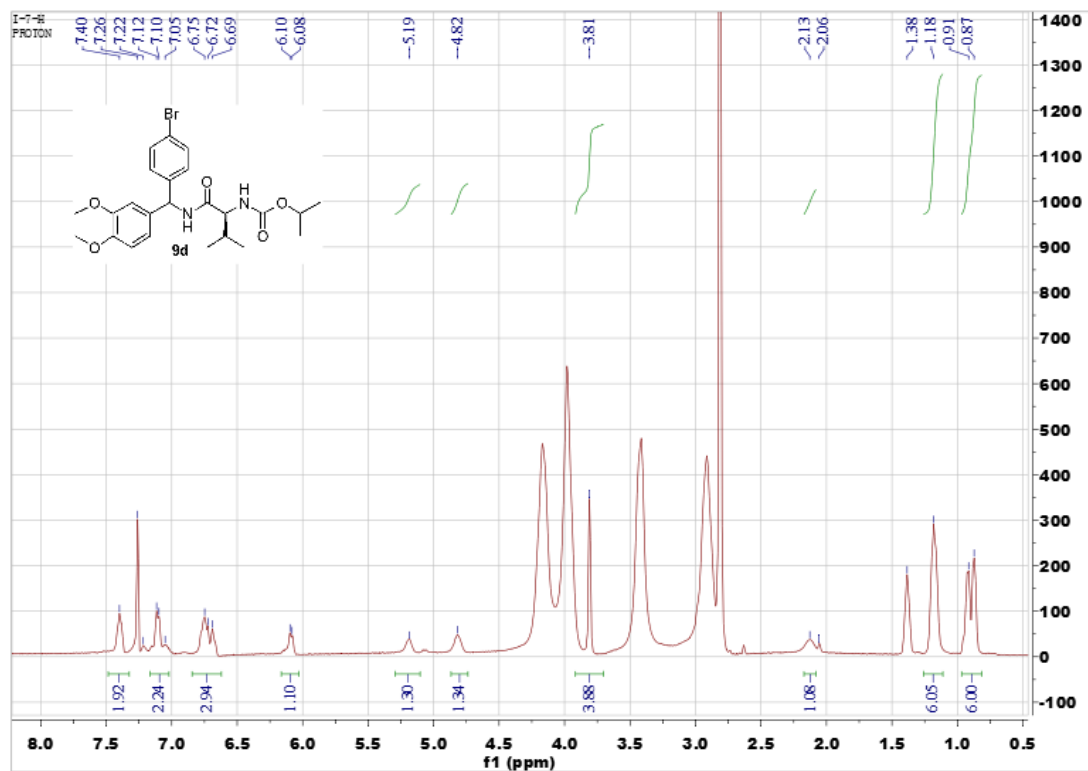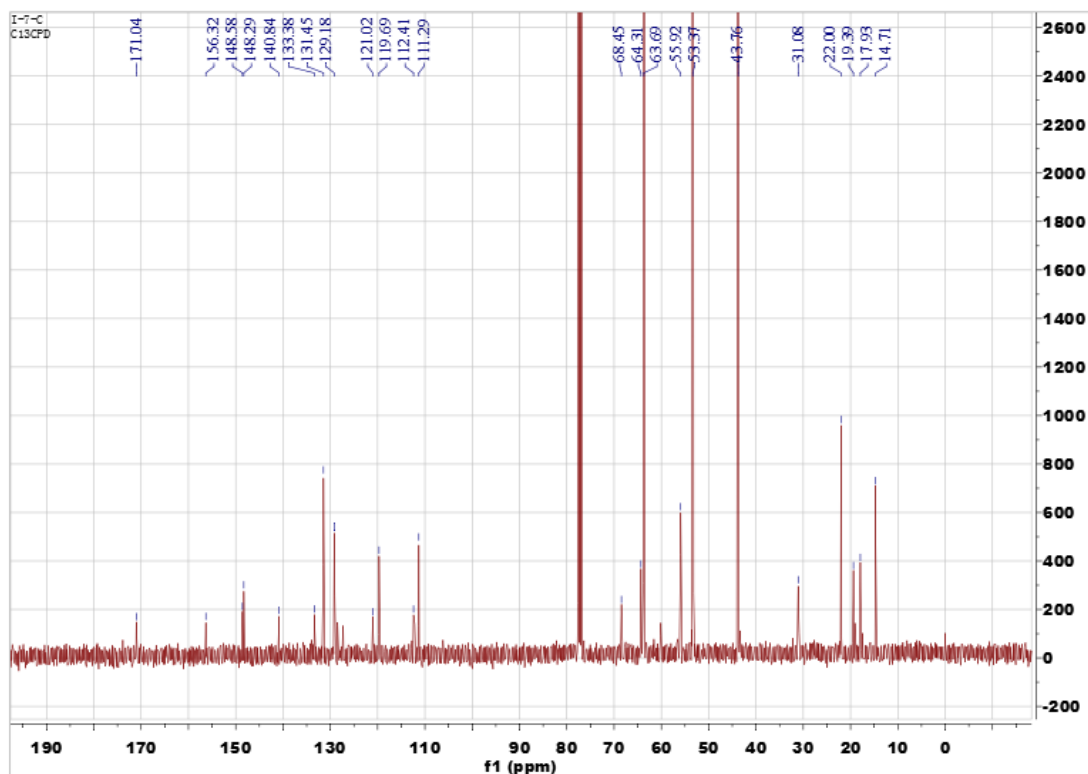

|               |        |             |            |                 |              |                        |                       |
|---------------|--------|-------------|------------|-----------------|--------------|------------------------|-----------------------|
| Sample Name   | lc/ms  | Position    | P1-A2      | Instrument Name | Instrument 1 | User Name              |                       |
| Inj Vol       | 2      | InjPosition |            | SampleType      | Sample       | IRM Calibration Status | Some Ions Missed      |
| Data Filename | 1-14.d | ACQ Method  | chen-rms.m | Comment         |              | Acquired Time          | 9/23/2013 11:44:54 AM |

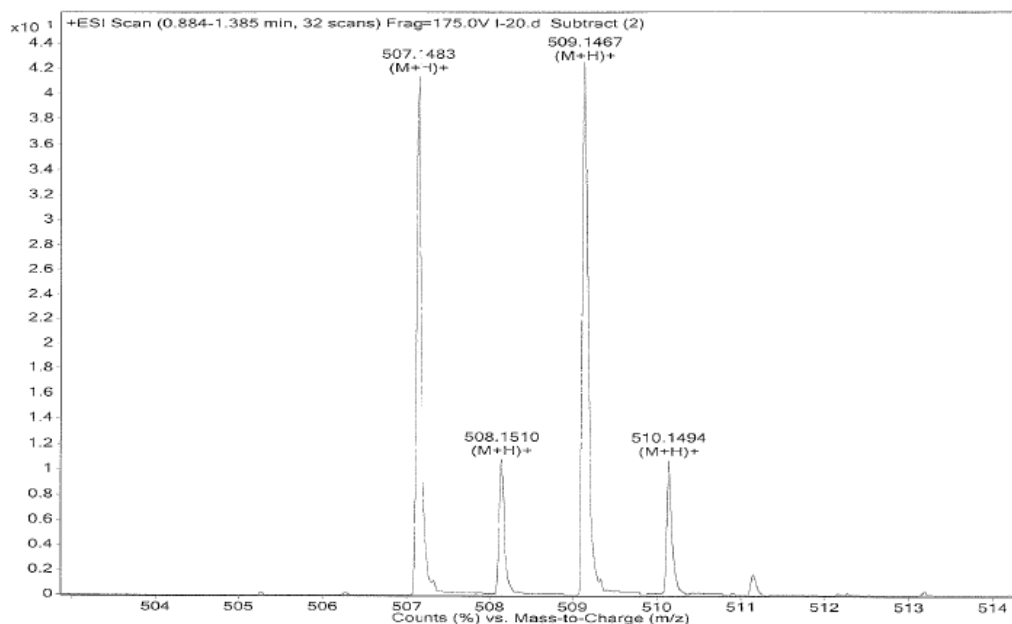

9e

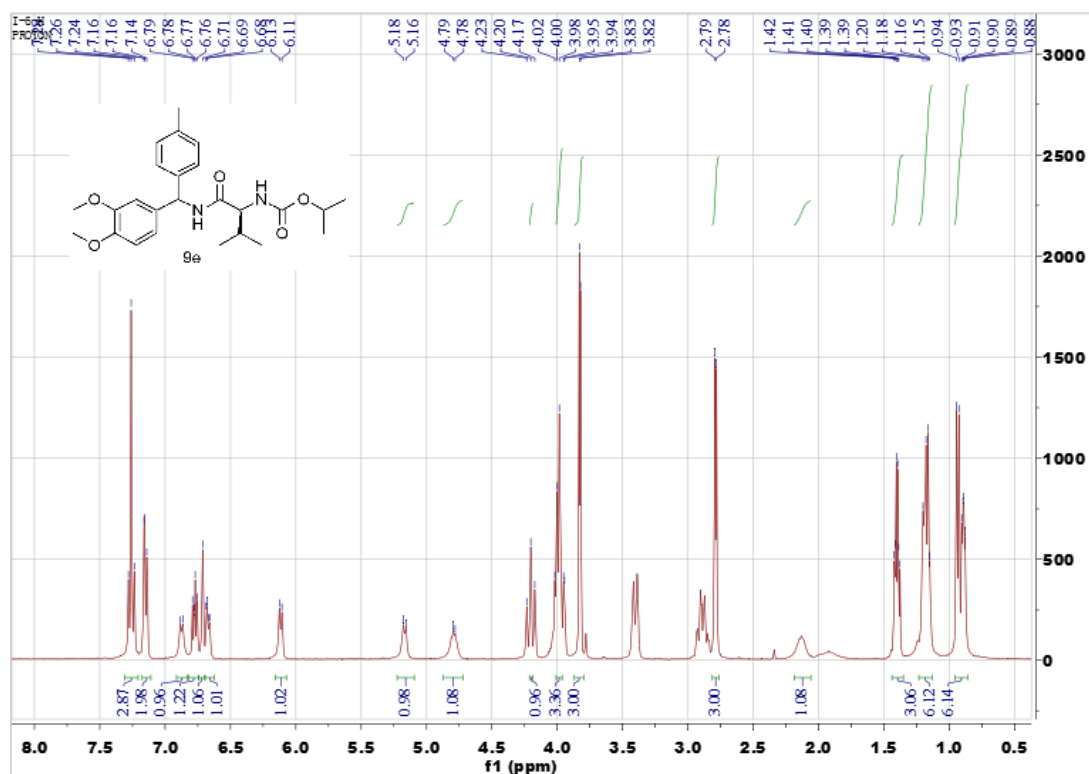

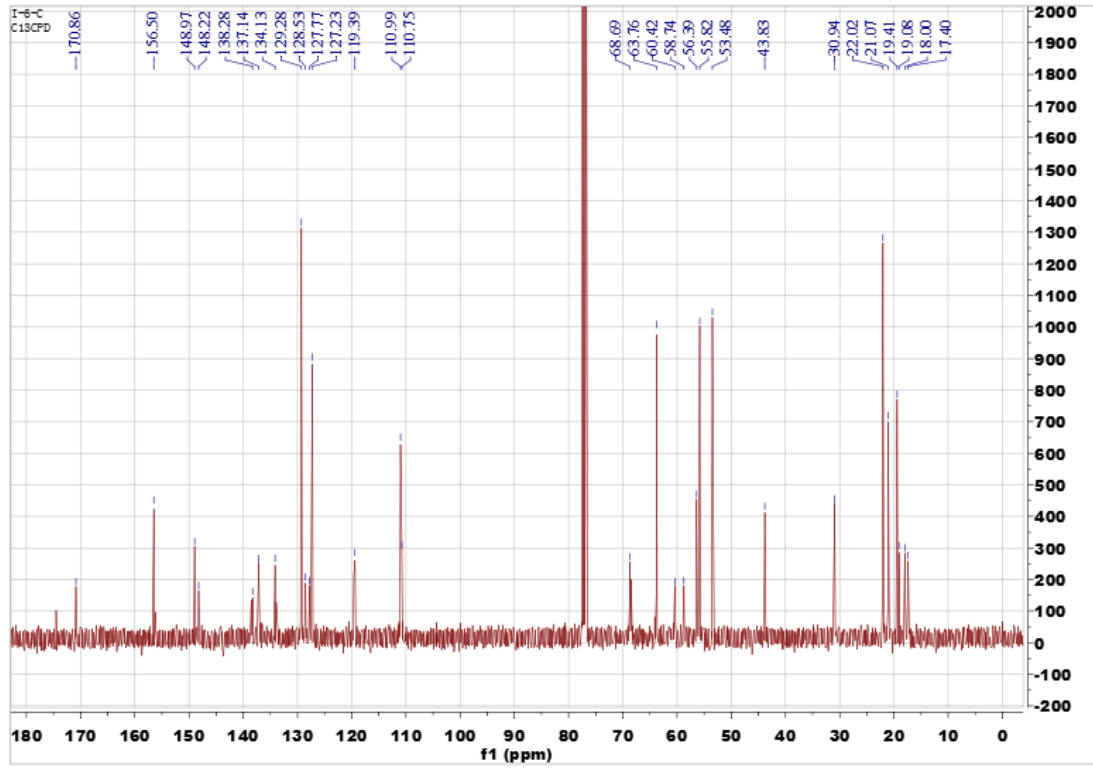

Varian ProMALDI  
File: LY-I-6\_MALDI.trans

Mode: Positive  
Scans: 1

Date: 14-DEC-2011  
Time: 09:20:56  
Scale: 11.0765

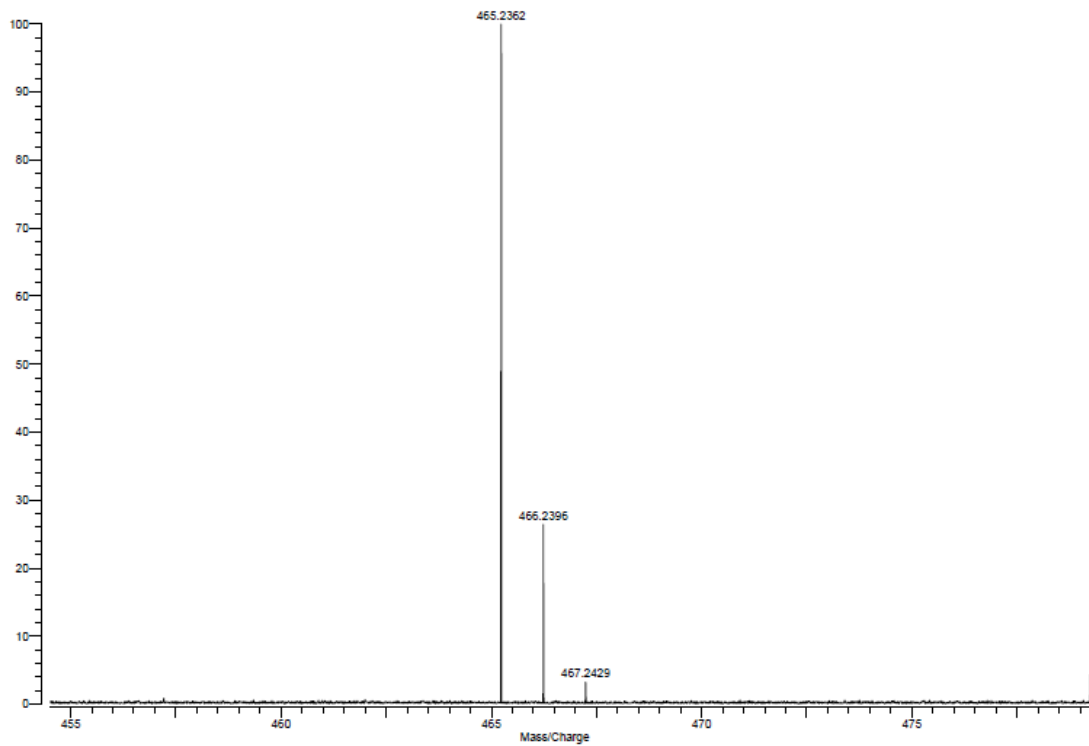

9f

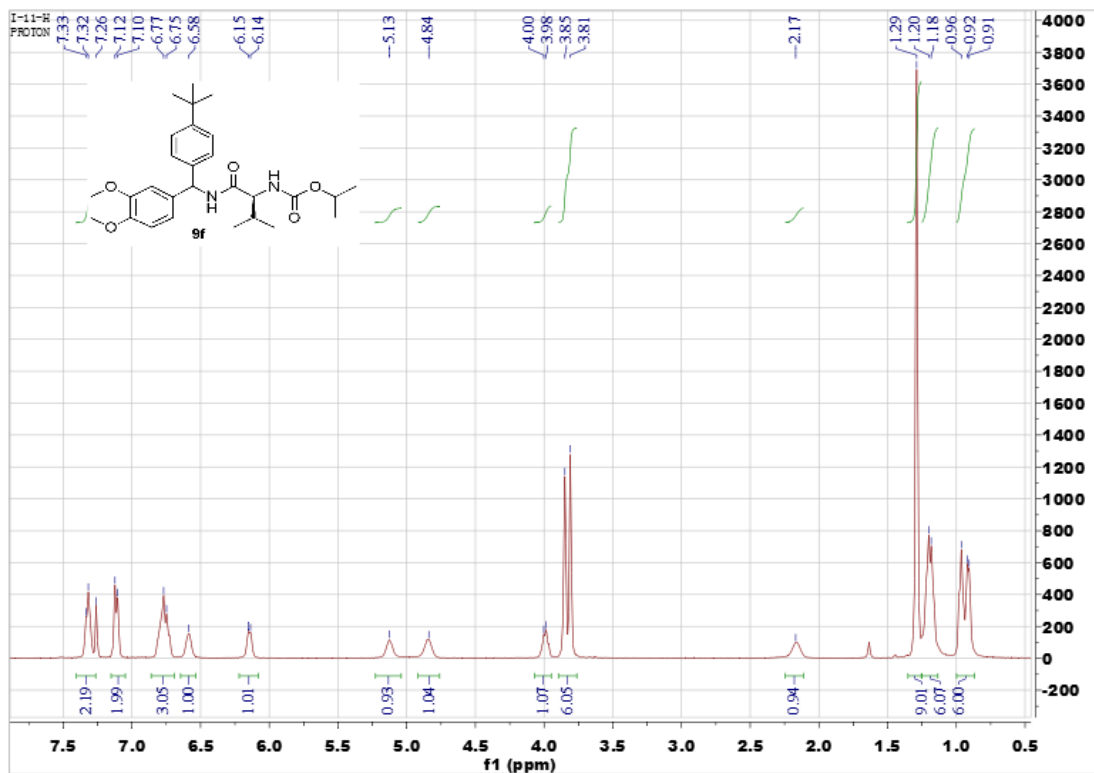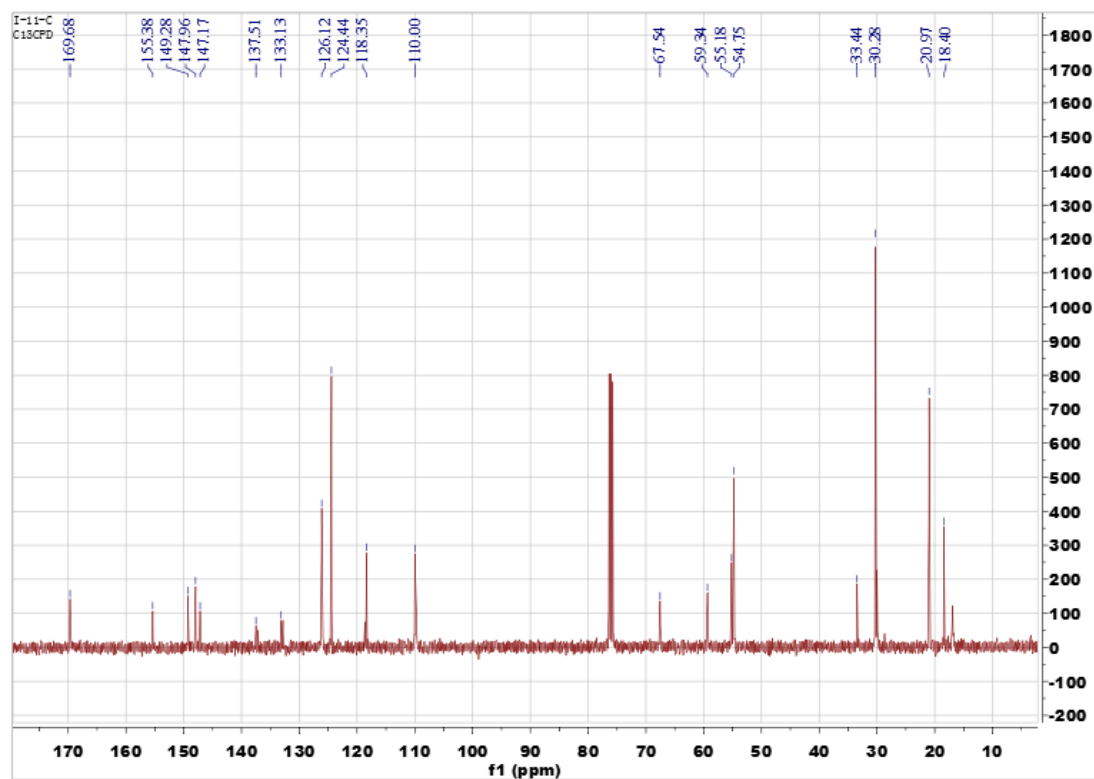



|               |        |             |           |                 |              |                        |                       |
|---------------|--------|-------------|-----------|-----------------|--------------|------------------------|-----------------------|
| Sample Name   | lc/mrs | Position    | P1-A4     | Instrument Name | Instrument 1 | User Name              |                       |
| Inj Vol       | 2      | InjPosition |           | SampleType      | Sample       | IRM Calibration Status | Some Ions Missed      |
| Data Filename | 1-6.d  | ACQ Method  | chen-ms.m | Comment         |              | Acquired Time          | 9/23/2013 10:30:44 AM |

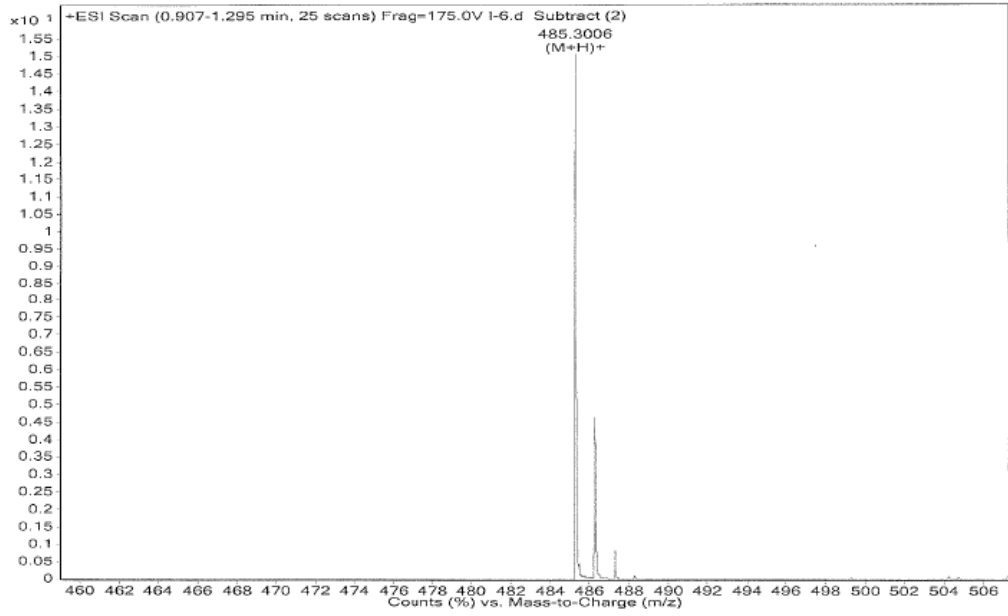

9g

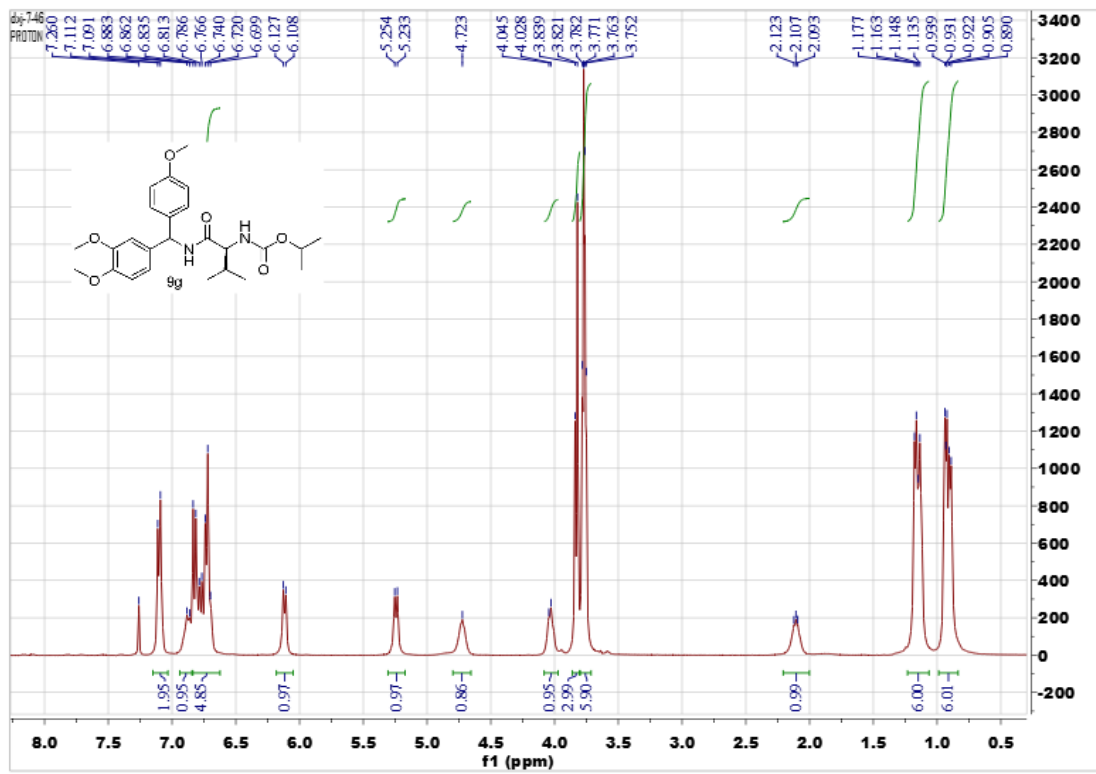

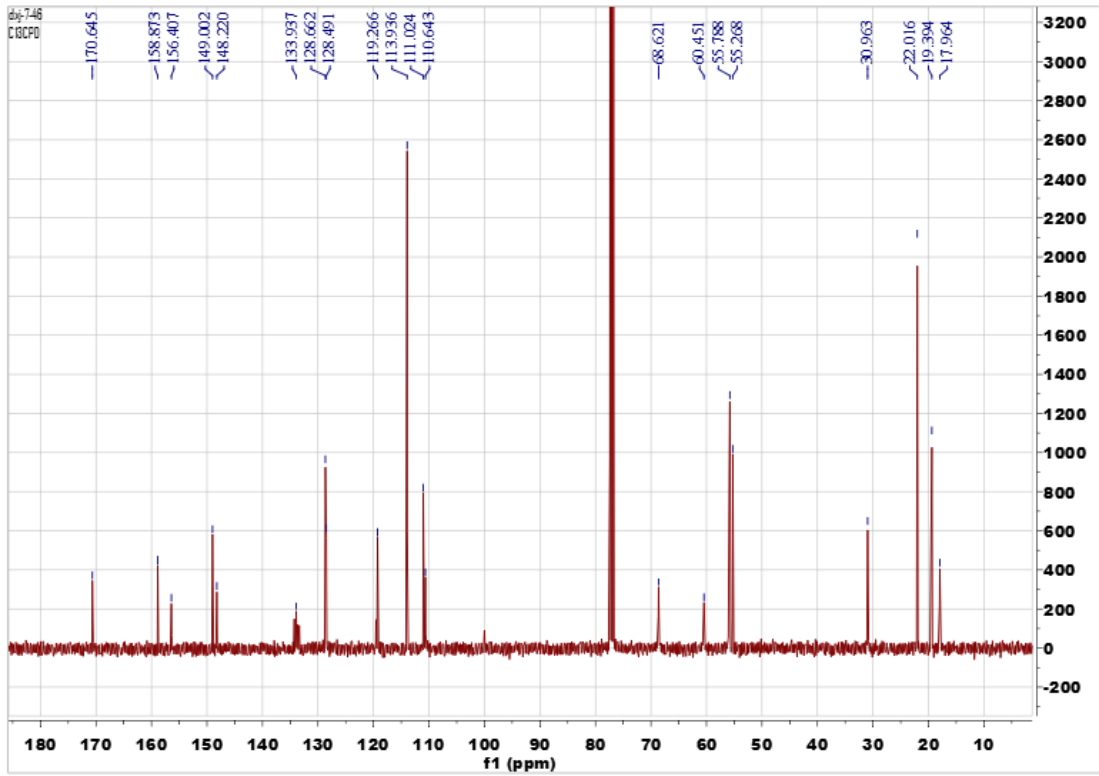

| Sample Name   | lc/ms | Position    | PI-A5     | Instrument Name | Instrument 1 | User Name              | IRM Calibration Status | Some Ions Missed      |
|---------------|-------|-------------|-----------|-----------------|--------------|------------------------|------------------------|-----------------------|
| Inj Vol       | 2     | InjPosition |           | SampleType      | Sample       | IRM Calibration Status |                        | 9/23/2013 10:34:32 AM |
| Data Filename | I-7.d | ACQ Method  | chem-ms.m | Comment         |              | Acquired Time          |                        |                       |

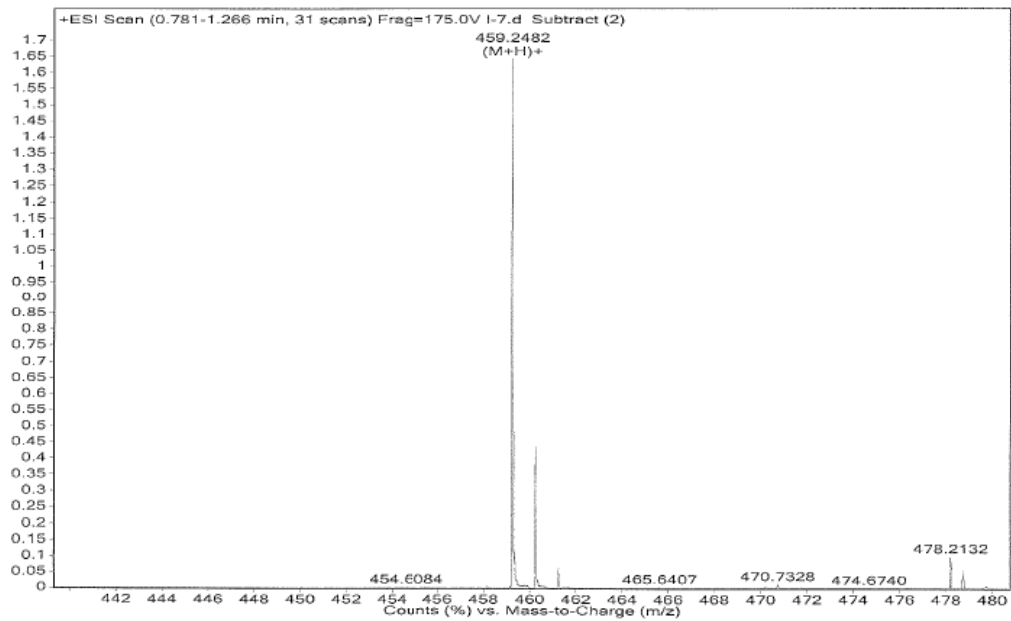

9h

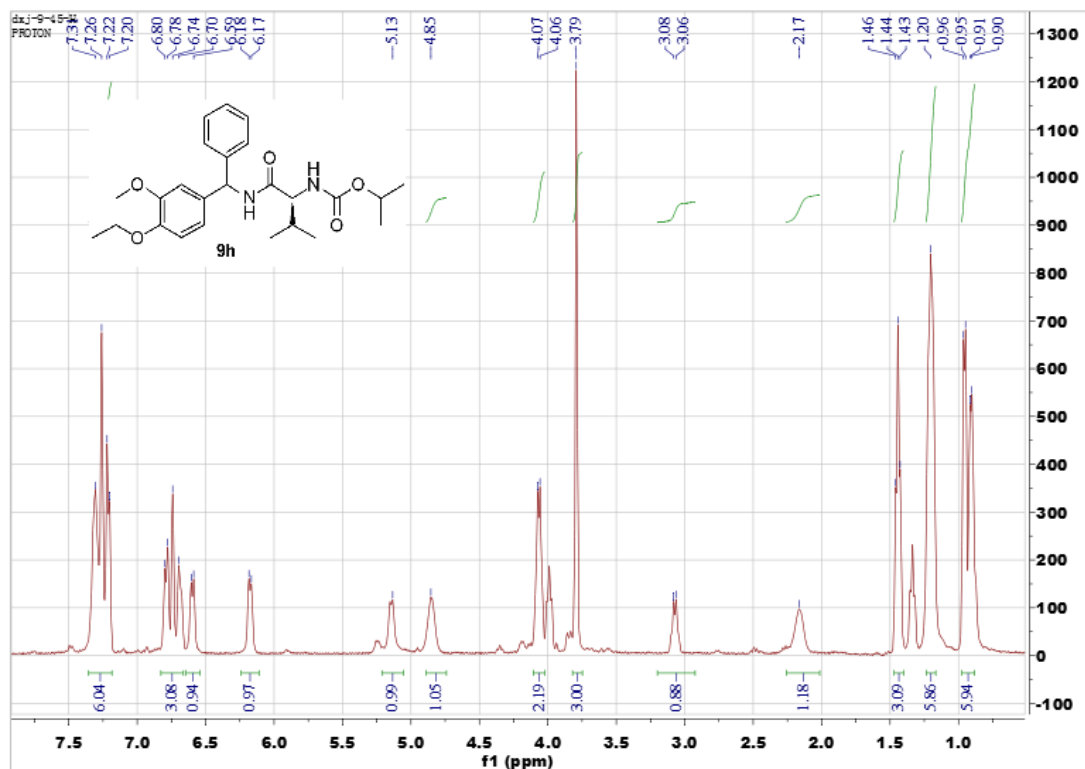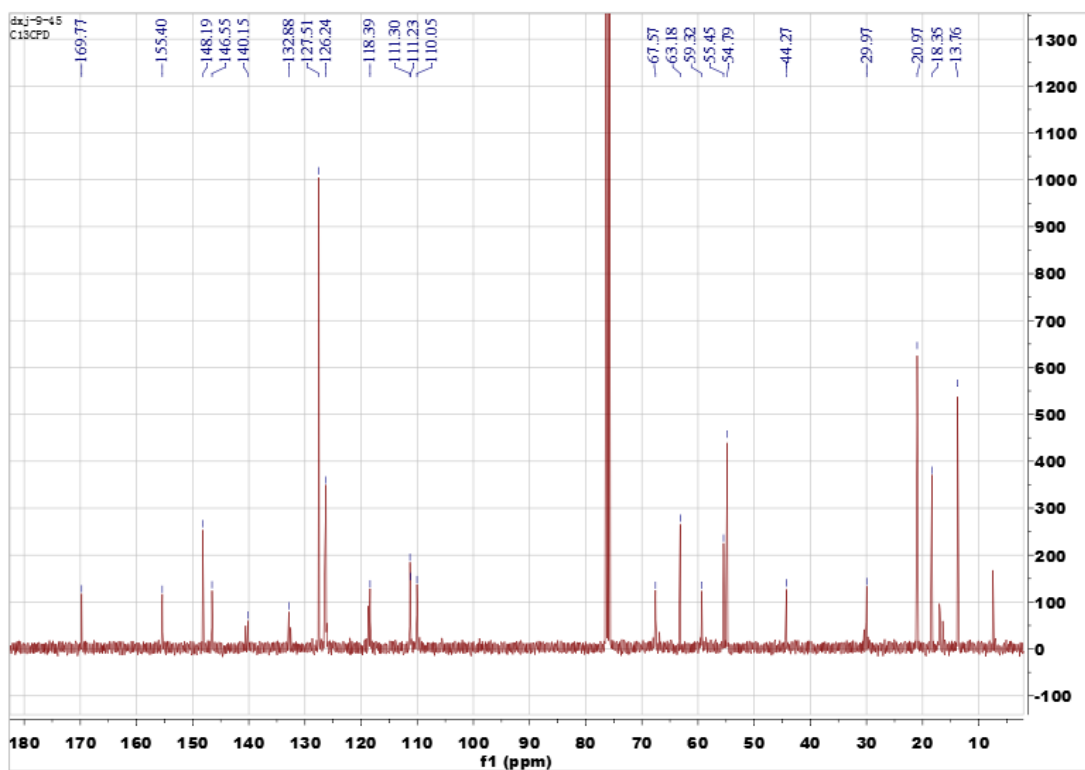

|               |       |              |           |                 |              |                        |                       |
|---------------|-------|--------------|-----------|-----------------|--------------|------------------------|-----------------------|
| Sample Name   | lc/ms | Position     | P1-A6     | Instrument Name | Instrument 1 | User Name              |                       |
| Inj Vol       | 2     | Inj Position |           | Sample Type     | Sample       | IRM Calibration Status | Some Ions Missed      |
| Data Filename | l-8.d | ACQ Method   | chen-ms.m | Comment         |              | Acquired Time          | 9/23/2013 10:38:19 AM |

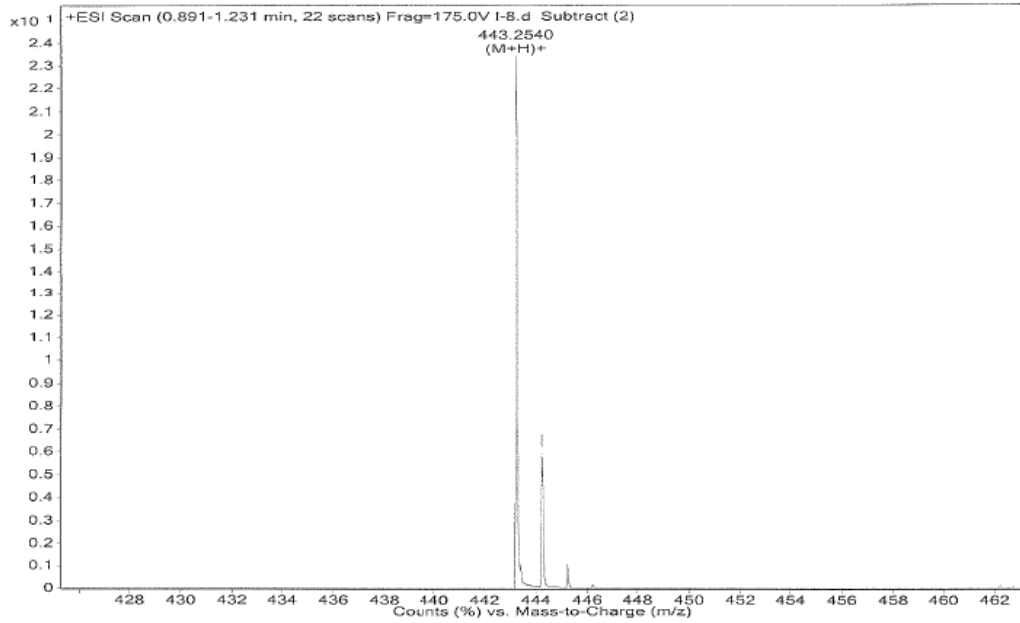

9i

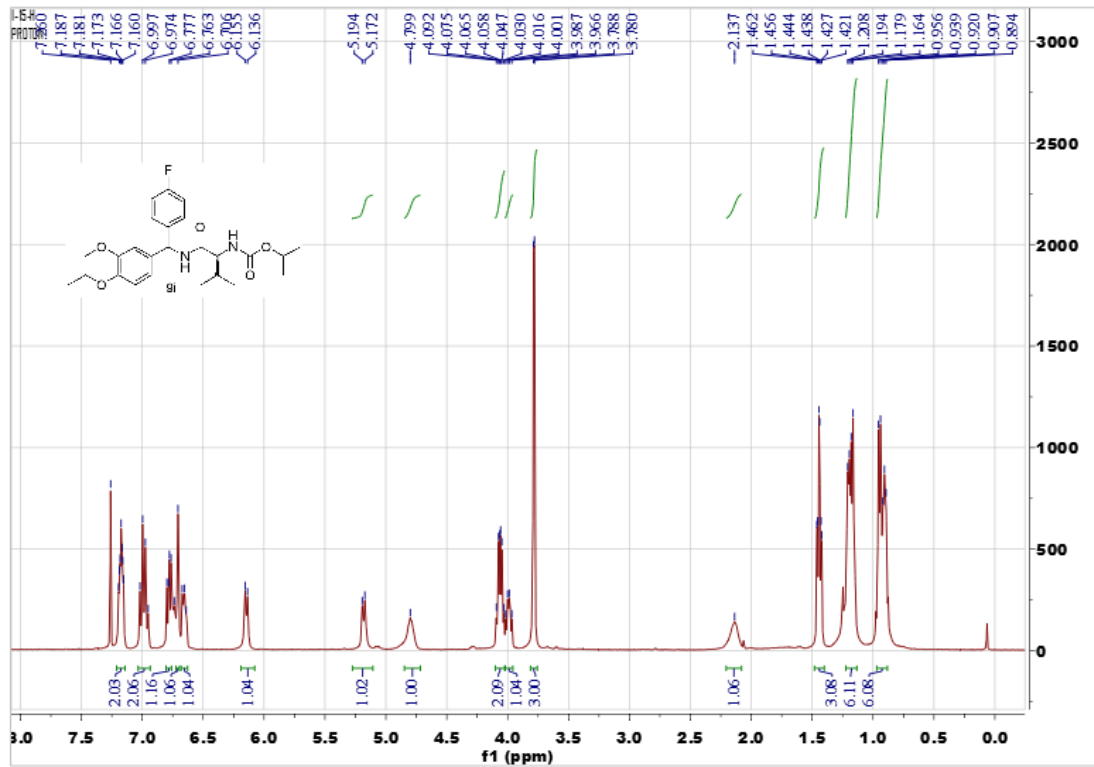

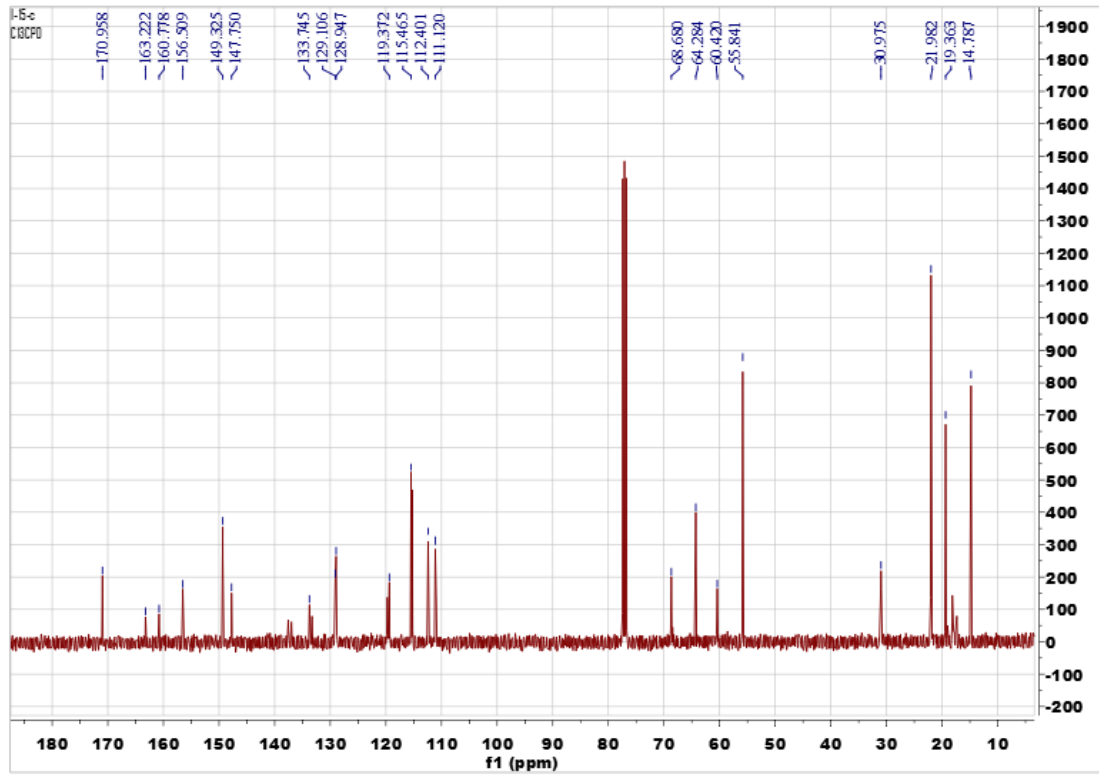

|               |       |             |           |                 |              |                        |                       |
|---------------|-------|-------------|-----------|-----------------|--------------|------------------------|-----------------------|
| Sample Name   | lc/ms | Position    | P1-A7     | Instrument Name | Instrument 1 | User Name              |                       |
| Inj Vol       | 2     | InjPosition |           | SampleType      | Sample       | IRM Calibration Status | Some Ions Missed      |
| Data Filename | I-9.d | ACQ Method  | chen-ms.m | Comment         |              | Acquired Time          | 9/23/2013 10:42:04 AM |

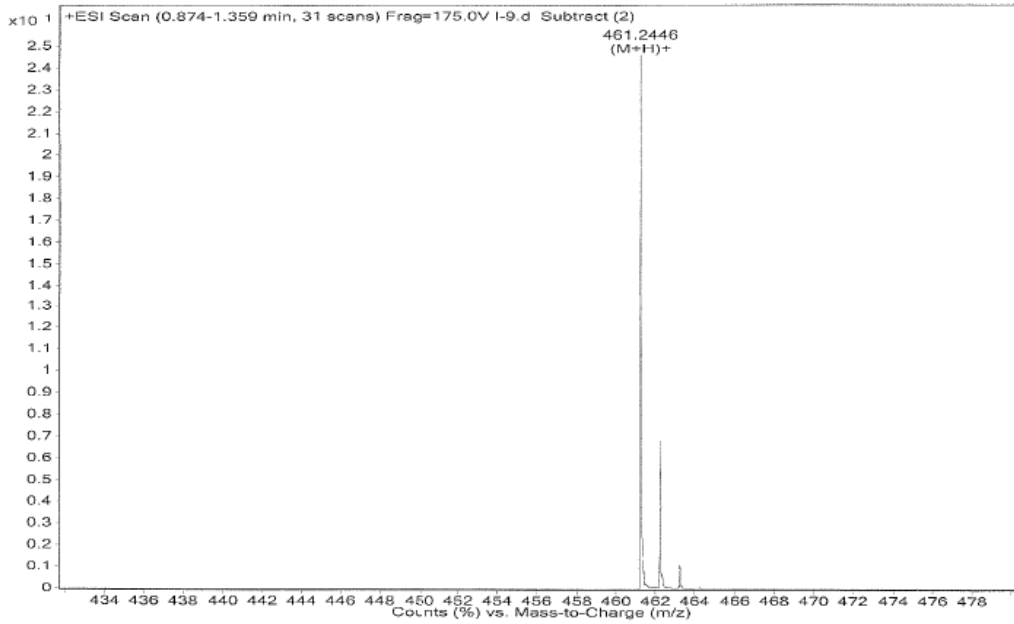

9j

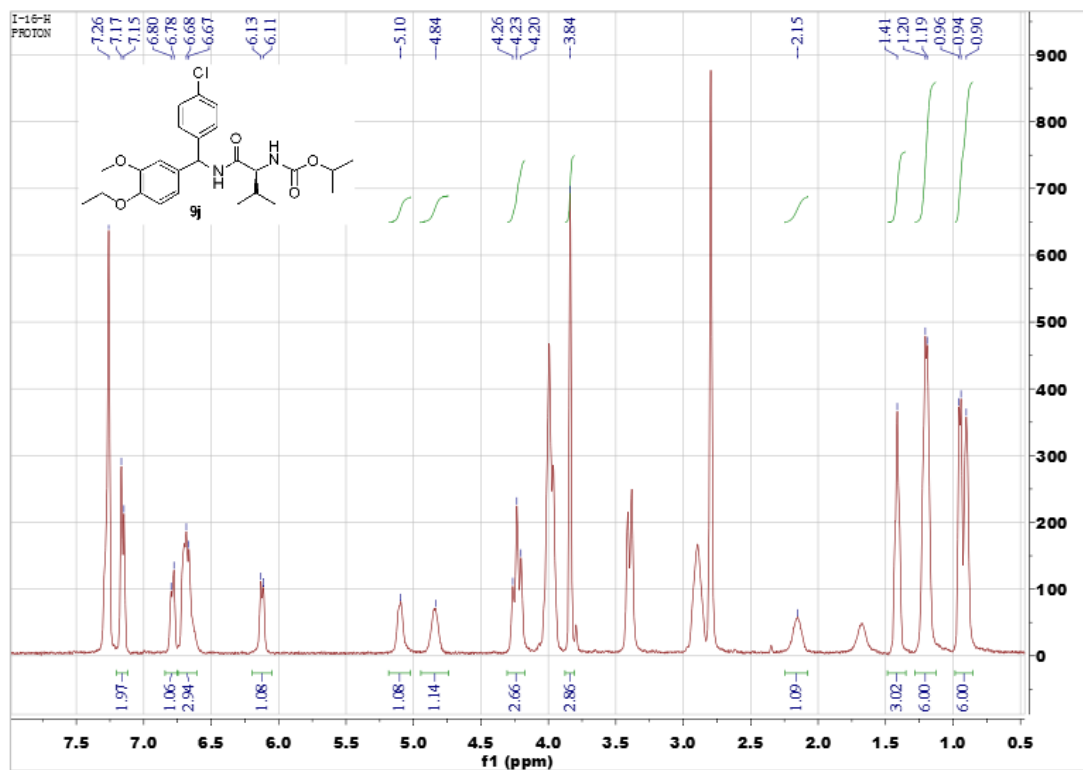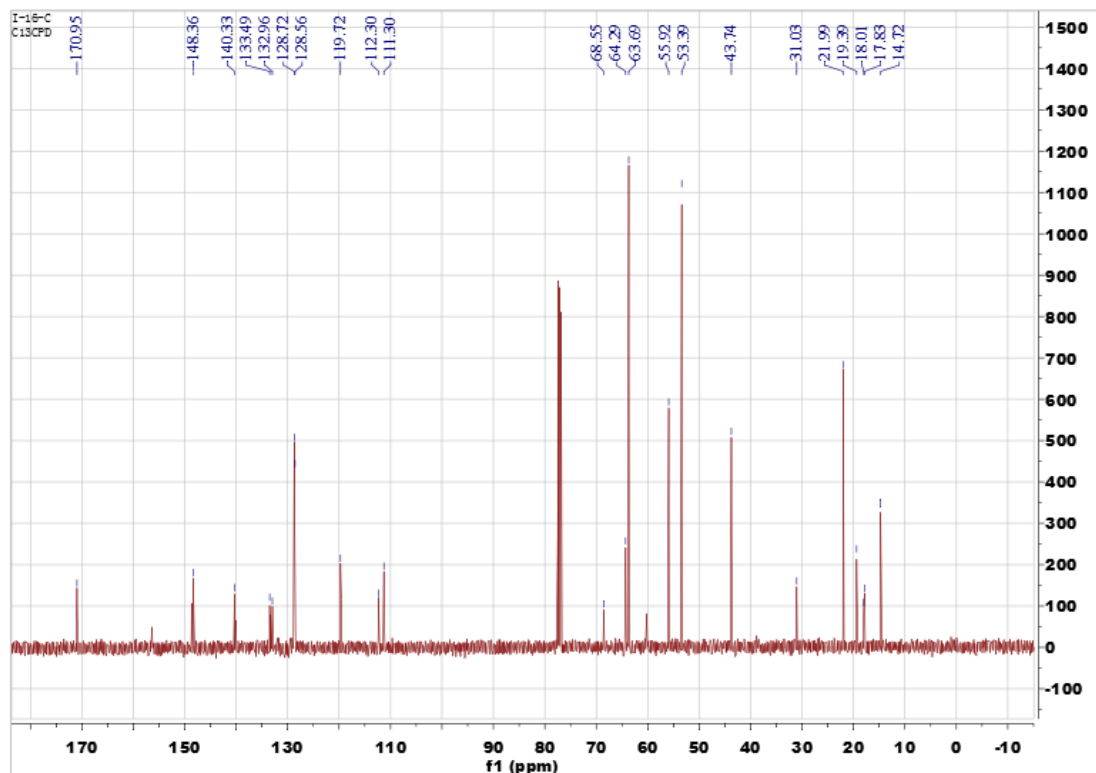

| Sample Name   | Ic/irs | Position    | PI-A1      | Instrument Name | Instrument 1 | User Name              |                       |
|---------------|--------|-------------|------------|-----------------|--------------|------------------------|-----------------------|
| Inj Vol       | 2      | InjPosition |            | SampleType      | Sample       | IRM Calibration Status | Some Ions Missed      |
| Data Filename | 1-10.d | ACQ Method  | chen-irs.m | Comment         |              | Acquired Time          | 9/23/2013 11:13:24 AM |

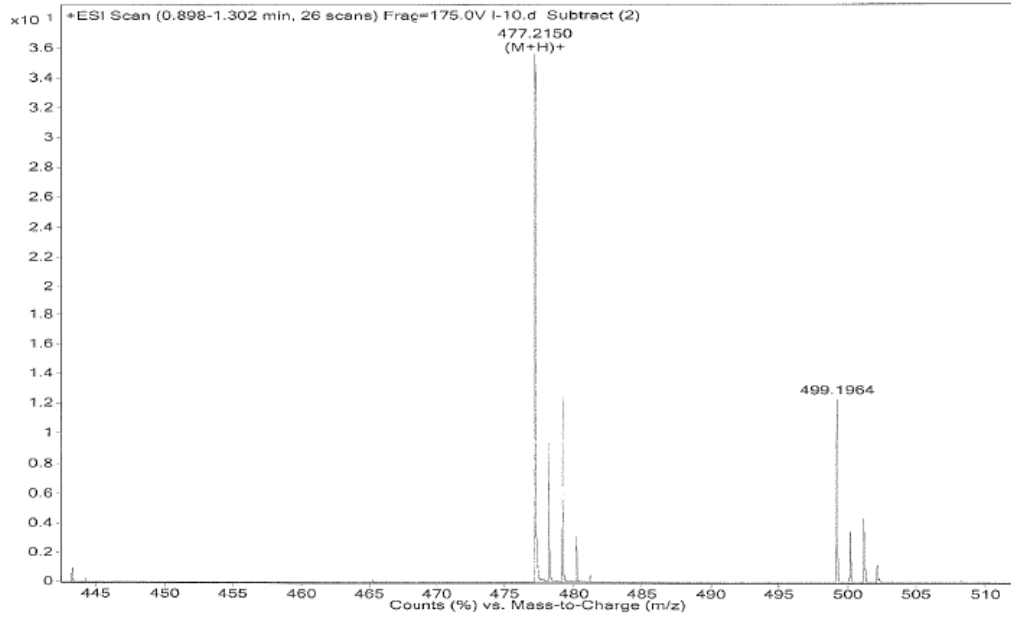

9k

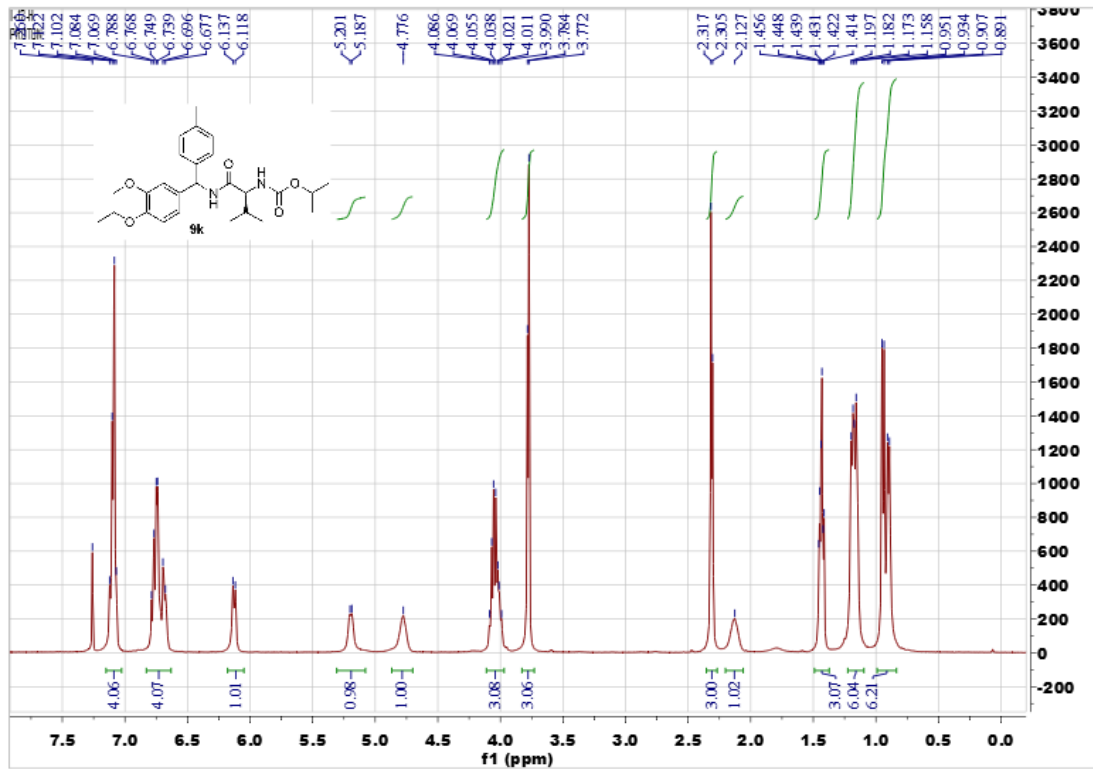

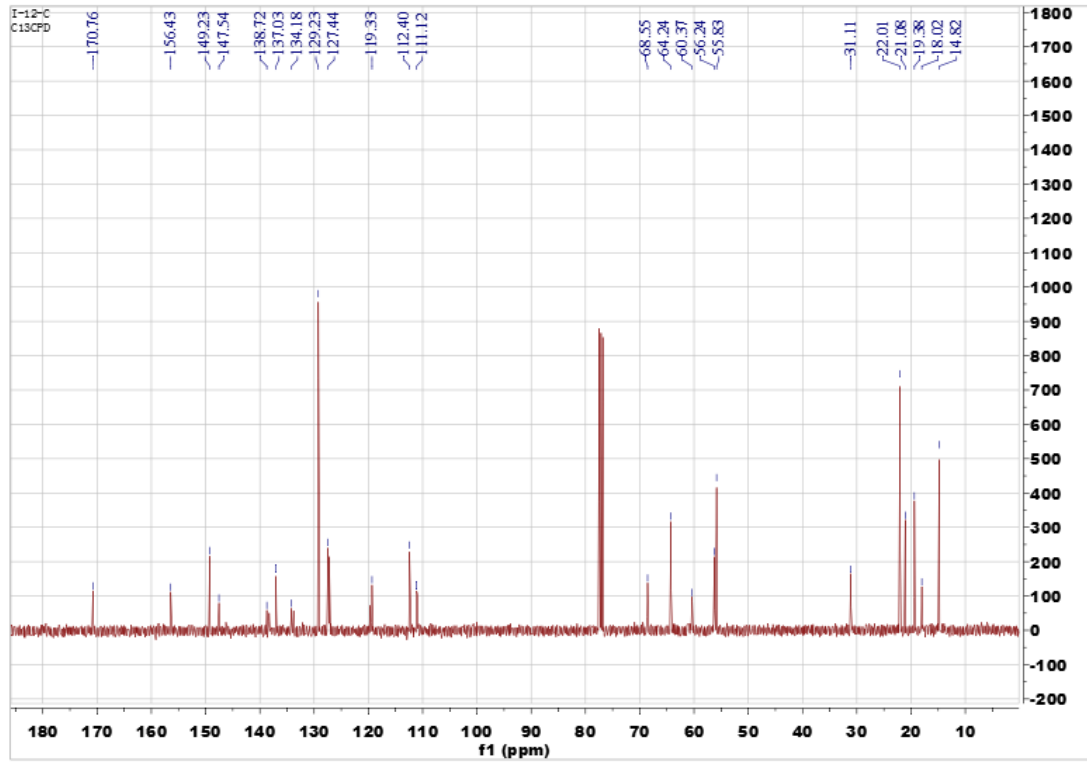

| Sample Name   | lc/ms  | Position    | PI-A2     | Instrument Name | Instrument 1 | User Name              |
|---------------|--------|-------------|-----------|-----------------|--------------|------------------------|
| Inj Vol       | 2      | InjPosition |           | SampleType      | Sample       | IRM Calibration Status |
| Data Filename | I-11.d | ACQ Method  | chen-ms.m | Comment         |              | Acquired Time          |

Some Ions Missed  
9/23/2013 11:17:10 AM

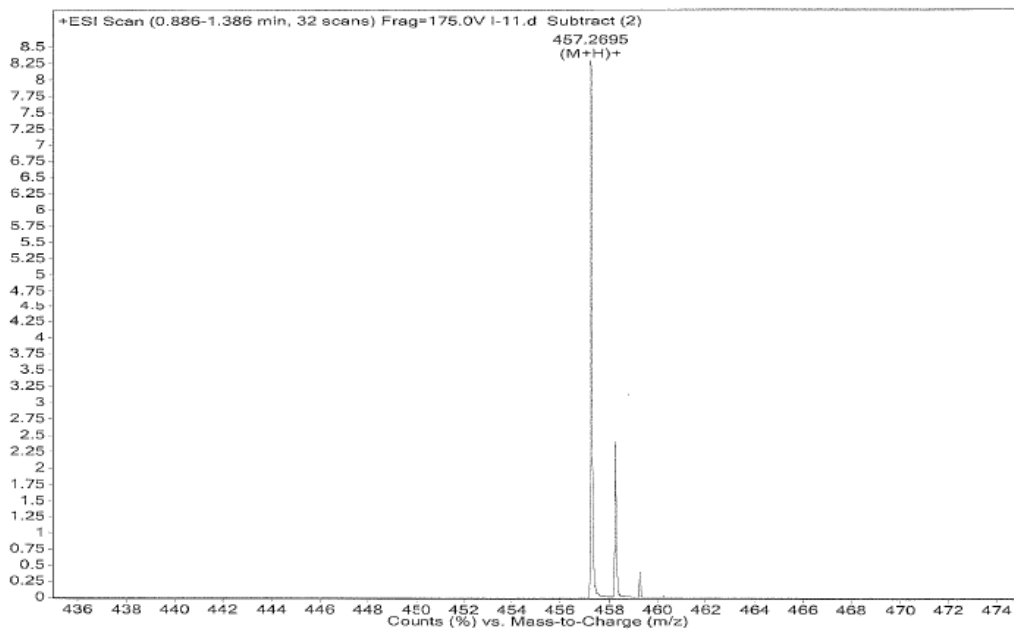



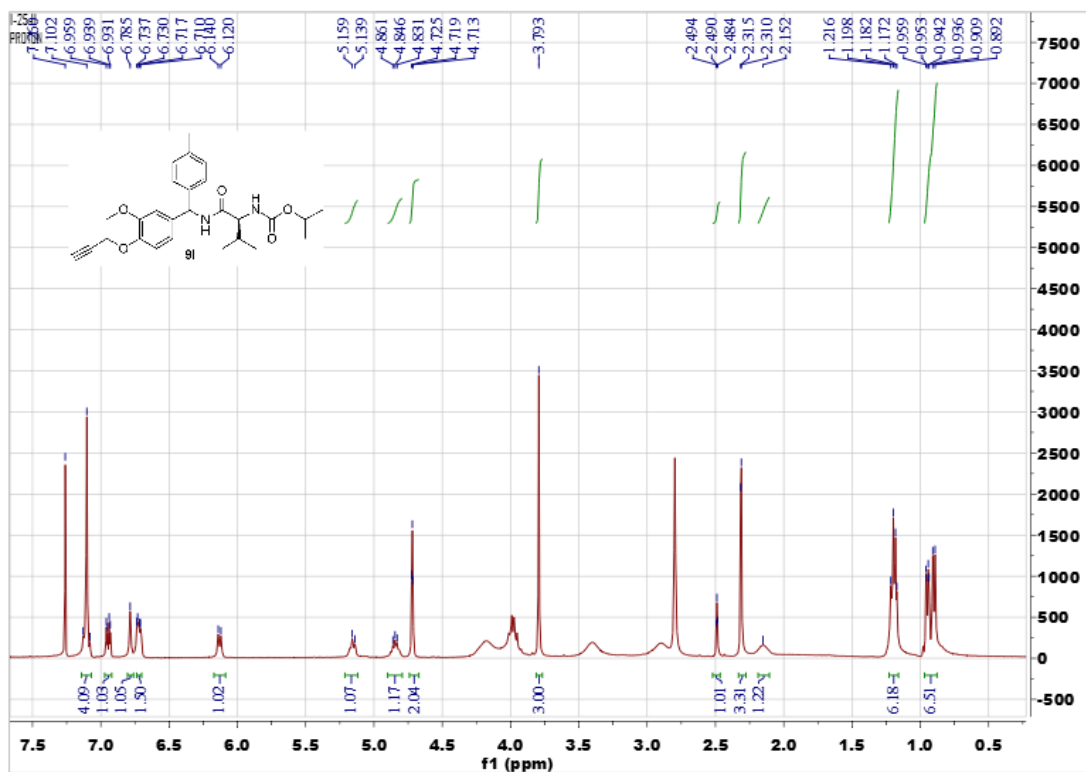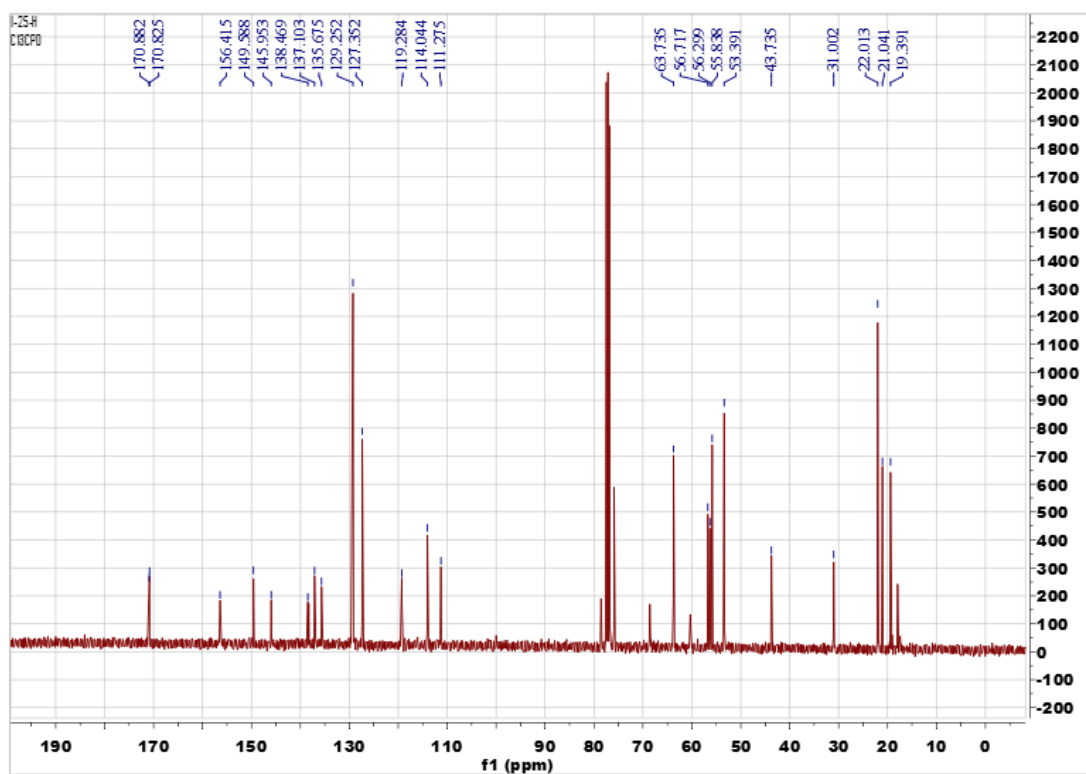

|               |        |             |           |                 |              |                        |                       |
|---------------|--------|-------------|-----------|-----------------|--------------|------------------------|-----------------------|
| Sample Name   | lc/ms  | Position    | P1-A3     | Instrument Name | Instrument 1 | User Name              |                       |
| Inj Vol       | 2      | InjPosition |           | SampleType      | Sample       | IRM Calibration Status | Some Ions Missed      |
| Data Filename | I-12.d | ACQ Method  | chen-ms.m | Comment         |              | Acquired Time          | 9/23/2013 11:20:56 AM |

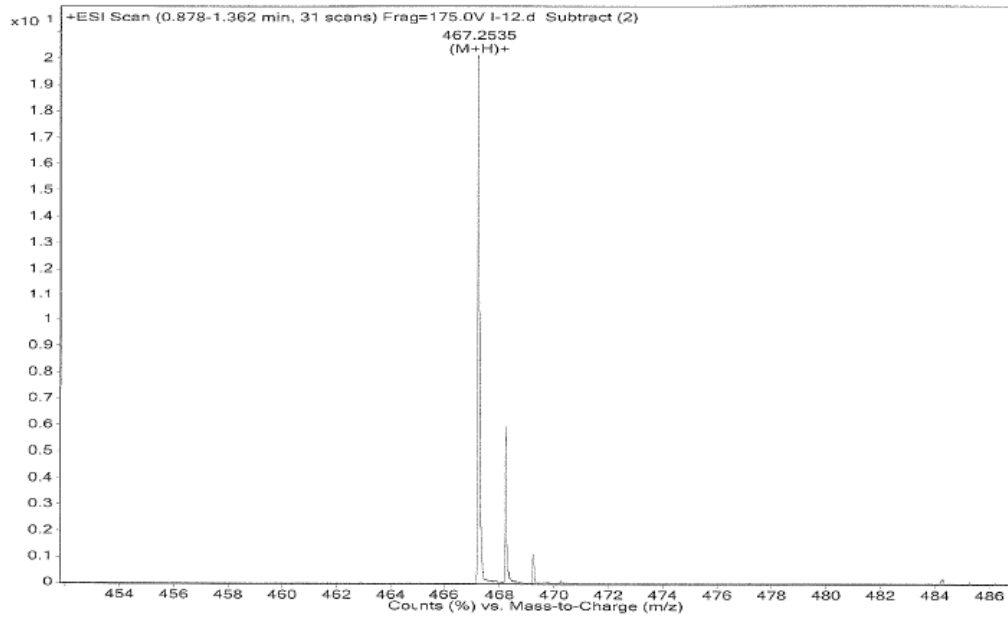

9m

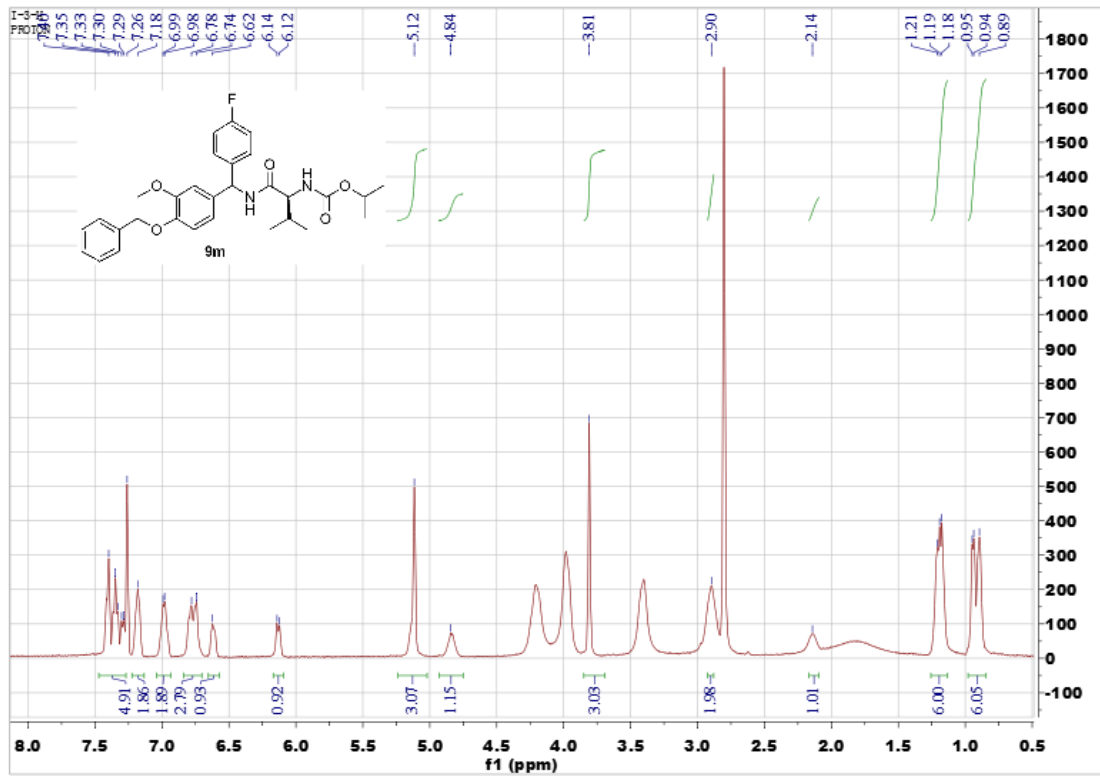

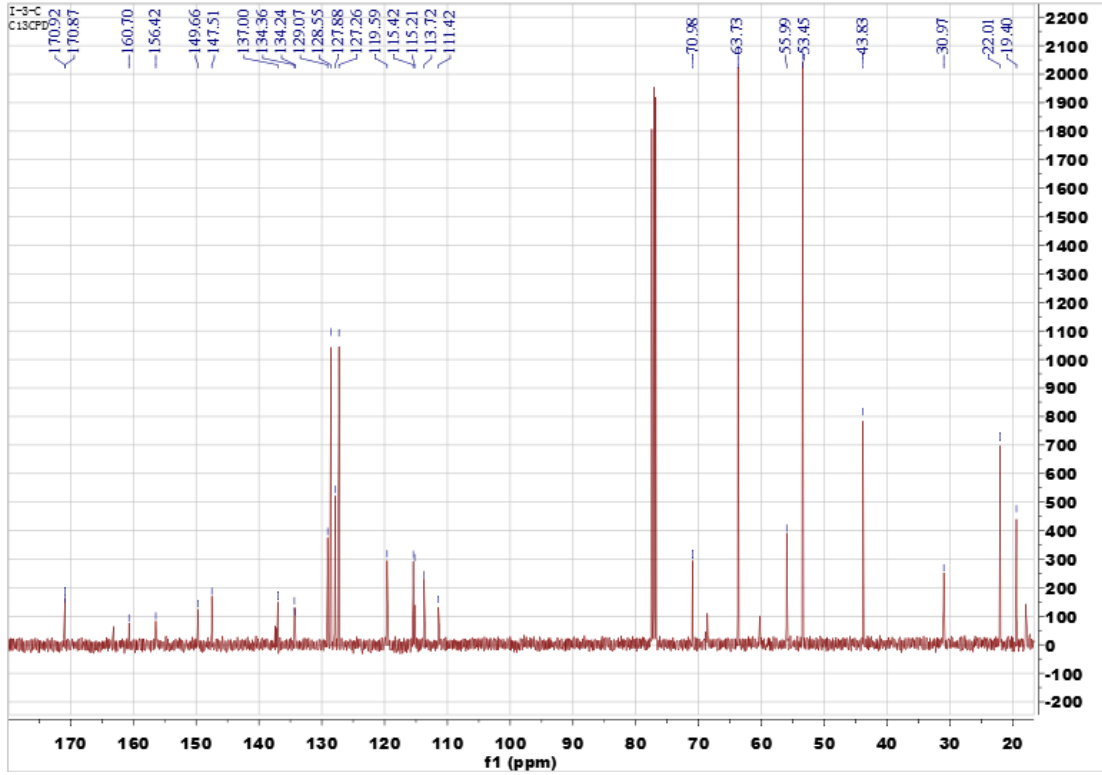

Varian ProMALDI  
File: LY-I-3\_MALDI.trans

Mode: Positive  
Scans: 1  
Date: 14-DEC-2011  
Time: 09:19:43  
Scale: 3.7012

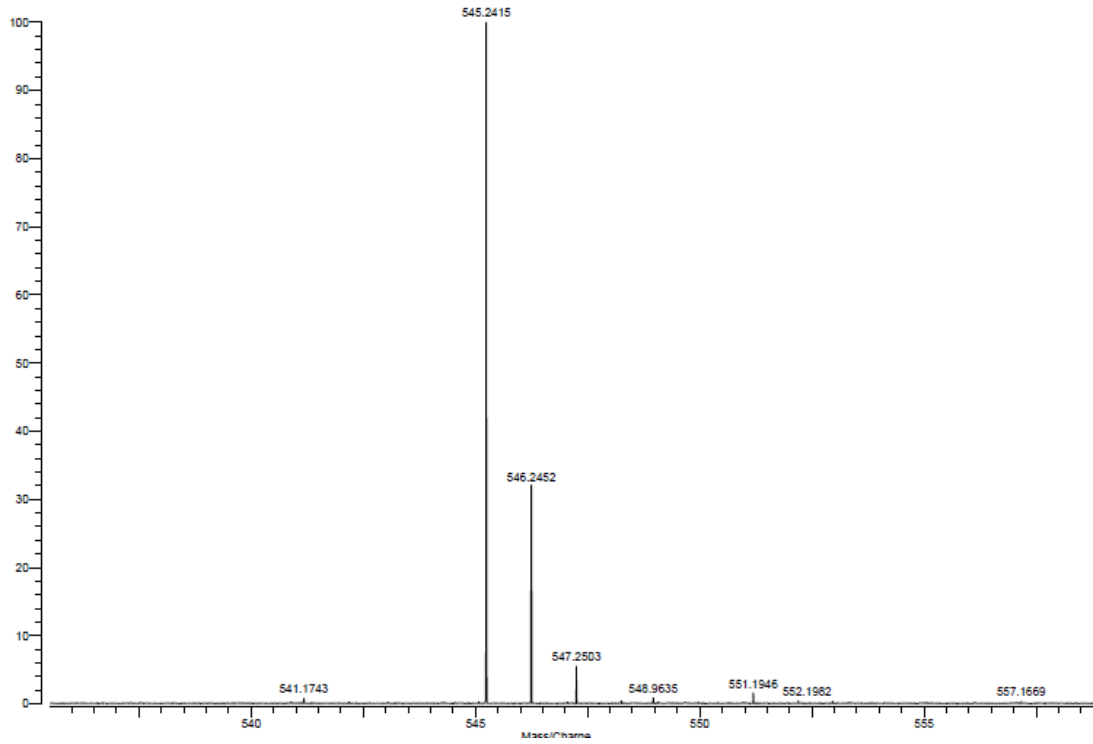

9n

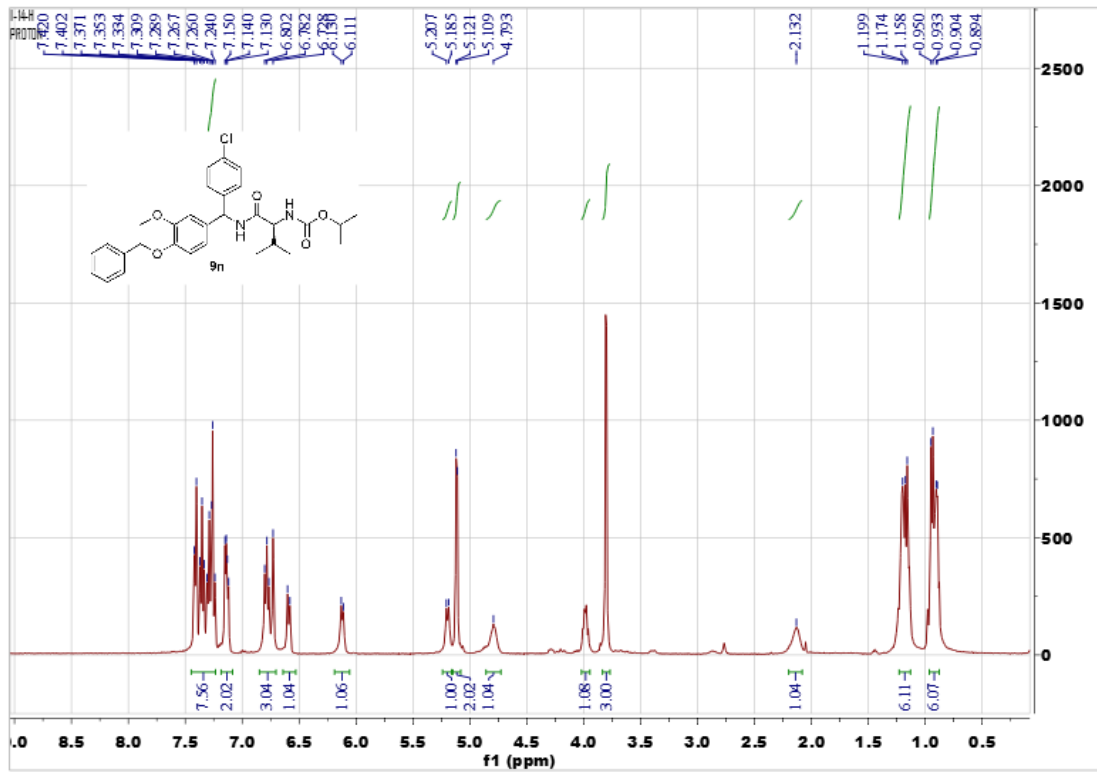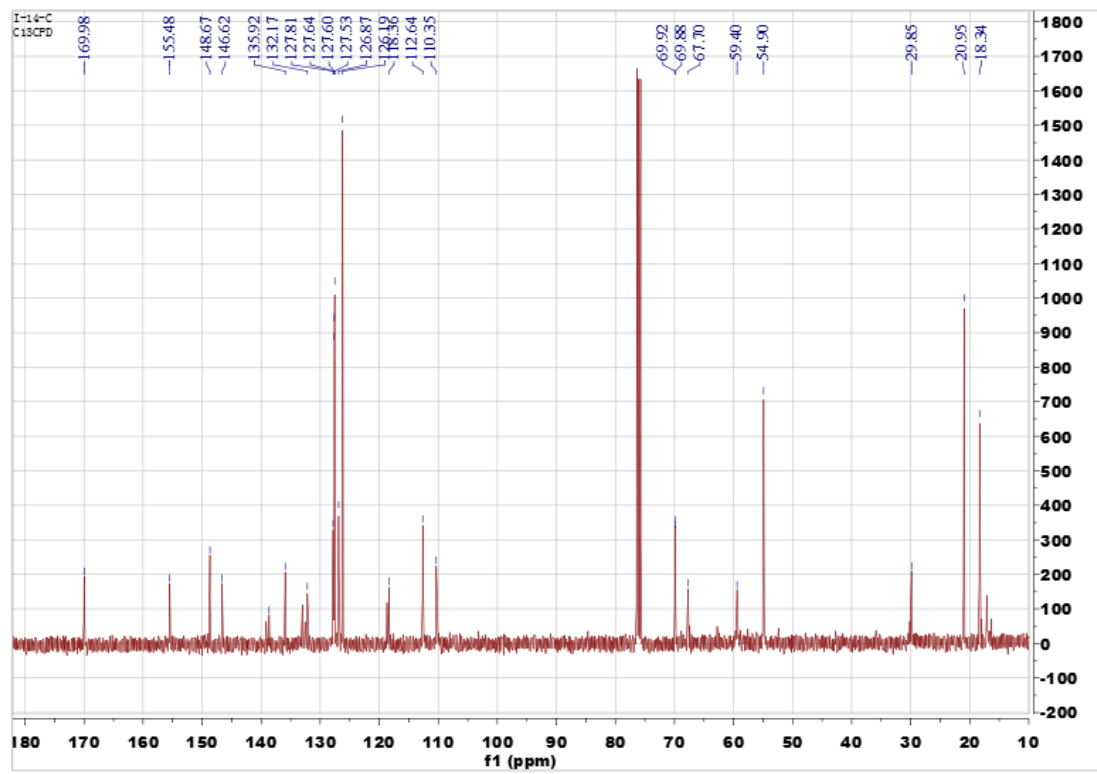

| Sample Name   | lc/ms  | Position    | P1-A4     | Instrument Name | Instrument 1 | User Name              |                       |
|---------------|--------|-------------|-----------|-----------------|--------------|------------------------|-----------------------|
| Inj Vol       | 2      | InjPosition |           | SampleType      | Sample       | IRM Calibration Status | Some Ions Missed      |
| Data Filename | I-14.d | ACQ Method  | chen-ms.m | Comment         |              | Acquired Time          | 9/23/2013 11:24:42 AM |

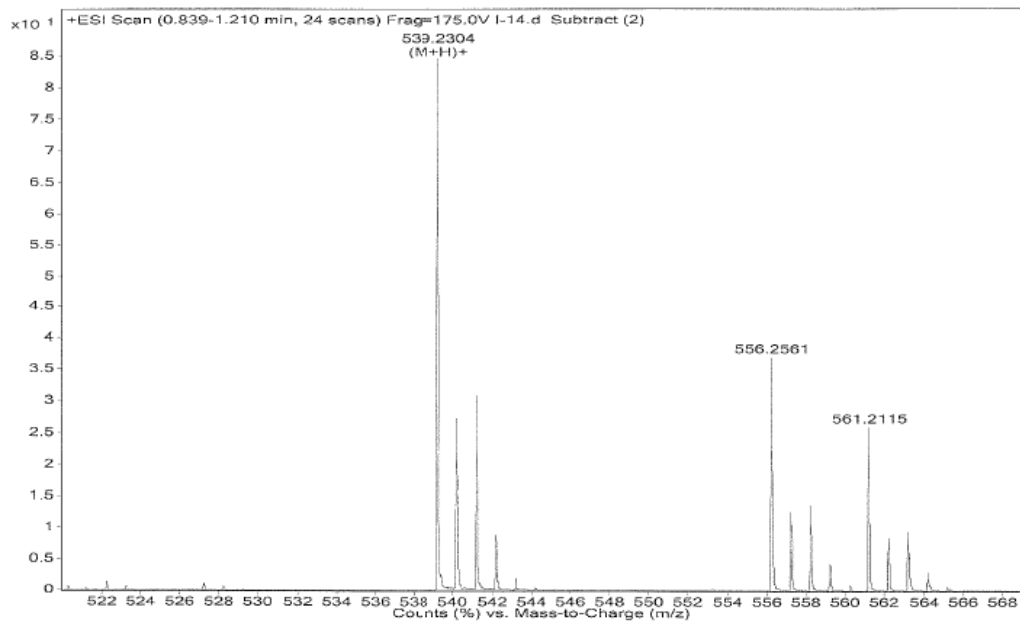

9o

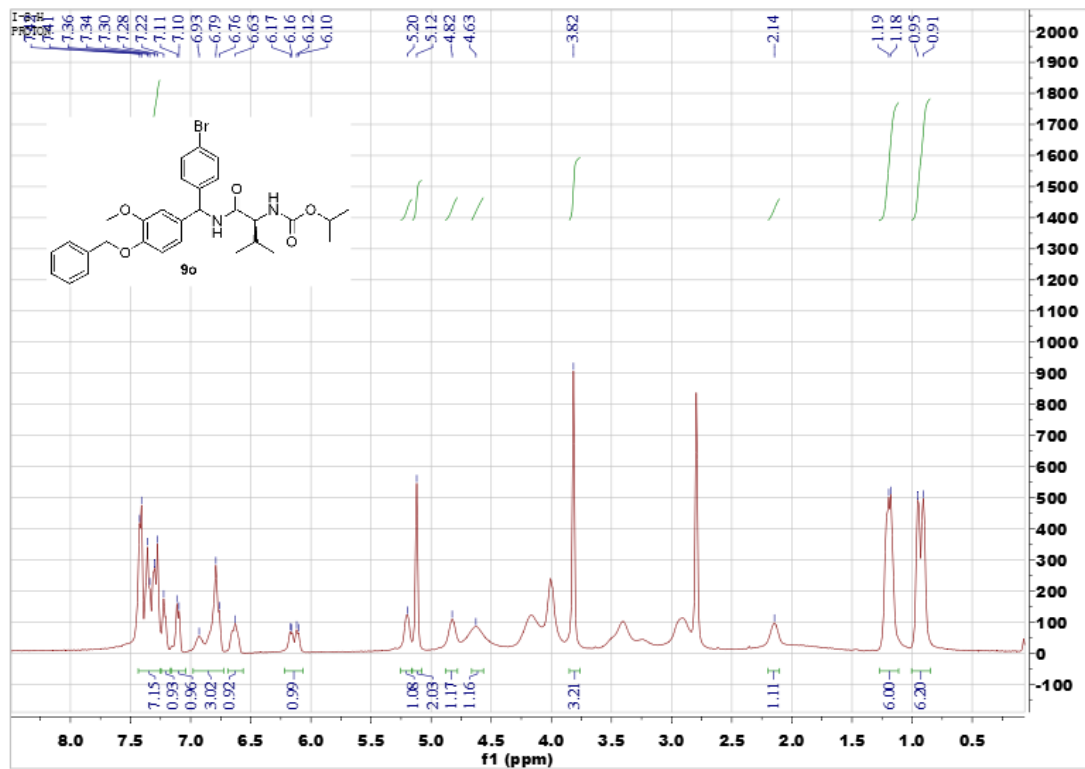

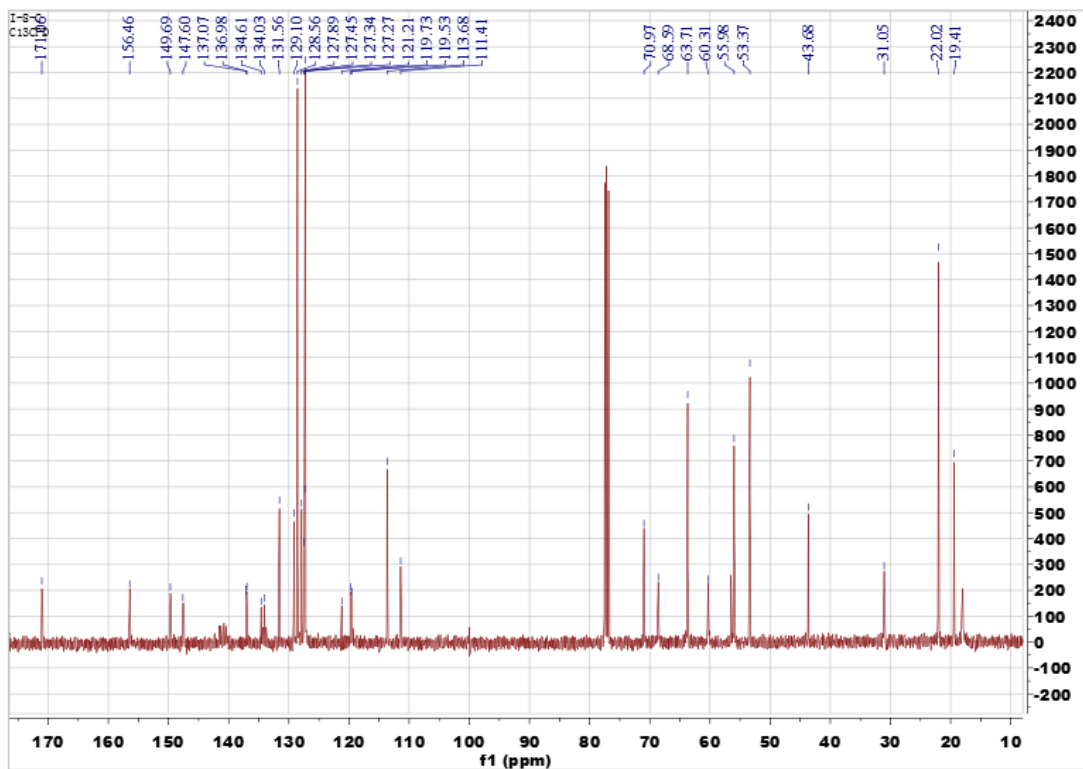

| Sample Name   | lc/ms  | Position    | P1-A5      | Instrument Name | Instrument 1 | User Name              |                       |
|---------------|--------|-------------|------------|-----------------|--------------|------------------------|-----------------------|
| Inj Vol       | 2      | InjPosition |            | SampleType      | Sample       | IRM Calibration Status | Some Ions Missed      |
| Data Filename | I-15.d | ACQ Method  | cheri-ms.m | Comment         |              | Acquired Time          | 9/23/2013 11:28:28 AM |

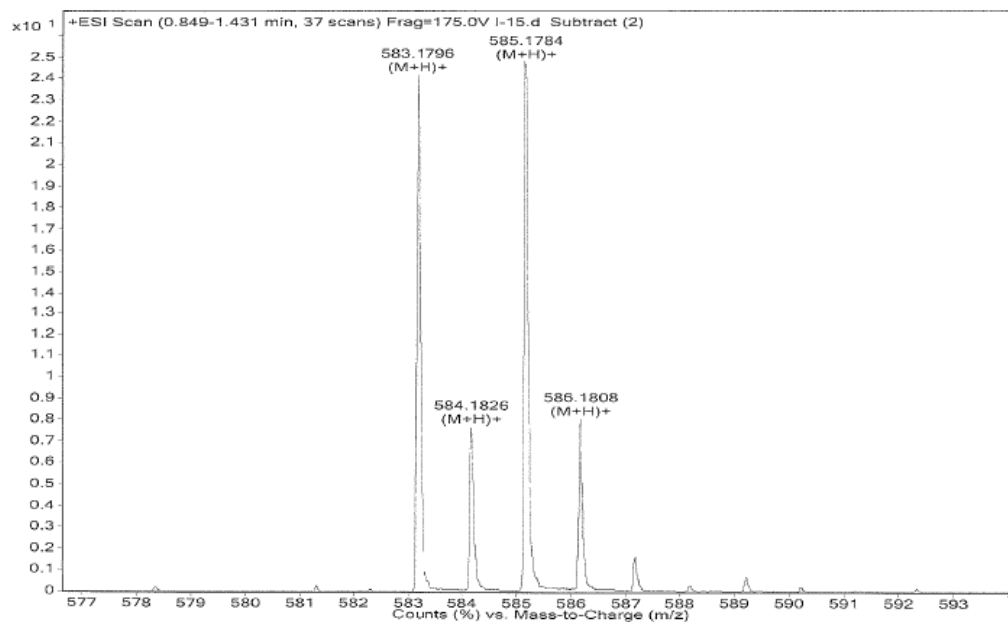

9p

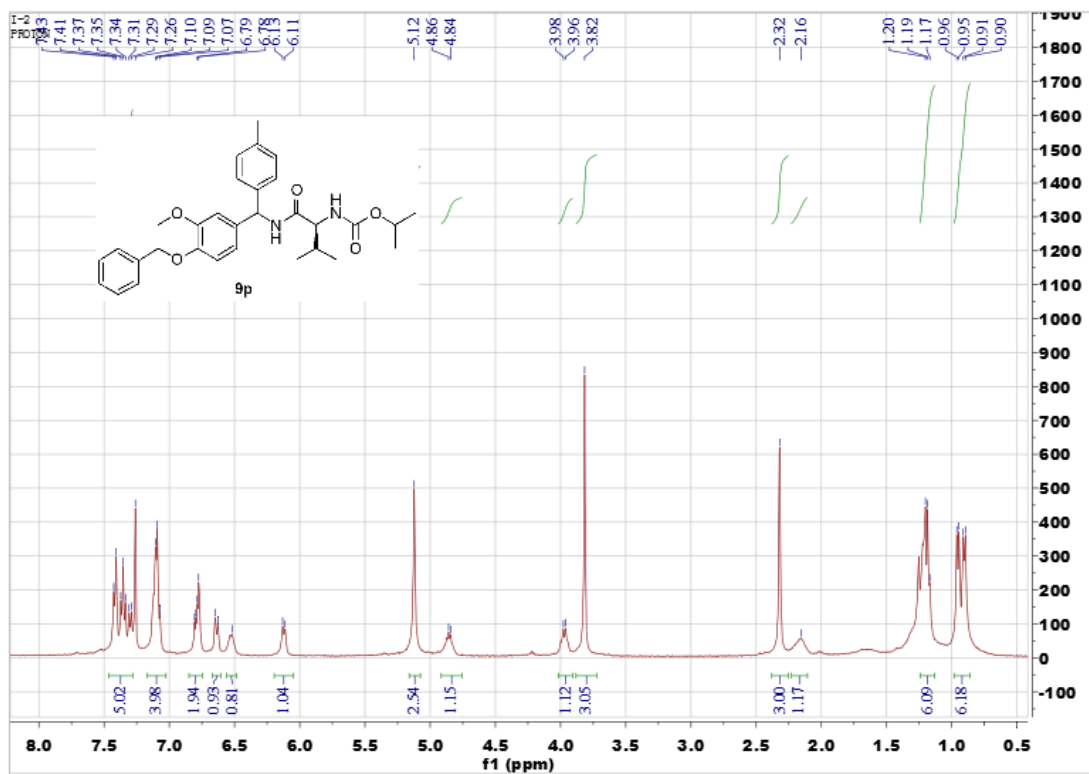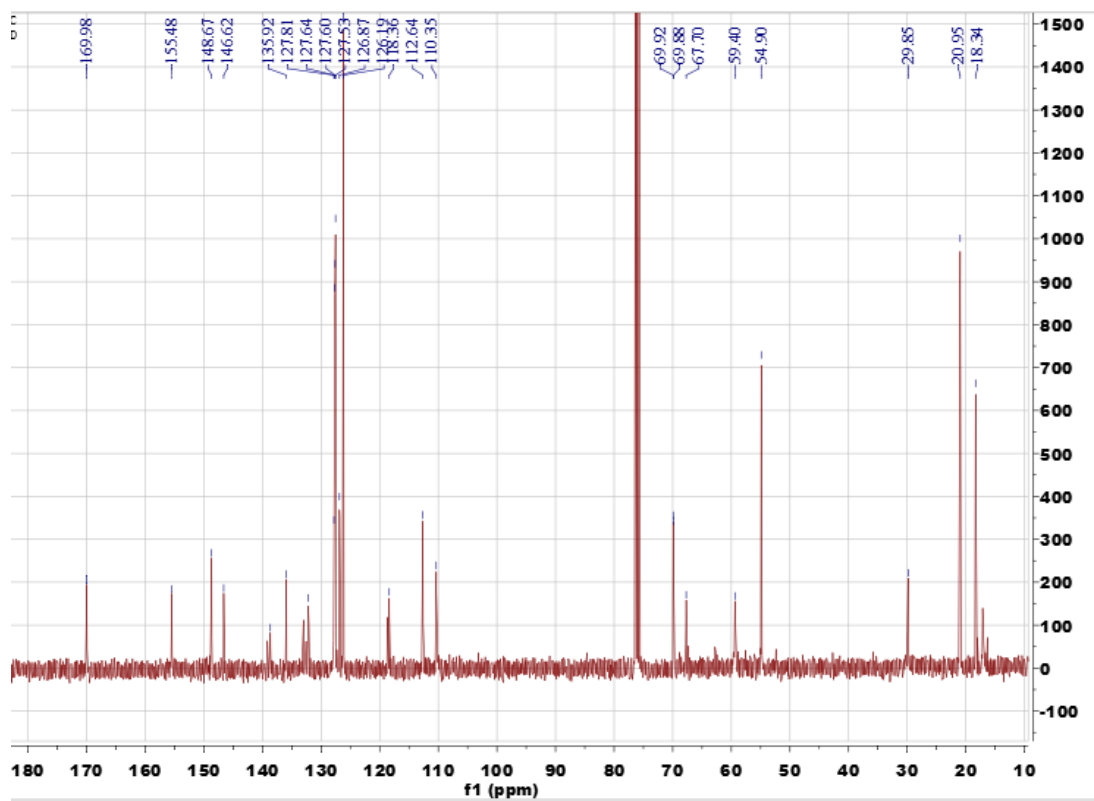

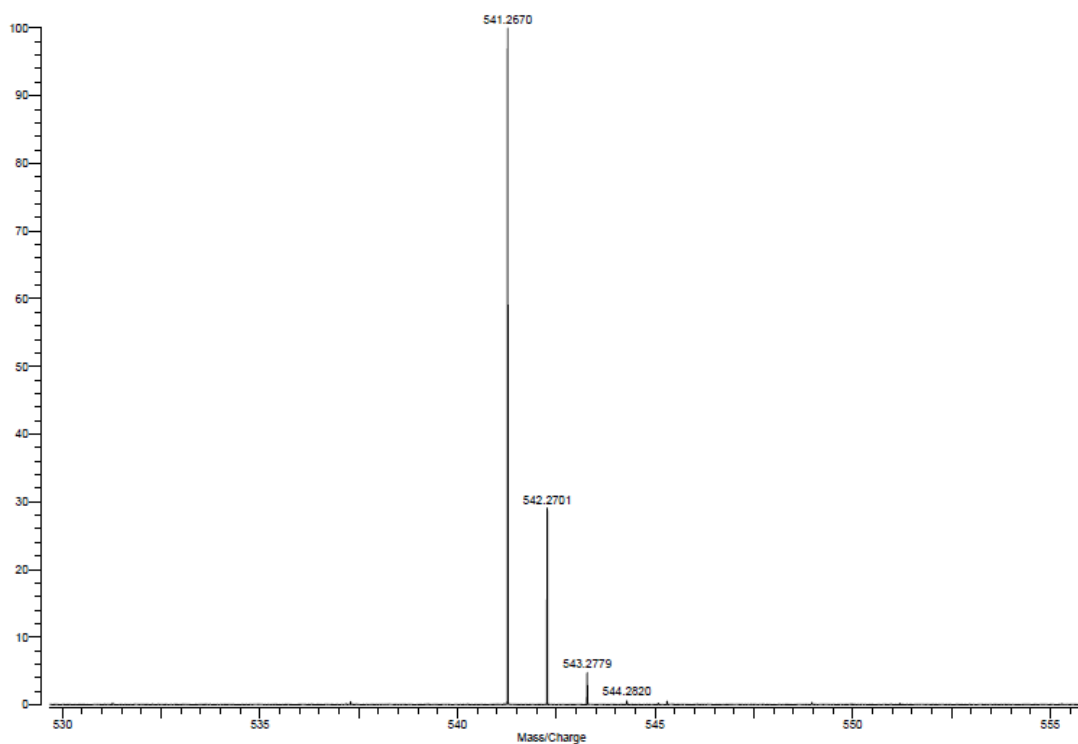

9q

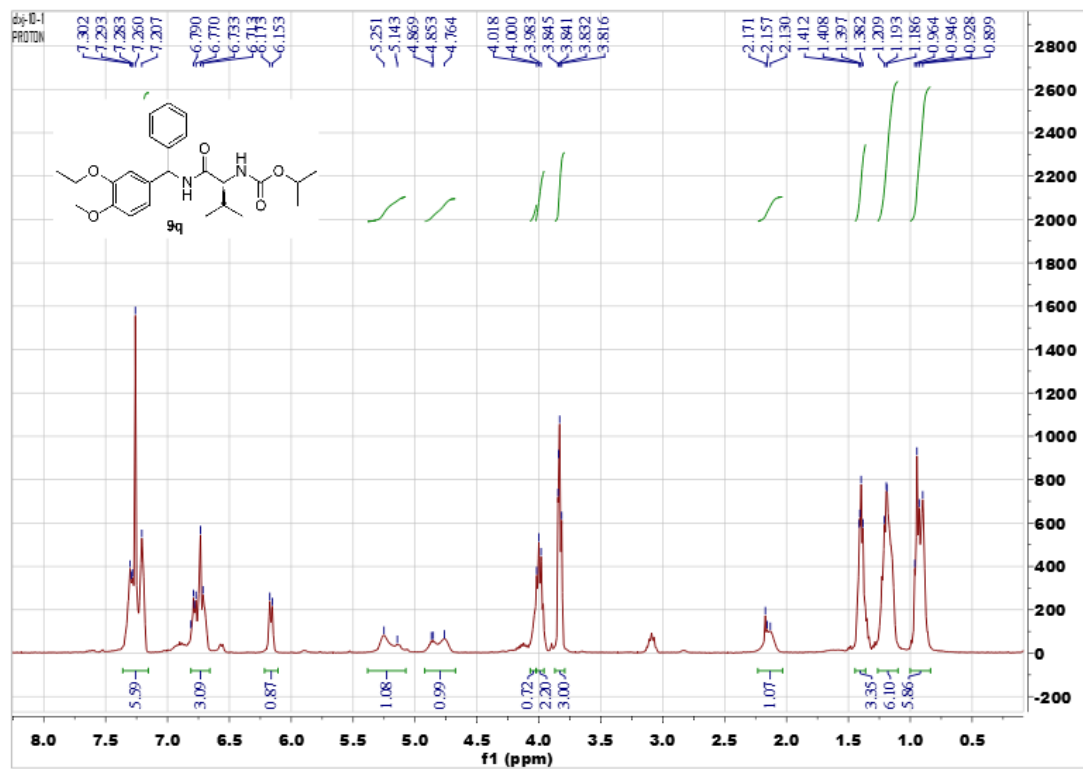



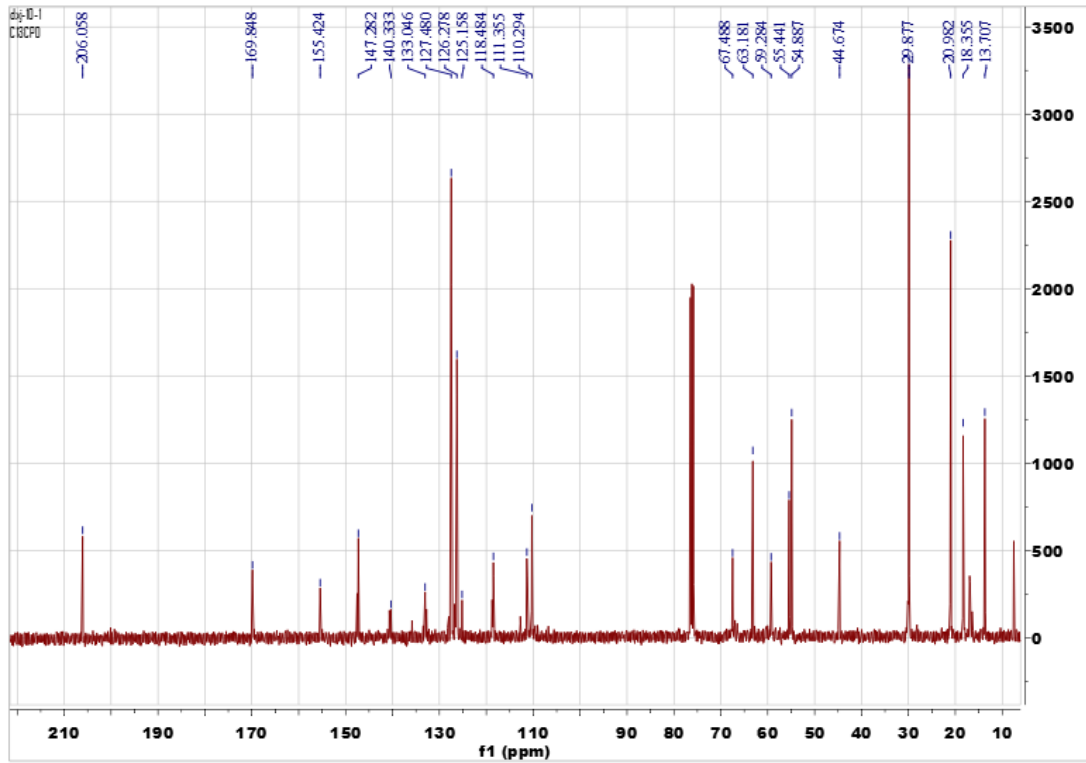

|               |        |             |           |                 |              |                        |                       |
|---------------|--------|-------------|-----------|-----------------|--------------|------------------------|-----------------------|
| Sample Name   | lc/ms  | Position    | P1-A6     | Instrument Name | Instrument 1 | User Name              |                       |
| Inj Vol       | 2      | InjPosition |           | SampleType      | Sample       | IRM Calibration Status | Some Iores Missed     |
| Data Filename | I-17.d | ACQ Method  | chen-ms.m | Comment         |              | Acquired Time          | 9/23/2013 11:32:14 AM |

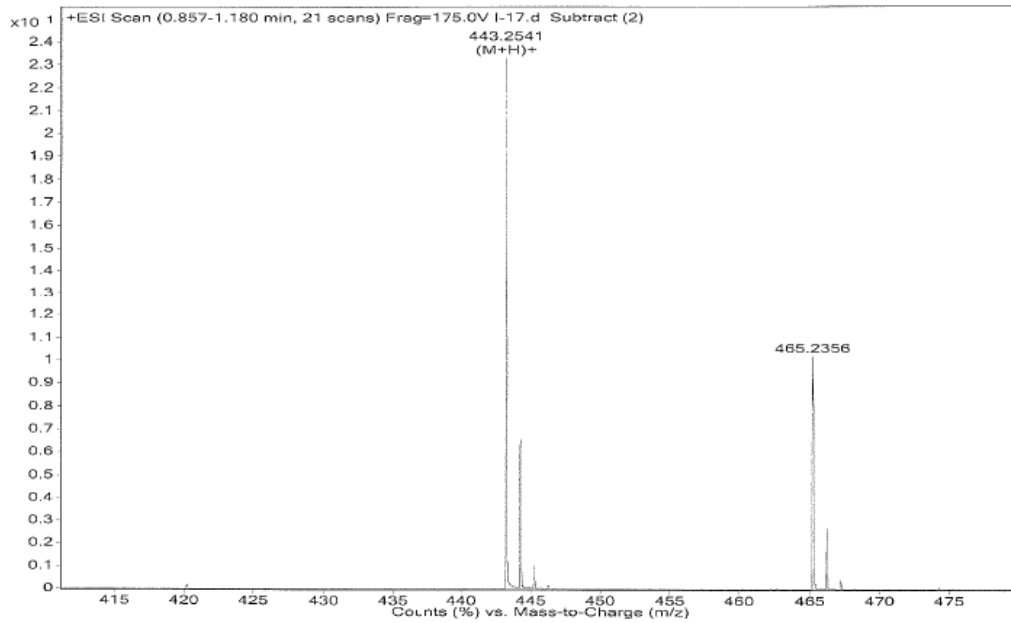

9r

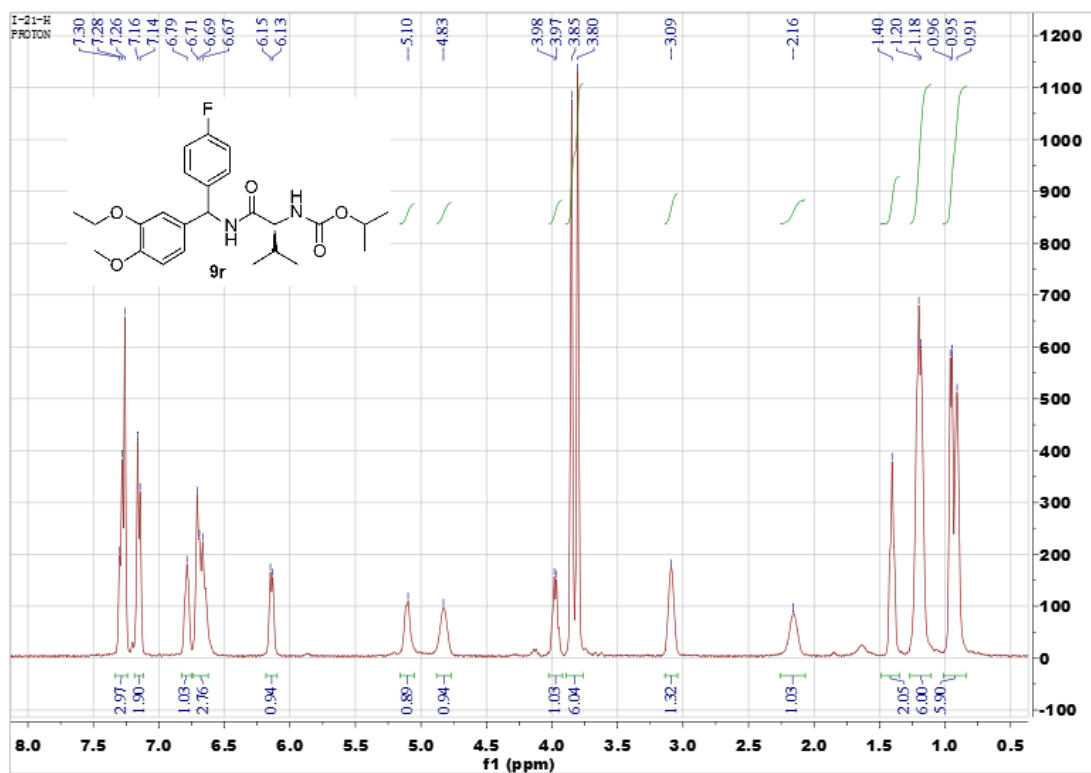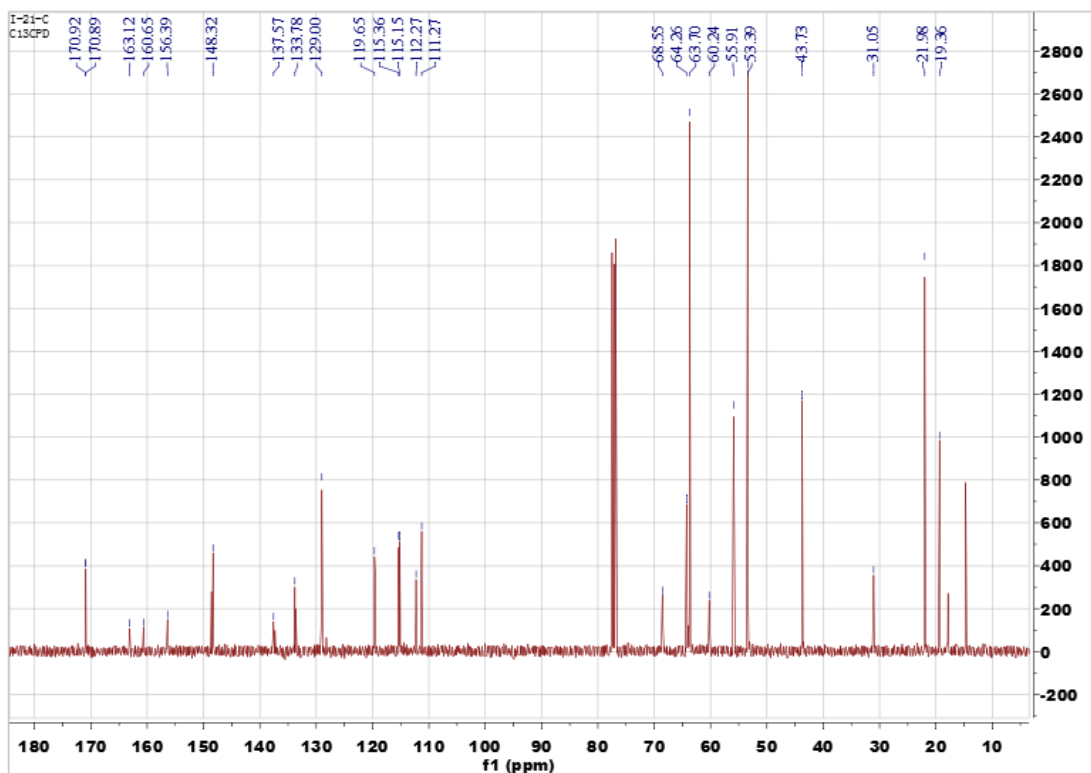

|               |             |             |             |                 |                                   |                        |                  |
|---------------|-------------|-------------|-------------|-----------------|-----------------------------------|------------------------|------------------|
| Sample Name   | Unavailable | Position    | Unavailable | Instrument Name | Unavailable                       | User Name              | Unavailable      |
| Inj Vol       | Unavailable | InjPosition | Unavailable | SampleType      | Unavailable                       | IRM Calibration Status | Some Ions Missed |
| Data Filename | 1-18.d      | ACQ Method  |             | Comment         | Sample information is unavailable | Acquired Time          | Unavailable      |

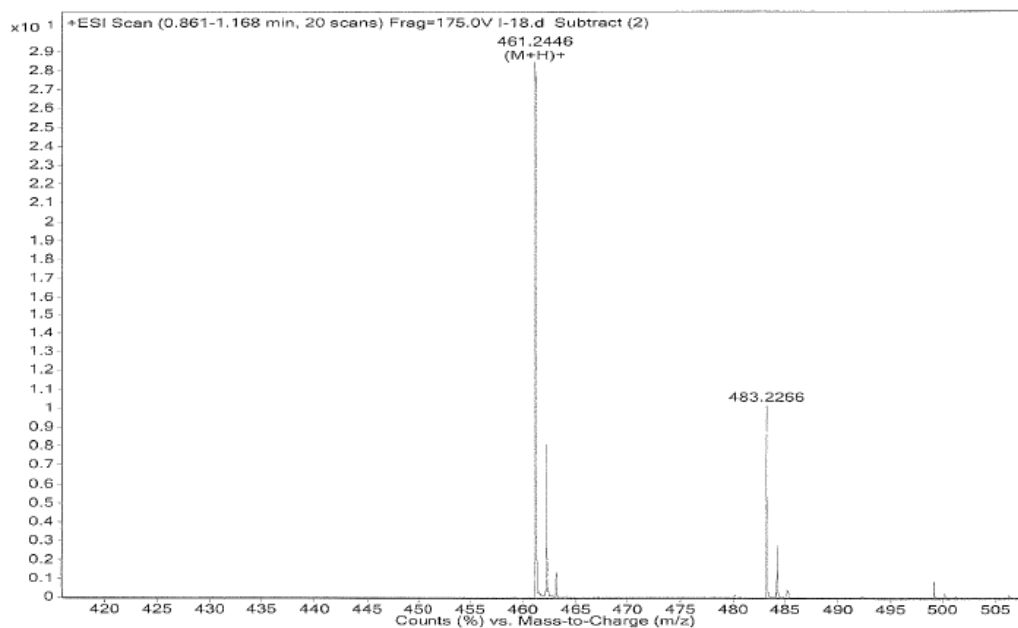

9s

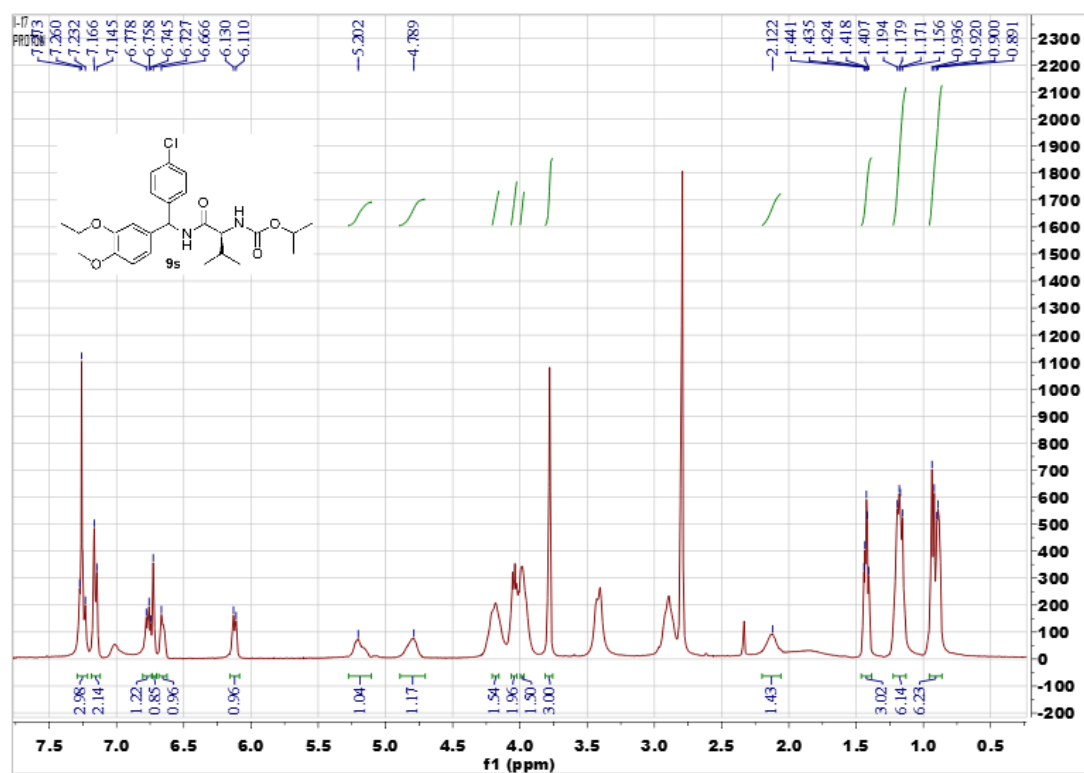

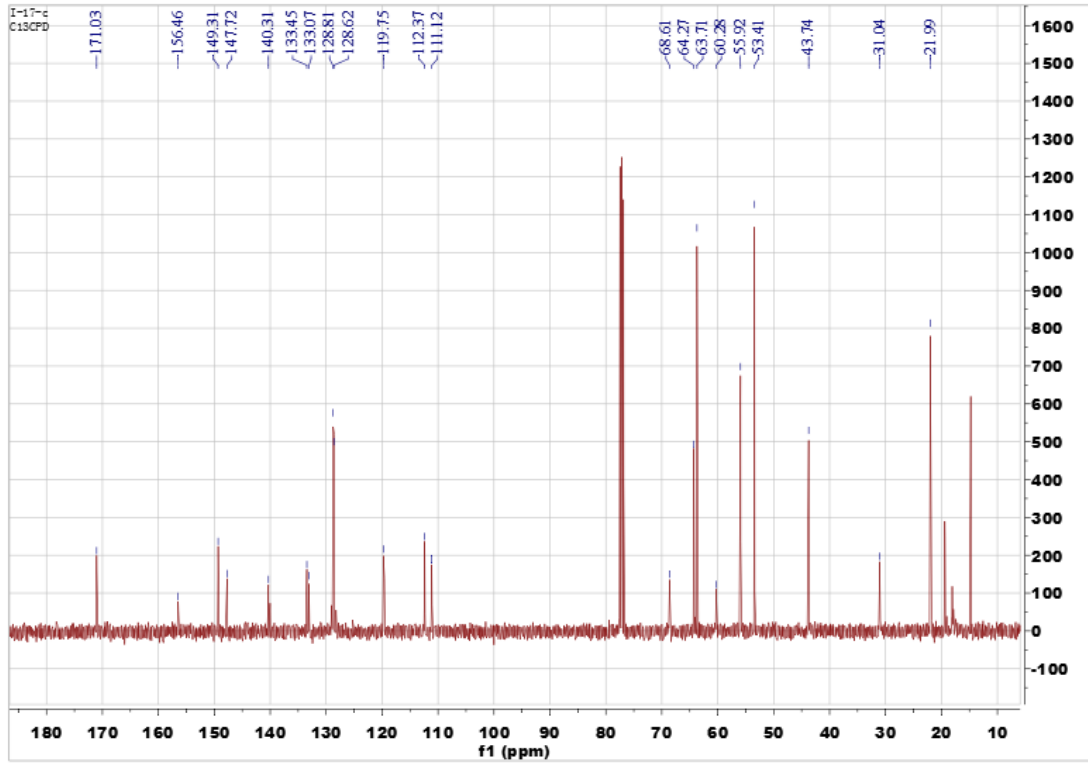

| Sample Name   | lc/ms  | Position    | P1-A1     | Instrument Name | Instrument 1 | User Name              |
|---------------|--------|-------------|-----------|-----------------|--------------|------------------------|
| Inj Vol       | 2      | InjPosition |           | SampleType      | Sample       | IRM Calibration Status |
| Data Filename | I-19.d | ACQ Method  | chen-rs.m | Comment         |              | Acquired Time          |

Some Ions Missed  
9/23/2013 11:41:07 AM

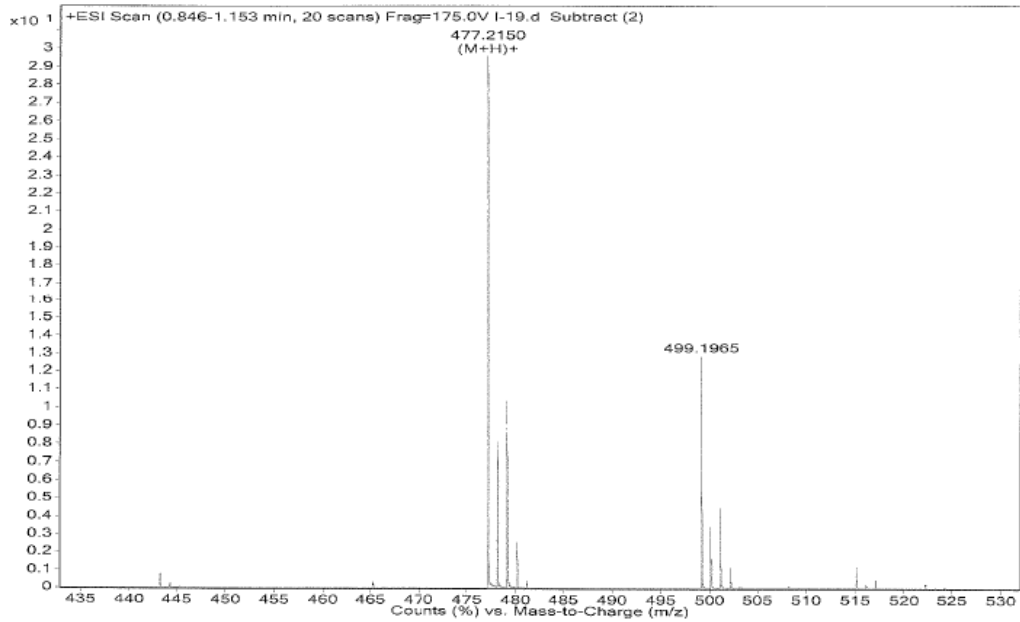

9t

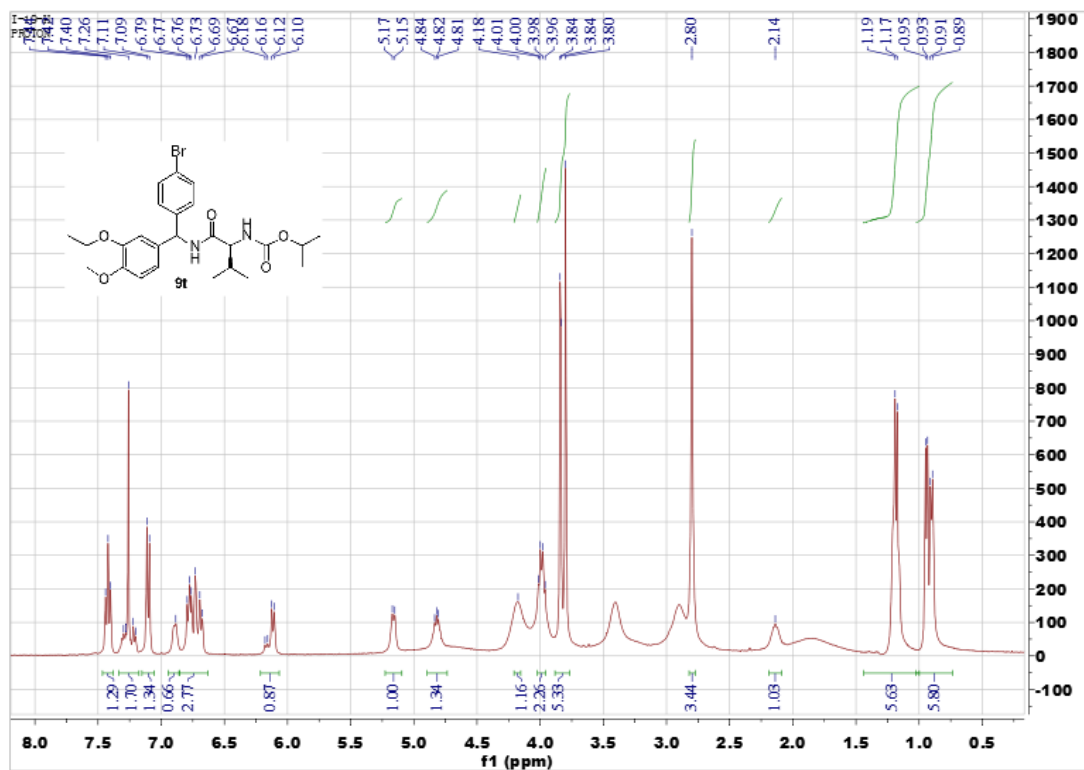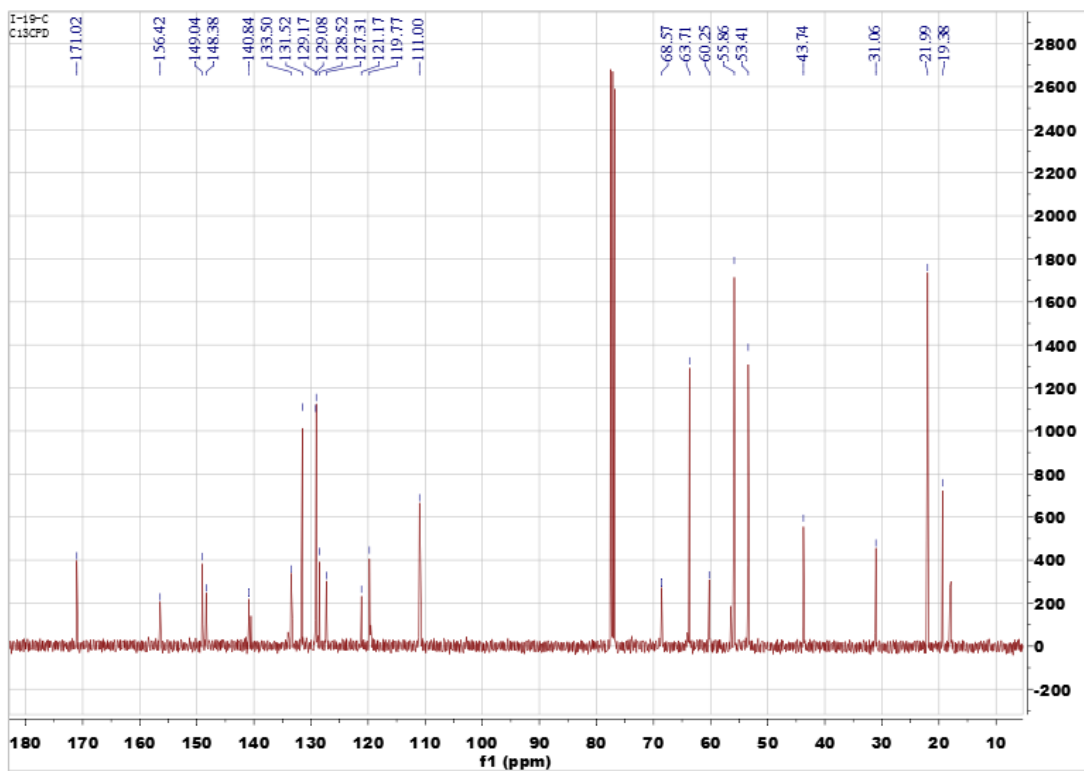

| Sample Name   | lc/ms | Position    | P1-A3     | Instrument Name | Instrument 1 | User Name              |
|---------------|-------|-------------|-----------|-----------------|--------------|------------------------|
| Inj Vol       | 2     | InjPosition |           | SampleType      | Sample       | IRM Calibration Status |
| Data Filename | 130d  | ACQ Method  | chen-ms.m | Comment         |              | Acquired Time          |

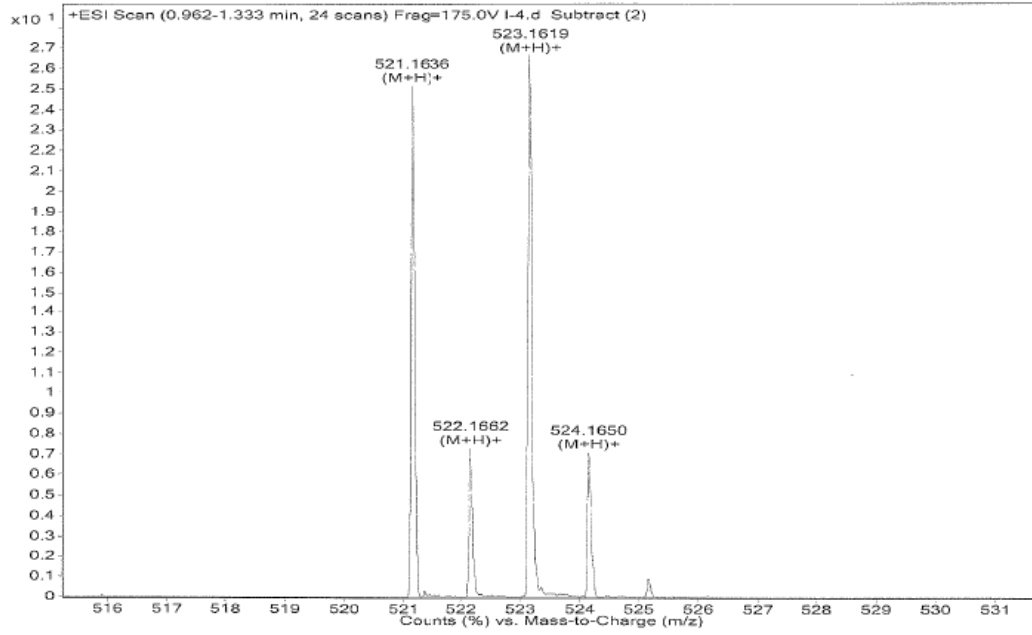

9u

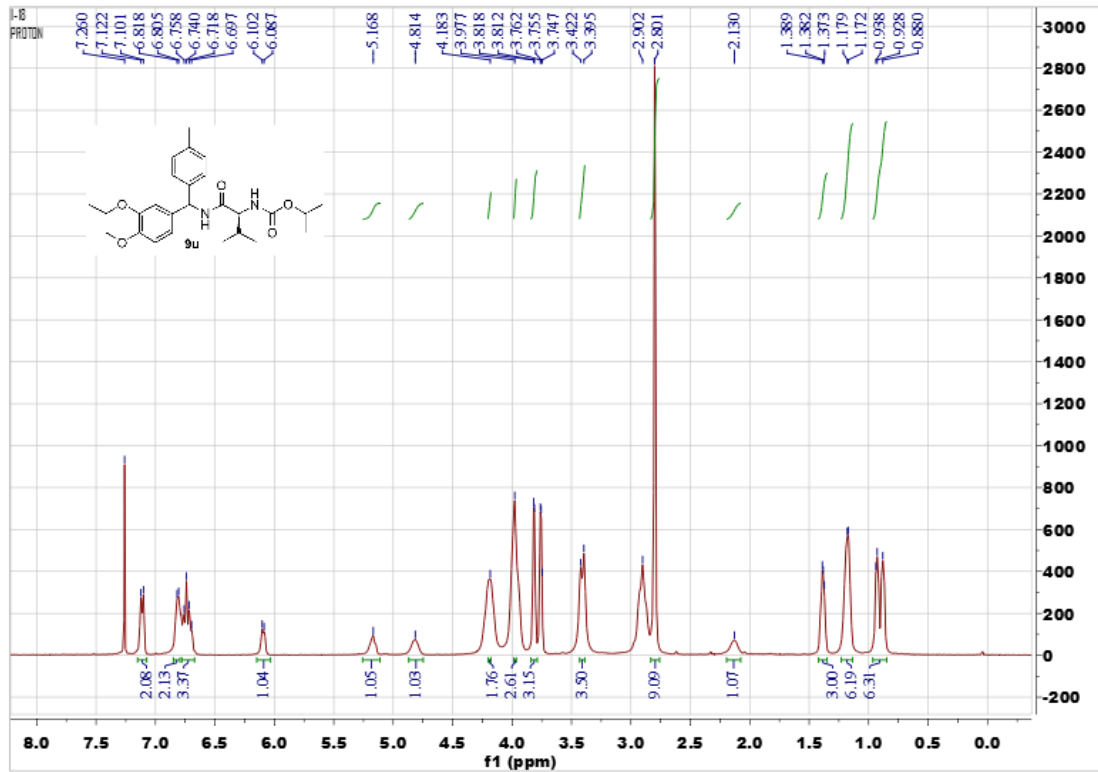

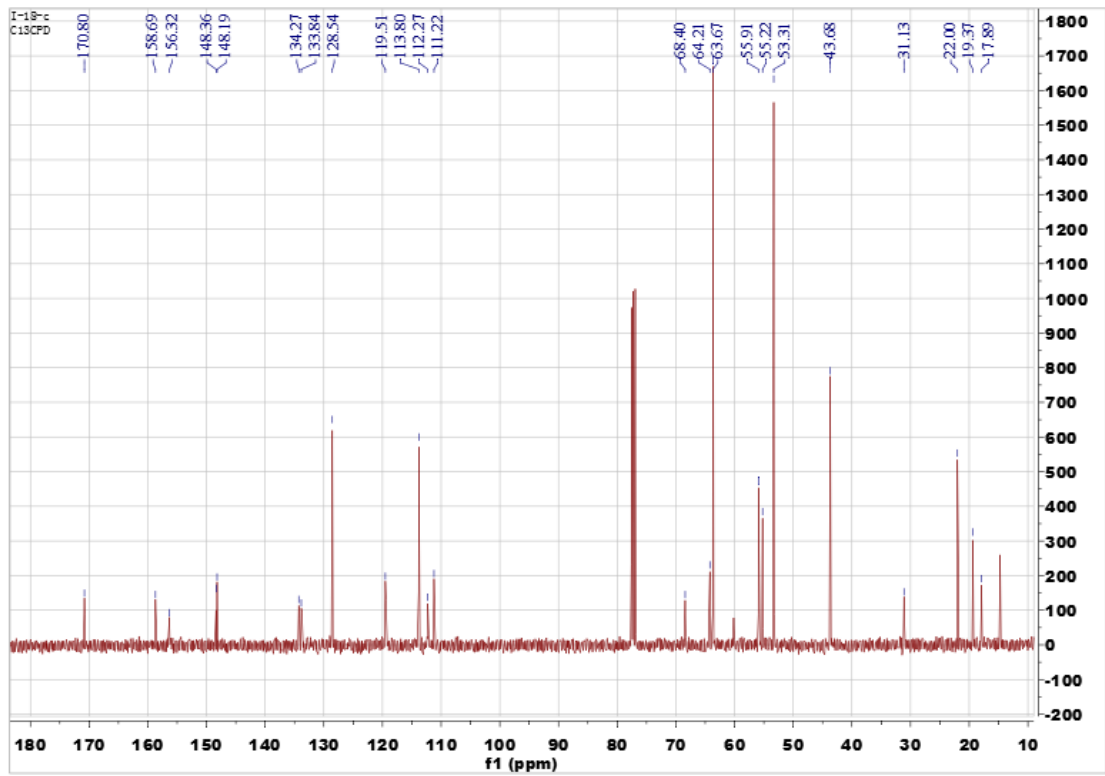

| Sample Name   | lc/ms  | Position    | P1-A3     | Instrument Name | Instrument 1 | User Name              |                       |
|---------------|--------|-------------|-----------|-----------------|--------------|------------------------|-----------------------|
| Inj Vol       | 2      | InjPosition |           | SampleType      | Sample       | IRM Calibration Status | Some Ions Missed      |
| Data Filename | I-21.d | ACQ Method  | chen-ms.m | Comment         |              | Acquired Time          | 9/23/2013 11:48:40 AM |

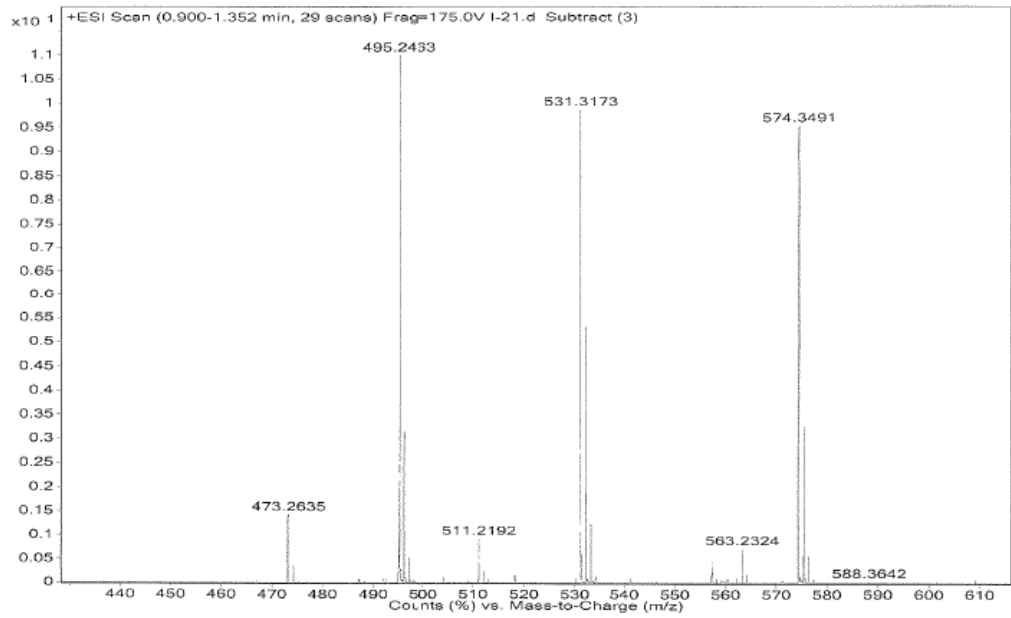

9v

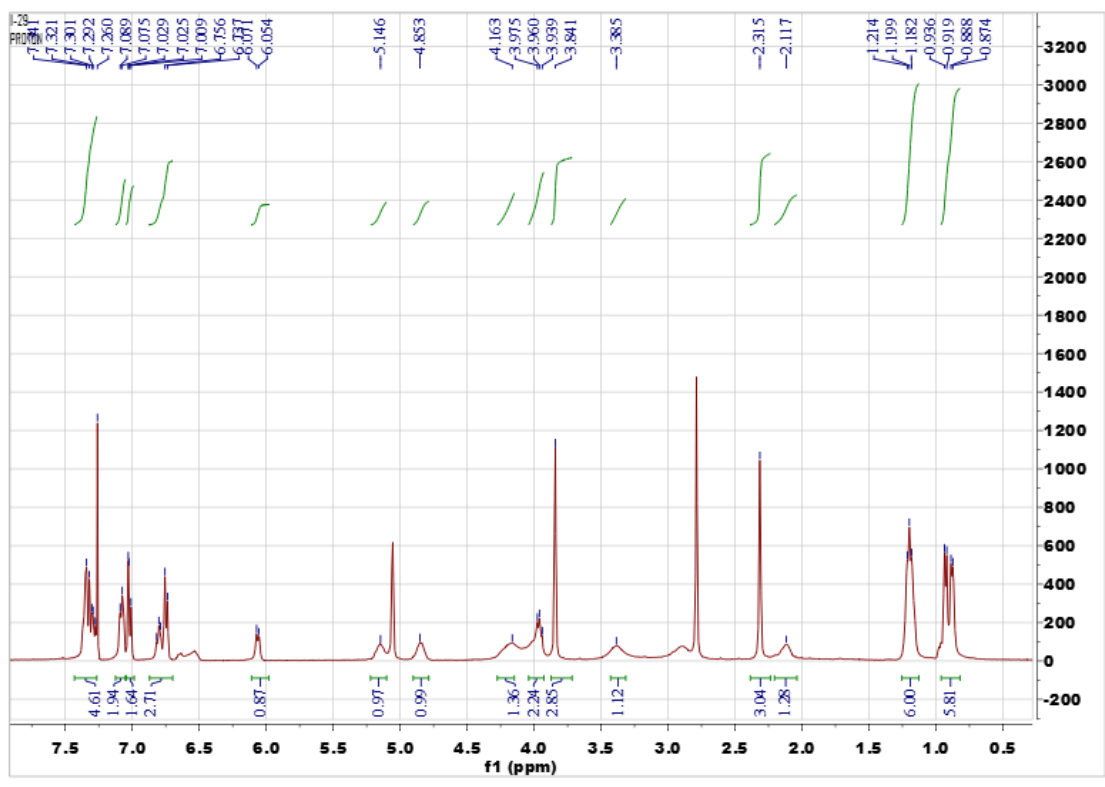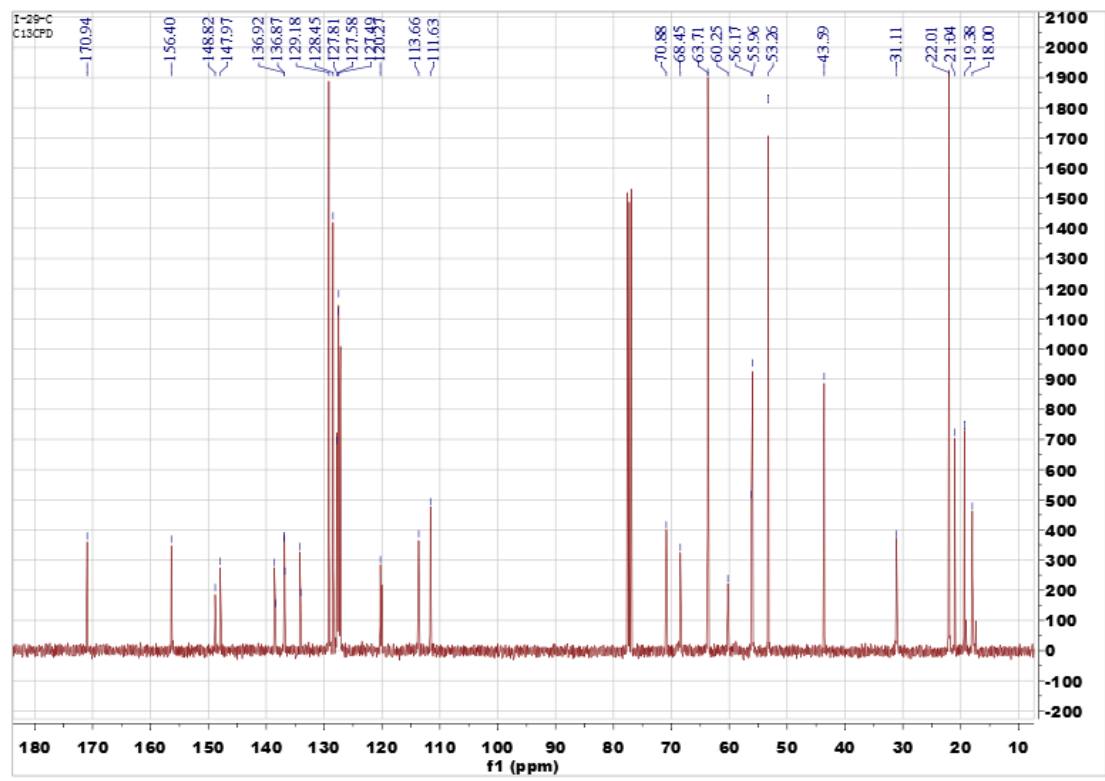



|               |        |             |           |                 |              |                        |                       |
|---------------|--------|-------------|-----------|-----------------|--------------|------------------------|-----------------------|
| Sample Name   | lc/ms  | Position    | P1-M      | Instrument Name | Instrument 1 | User Name              |                       |
| Inj Vol       | 2      | InjPosition |           | SampleType      | Sample       | IRM Calibration Status | Some Ions Missed      |
| Data Filename | 1-22.d | ACQ Method  | chen-ms.m | Comment         |              | Acquired Time          | 9/23/2013 11:52:25 AM |

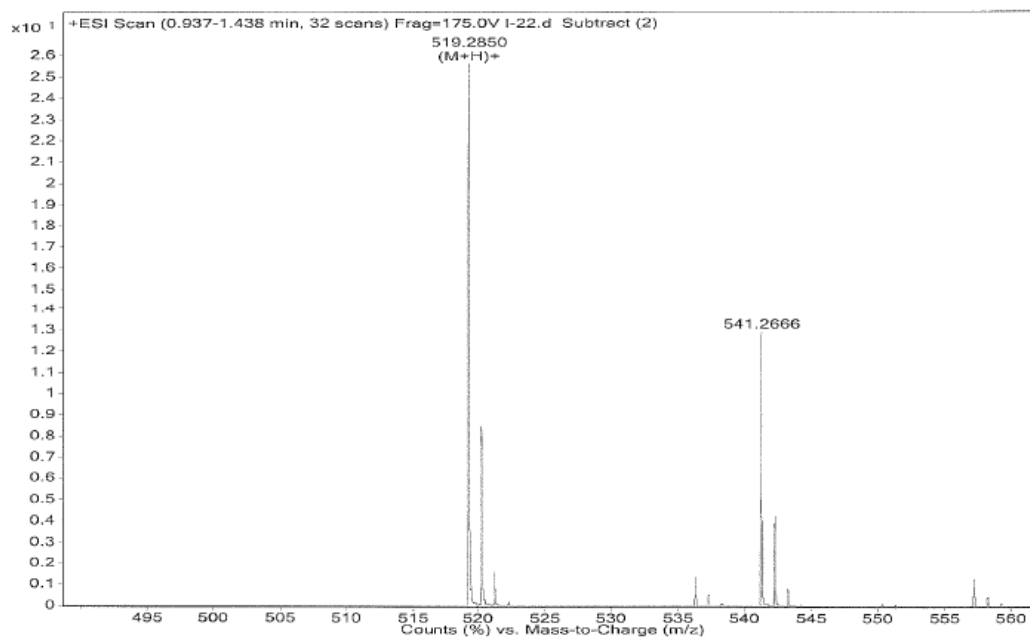

Supplement: c4ob00744a1.pdf [file c4ob00744a1.pdf]
